# Supplementary material
Source: publisher site journal article supplement (https://www.dovepress.com/get_supplementary_file.php?f=303521.xlsx)
Supplement: Supplementary file 1 [file get_supplementary_file.php]

## Sheet: Table S1
Table S1 The RNA-seq data of 10 μg/mL GO-Cu nanocomposite-treated and WT S. mutans cells.
Gene	ID	Name	Length	GOCu1:read count	GOCu1:fpkm	GOCu2:read count	GOCu2:fpkm	GOCu3:read count	GOCu3:fpkm	WT1:read count	WT1:fpkm	WT2:read count	WT2:fpkm	WT3:read count	WT3:fpkm
gene0	dnaA		1359	7664	576.821	10169	728.774	8245	635.457	5412	427.551	7386	528.335	6454	474.851
gene1	dnaN		1137	1346	121.085	1483	127.032	1540	141.865	1254	118.409	1635	139.79	1644	144.574
gene2	-		192	782	416.591	927	470.232	909	495.881	567	317.052	654	331.128	863	449.425
gene3	-		1116	1282	117.498	1656	144.521	1291	121.165	1690	162.582	1772	154.354	1656	148.369
gene4	pth		570	195	34.9917	285	48.6972	238	43.7338	233	43.8864	263	44.8539	295	51.7481
gene5	trcF		3489	2429	71.2084	3274	91.3927	2327	69.8571	2629	80.8982	3101	86.4013	2452	70.2695
gene6	-		273	79	29.5985	92	32.8216	84	32.2279	85	33.4276	56	19.9409	80	29.3005
gene7	-		372	69	18.9719	71	18.5887	79	22.2433	67	19.3366	75	19.5992	58	15.5895
gene110	-		492	4284	890.613	5505	1089.75	2228	474.313	7930	1730.44	5669	1120.11	2754	559.688
gene950	-		126	0	0	0	0	0	0	0	0	0	0	0	0
gene951	smf		843	331	40.1611	420	48.5239	384	47.711	299	38.0796	367	42.3212	417	49.4602
gene952	topA		2118	1922	92.818	2235	102.775	1655	81.8441	2001	101.431	2295	105.336	2097	98.9965
gene953	gid		1335	801	61.37	758	55.2996	915	71.7885	1151	92.5643	1067	77.6967	1363	102.085
gene954	gtfB		4431	1517	35.0178	1762	38.7292	1286	30.3987	2900	70.266	2403	52.7195	1965	44.3413
gene955	gtfC		4368	15300	358.273	16092	358.807	13963	334.82	18571	456.459	18582	413.551	15302	350.278
gene956	-		753	211	28.6611	298	38.5439	211	29.3496	229	32.6505	219	28.2728	229	30.408
gene957	-		2004	324	16.5368	290	14.094	374	19.5474	343	18.3758	366	17.7543	358	17.8621
gene958	-		672	1254	190.868	1646	238.558	1496	233.173	830	132.604	1212	175.329	1330	197.893
gene959	-		954	3811	408.597	5005	510.963	3466	380.536	2520	283.597	3000	305.698	2739	287.072
gene111	-		798	419	53.7052	589	71.8863	367	48.1702	815	109.649	527	64.1989	528	66.1574
gene960	citC		1050	1321	128.682	1620	150.266	1456	145.24	2217	226.687	2542	235.345	1673	159.314
gene961	citG		891	434	49.8215	517	56.5128	453	53.252	718	86.5159	695	75.8275	660	74.0651
gene962	-		690	342	50.697	447	63.0946	402	61.0228	559	86.9785	598	84.2503	495	71.7305
gene963	-		1404	240	17.4843	294	20.3946	361	26.9312	500	38.2342	490	33.9272	565	40.2373
gene964	-		381	650	174.499	899	229.81	705	193.811	635	178.936	624	159.213	853	223.857
gene965	bcc		393	28	7.28736	25	6.19557	29	7.72895	39	10.6542	32	7.91548	55	13.9932
gene966	oadB		1122	412	37.5586	370	32.1176	579	54.0507	582	55.6903	555	48.0861	838	74.679
gene967	-		129	16	12.6863	24	18.1199	11	8.93137	18	14.9807	15	11.3037	21	16.2771
gene968	cilG		309	83	27.4742	129	40.6598	89	30.168	132	45.8632	117	36.8084	85	27.5048
gene112	-		822	430	53.5059	475	56.2802	303	38.6088	626	81.7621	423	50.0251	392	47.6828
gene969	cilB		903	3840	434.959	3565	384.508	4712	546.554	4933	586.506	4680	503.823	6235	690.393
gene970	cilA		1536	6616	440.564	8449	535.733	6653	453.672	8054	562.95	8230	520.869	7411	482.429
gene971	citG2		489	525	109.813	623	124.083	471	100.885	698	153.248	752	149.496	478	97.7387
gene972	pycB		1392	3115	228.888	3291	230.262	3099	233.183	4479	345.455	4555	318.104	3518	252.699
gene973	-		162	2	1.26276	2	1.2024	3	1.93964	2	1.32545	0	0	2	1.23442
gene974	-		426	145	34.8147	172	39.3236	131	32.209	129	32.5109	148	33.7732	117	27.4615
gene975	-		381	40	10.7384	81	20.7059	61	16.7695	52	14.653	54	13.7781	72	18.8954
gene976	-		639	506	80.9943	1100	167.659	487	79.8258	322	54.1009	445	67.6985	429	67.128
gene977	-		1035	1537	151.893	2319	218.22	1275	129.028	1199	124.374	1591	149.434	1369	132.255
gene978	-		357	1	0.286508	0	0	0	0	1	0.300733	0	0	2	0.560156
gene113	-		417	633	155.265	970	226.553	485	121.821	725	186.66	641	149.431	465	111.497
gene979	-		231	0	0	0	0	1	0.453423	0	0	0	0	0	0
gene980	xis		204	1	0.501389	0	0	5	2.56717	3	1.57885	0	0	4	1.96055
gene981	tnr5		1167	502	43.9985	725	60.5064	395	35.4521	380	34.9592	471	39.2346	438	37.5276
gene982	-		1071	6870	656.103	5637	512.616	8037	785.995	6309	632.441	7161	649.986	7142	666.773
gene983	glrA		882	221	25.6288	288	31.8023	234	27.7883	237	28.8489	329	36.2616	181	20.5191
gene984	-		744	8	1.09982	9	1.17816	26	3.66029	16	2.30885	15	1.95992	12	1.61271
gene985	-		879	21308	2479.47	22278	2468.43	16183	1928.35	14442	1763.96	16615	1837.52	12271	1395.85
gene986	-		693	16123	2379.67	15754	2214.07	12279	1855.86	10430	1615.85	14997	2103.73	8980	1295.66
gene987	-		834	8789	1077.9	9696	1132.3	6663	836.795	5649	727.202	6604	769.769	5302	635.655
gene114	-		2196	2483	115.651	2183	96.8178	1998	95.2968	2817	137.722	2602	115.185	2394	109.003
gene988	-		756	4354	589.076	3891	501.272	4747	657.677	3344	474.891	3940	506.634	4854	641.986
gene989	-		747	1826	250.026	2355	307.047	1994	279.589	2015	289.603	2567	334.06	2234	299.027
gene990	-		1608	1661	105.655	2218	134.341	1292	84.1573	1986	132.6	2225	134.513	1288	80.0898
gene991	-		996	1302	133.708	1102	107.76	1716	180.457	1598	172.253	1596	155.773	2055	206.3
gene992	-		891	513	58.8904	599	65.4761	693	81.4649	607	73.1409	531	57.9344	746	83.716
gene993	-		834	861	105.595	1278	149.245	848	106.499	790	101.698	1064	124.021	754	90.3967
gene994	-		666	3250	499.13	4814	703.989	2963	465.986	3060	493.283	3767	549.846	2639	396.198
gene995	-		108	540	511.417	746	672.743	726	704.09	710	705.804	700	630.077	859	795.274
gene996	-		567	3609	651.041	4910	843.398	3426	632.877	2383	451.222	3060	524.636	2418	426.403
gene115	-		999	2073	212.246	1920	187.184	1901	199.311	1877	201.72	2193	213.399	1880	188.165
gene997	krpS		981	6807	709.727	7651	759.597	6971	744.289	5661	619.546	6897	683.456	5322	542.442
gene998	-		1062	6147	592.03	6114	560.706	6005	592.248	4539	458.865	5253	480.842	4786	450.605
gene999	-		348	2773	815.033	3803	1064.34	2571	773.817	2131	657.436	2960	826.86	1595	458.278
gene1000	-		642	302	48.1146	386	58.558	313	51.0651	306	51.1724	371	56.177	337	52.4859
gene1001	-		696	800	117.567	701	98.0941	742	111.663	781	120.473	853	119.14	791	113.636
gene1002	radC		630	3028	491.609	3170	490.064	3325	552.798	3198	544.988	3625	559.354	3690	585.643
gene1003	-		120	33	28.1279	21	17.044	21	18.3296	27	24.1564	44	35.6444	21	17.4979
gene1004	satE		738	548	75.9502	334	44.0782	422	59.8923	523	76.0842	643	84.6982	669	90.6394
gene1005	satD		669	17546	2682.61	21412	3117.2	17872	2798.09	16363	2625.95	18493	2687.21	16301	2436.33
gene1006	satC		528	637	123.399	898	165.644	709	140.646	629	127.899	481	88.5586	623	117.978
gene1007	ffh		1551	14880	981.287	16197	1017.08	16083	1086.1	14618	1011.87	14850	930.753	16784	1082.01
gene1008	ylxM		333	1875	575.92	2263	661.872	2095	658.954	1986	640.301	2443	713.18	1997	599.627
gene1009	opuAb		1731	6506	384.434	7420	417.485	7416	448.733	6046	374.991	6820	383.007	7630	440.732
gene1010	opuAa		1215	5786	487.087	8650	693.384	6225	536.634	5184	458.076	6553	524.304	5573	458.628
gene1011	-		633	120	19.3902	108	16.6171	137	22.669	114	19.3353	139	21.3467	145	22.904
gene1012	-		699	264	38.6306	335	46.6769	291	43.6045	225	34.5585	301	41.8609	308	44.0576
gene1013	guaA		1554	2931	192.917	2982	186.892	4021	271.018	3140	216.934	3391	212.127	4783	307.749
gene1014	-		789	671	86.9862	670	82.705	543	72.0839	710	96.6119	952	117.295	483	61.2093
gene1015	-		861	2050	243.532	2068	233.928	1631	198.411	2465	307.371	2489	281.023	1597	185.46
gene1016	-		447	60	13.7293	52	11.33	55	12.8876	89	21.3763	55	11.9612	49	10.9606
gene116	-		237	15	6.47363	8	3.28757	26	11.4905	19	8.60705	22	9.02389	35	14.7661
gene118	-		171	0	0	0	0	0	0	0	0	0	0	1	0.584725
gene1017	-		528	193	37.3877	204	37.6297	134	26.5819	224	45.5474	204	37.5592	160	30.2994
gene1018	-		852	17080	2050.47	13967	1596.61	13678	1681.51	13256	1670.41	15160	1729.73	12665	1486.32
gene1019	-		492	3878	806.209	3305	654.245	3227	686.988	2979	650.062	3458	683.25	3097	629.395
gene1020	fthS		1671	17552	1074.37	13580	791.512	18802	1178.54	17496	1124.12	19352	1125.82	23624	1413.59
gene1021	-		687	2784	414.493	3976	563.668	2915	444.424	2003	313.021	2866	405.545	2704	393.548
gene1022	dfp		540	583	110.428	596	107.495	572	110.947	466	92.6491	591	106.393	519	96.0995
gene1023	-		573	1878	335.232	1674	284.534	1804	329.759	1645	308.22	1940	329.129	1892	330.152
gene1024	pgm		1716	11289	672.888	10073	571.71	10999	671.353	11081	693.284	11890	673.572	13045	760.106
gene1025	-		1746	6103	357.523	5710	318.512	6889	413.264	5613	345.144	6253	348.148	7489	428.871
gene1026	-		1734	6106	360.174	5964	334.983	7029	424.58	5786	358.244	6868	385.036	6404	369.275
gene119	-		138	3	2.22355	2	1.41151	0	0	3	2.33395	3	2.1133	1	0.72455
gene1027	-		615	4331	720.307	6109	967.451	4135	704.232	3632	634.045	3542	559.878	3561	578.954
gene1028	-		978	8190	856.544	10172	1012.98	8074	864.699	6819	748.568	8561	850.952	5994	612.809
gene1029	glyA		1263	2281	184.725	2211	170.498	2889	239.585	2155	183.186	2507	192.961	2553	202.113
gene1030	-		591	3572	618.2	3795	625.401	4252	753.566	3522	639.81	3684	605.971	3974	672.338
gene1031	hemK		837	4015	490.642	5955	692.931	3810	476.776	3355	430.345	4413	512.54	2821	336.996
gene1032	rf1		1080	1917	181.553	2716	244.929	2135	207.057	1856	184.503	2149	193.434	1910	176.83
gene1033	kitH		585	494	86.3726	557	92.7328	642	114.946	605	111.032	677	112.5	885	151.264
gene1034	-		186	50	27.4955	54	28.2758	52	29.2823	33	19.048	36	18.8152	69	37.0923
gene1035	apbE		936	2001	218.663	1849	192.396	2084	233.205	1814	208.071	1790	185.907	2380	254.243
gene1036	-		603	990	167.928	1042	168.3	1083	188.116	995	177.156	1064	171.532	1245	206.443
gene120	-		1101	975	90.5779	1446	127.913	953	90.6611	807	78.6929	1078	95.1812	782	71.0177
gene1037	-		1260	3372	273.73	3475	268.608	3227	268.252	2987	254.515	3624	279.6	2677	212.435
gene1038	wapE		1524	3868	259.601	5602	358.007	3355	230.581	5572	392.532	6159	392.866	4473	293.468
gene1039	-		1509	1320	89.4725	809	52.2148	560	38.87	1112	79.1161	1303	83.9411	1073	71.0981
gene1040	-		657	313	48.7286	233	34.5402	43	6.85517	410	66.9989	385	56.9659	107	16.2842
gene1041	opuBc		1521	81966	5512	86613	5546.1	72446	4988.85	61081	4311.48	82305	5260.37	61956	4072.88
gene1042	opuBa		723	3245	459.072	2716	365.869	3755	543.985	2468	366.485	2708	364.108	4055	560.79
gene1043	-		483	3277	693.96	4043	815.25	3388	734.702	2093	465.234	2526	508.4	2611	540.514
gene1044	-		963	3688	391.714	3356	339.414	5027	546.761	3166	352.967	3435	346.753	5743	596.293
gene8	-		120	0	0	0	0	0	0	0	0	0	0	0	0
gene121	mutR		861	1032	122.597	1640	185.513	968	117.757	742	92.5231	954	107.712	978	113.575
gene1045	-		1125	2166	196.929	2252	194.962	2816	262.177	2505	239.059	2765	238.925	3403	302.452
gene1046	ascB		1437	8064	573.982	9283	629.166	7338	534.855	6845	511.406	8488	574.207	7432	517.126
gene1047	-		399	368	94.3365	335	81.7722	454	119.179	416	111.936	413	100.623	507	127.052
gene1048	-		615	363	60.3721	398	63.0292	350	59.6085	294	51.3241	327	51.6883	284	46.1733
gene1049	-		597	1208	206.965	1115	181.901	1050	184.217	931	167.427	918	149.482	1065	178.37
gene1050	-		576	4967	882.016	5691	962.277	4217	766.825	3809	709.966	4652	785.121	3311	574.757
gene1051	-		813	3965	498.836	4117	493.201	3981	512.881	3257	430.107	3693	441.579	3772	463.905
gene1052	-		1254	2421	197.47	2317	179.954	2507	209.398	2654	227.223	3112	241.247	3388	270.143
gene1053	-		837	321	39.2269	368	42.821	334	41.7961	373	47.8446	384	44.599	372	44.4391
gene1054	-		405	3584	905.144	4136	994.625	3193	825.77	3004	796.332	3820	916.913	2885	712.259
gene1055	srtA		741	23205	3203.08	21104	2773.83	20588	2910.12	20624	2988.16	21129	2771.92	24636	3324.29
gene1056	gyrA		2478	2875	118.67	2436	95.7436	2853	120.591	2790	120.879	3265	128.086	3065	123.673
gene1057	ldh		987	22475	2329.1	22218	2192.41	25039	2657.14	24571	2672.73	30581	3011.99	28763	2913.83
gene1058	-		1137	5438	489.197	8942	765.964	4017	370.047	6081	574.201	5350	457.418	5627	494.839
gene1059	naoX		1374	1319	98.189	2772	196.49	2187	166.716	1822	142.368	1406	99.476	2918	212.347
gene1060	-		957	1015	108.482	639	65.0314	1064	116.451	1497	167.942	1436	145.869	1922	200.812
gene1061	-		1077	164	15.5752	157	14.1977	159	15.4631	256	25.5196	242	21.8434	299	27.7589
gene1062	-		1533	3121	208.236	2397	152.286	2875	196.431	3729	261.156	3953	250.671	3723	242.828
gene1063	-		1050	1199	116.798	982	91.087	1274	127.085	1755	179.447	1699	157.298	1827	173.979
gene1064	cdd		387	2555	675.281	2049	515.662	2485	672.559	3040	843.358	2697	677.469	3862	997.812
gene1065	deoC		663	3445	531.472	3423	502.837	3208	506.799	3905	632.349	3863	566.41	3623	546.389
gene1066	pdp		1278	1731	138.539	2108	160.647	1908	156.373	1939	162.891	1618	123.074	2999	234.635
gene1067	-		597	121	20.7308	166	27.0812	184	32.2819	174	31.2913	145	23.6109	367	61.4666
gene1068	coaA		921	1790	198.792	2780	293.981	1973	224.379	1592	185.581	2044	215.745	1814	196.936
gene1069	rs20		255	11	4.41222	13	4.9652	19	7.8042	10	4.21026	5	1.90612	33	12.9396
gene1070	ciaH		1308	10419	814.748	10462	779.006	6795	544.123	9702	796.348	10008	743.805	6170	471.655
gene1071	ciaR		675	2399	363.523	3159	455.806	1858	288.308	1792	285.025	2258	325.192	1679	248.711
gene122	-		750	905	123.422	1319	171.284	1057	147.614	832	119.1	1046	135.578	1071	142.783
gene123	-		933	75	8.22213	79	8.24669	54	6.06216	95	10.9318	72	7.50189	153	16.3967
gene1072	-		264	1080	418.432	1275	470.371	1178	467.365	874	355.432	1076	396.212	1140	431.766
gene1073	pepN		2550	13583	544.829	14665	560.113	13772	565.682	14763	621.561	16410	625.587	14945	586.008
gene1074	phoU		654	2318	362.527	3565	530.904	2285	365.952	2143	351.798	2355	350.052	1943	297.059
gene1075	-		759	4623	622.998	7211	925.311	4142	571.589	3965	560.855	4648	595.311	3162	416.55
gene1076	pstB		804	10928	1390.24	14797	1792.47	9571	1246.86	10070	1344.69	10790	1304.62	7841	975.131
gene1077	pstC		888	1083	124.744	1099	120.537	1433	169.024	1325	160.196	1392	152.386	1601	180.271
gene1078	pstC1		936	2071	226.313	1899	197.598	2728	305.27	2288	262.44	2607	270.76	3304	352.949
gene1079	pstS		864	4292	508.102	5107	575.687	4697	569.406	3953	491.205	4446	500.236	5019	580.832
gene1080	-		1311	848	66.1604	720	53.4889	952	76.0588	750	61.4197	658	48.7913	1098	83.7427
gene124	-		1401	22	1.60616	32	2.22457	26	1.94379	81	6.20721	47	3.26121	61	4.35351
gene1081	-		693	298	43.9833	360	50.5945	394	59.5495	354	54.8428	343	48.115	391	56.4145
gene1082	-		279	12	4.39928	21	7.33076	10	3.75414	11	4.2329	9	3.13587	3	1.07514
gene1083	-		414	1613	398.51	2301	541.315	1583	400.494	1577	408.96	1742	409.042	1433	346.093
gene1084	-		921	2322	257.874	2783	294.298	2429	276.238	2127	247.946	2347	247.727	2433	264.137
gene1085	truB		882	418	48.4744	403	44.5011	528	62.7019	452	55.0198	465	51.2512	602	68.2457
gene1086	-		1314	466	36.274	384	28.4623	325	25.9062	339	27.6983	497	36.7689	333	25.3394
gene1087	-		690	47	6.96712	68	9.59829	103	15.6352	57	8.86901	90	12.6798	83	12.0275
gene1088	-		186	3	1.64973	5	2.61813	5	2.81561	13	7.50377	13	6.79438	11	5.91326
gene1089	-		768	17	2.26408	16	2.02905	11	1.50019	28	3.91423	21	2.65814	18	2.34347
gene1090	-		741	1	0.138034	1	0.131436	1	0.14135	4	0.57955	6	0.787141	9	1.21443
gene125	-		453	41	9.25743	16	3.43998	35	8.09254	30	7.11004	52	11.159	39	8.60823
gene1091	-		729	0	0	0	0	0	0	0	0	2	0.266699	4	0.54863
gene1092	-		1368	9562	714.936	8308	591.486	8583	657.156	9027	708.446	10681	759.006	8008	585.309
gene1093	-		234	48	20.9812	45	18.7297	64	28.647	60	27.5286	63	26.1724	83	35.4658
gene1094	-		912	3464	388.497	3521	376.015	3116	357.864	3065	360.815	3128	333.42	3072	336.801
gene1095	-		297	62	21.3521	46	15.0847	55	19.3964	74	26.75	73	23.8938	99	33.3293
gene1096	-		456	3	0.672917	1	0.213584	1	0.229694	3	0.706327	5	1.06592	2	0.438543
gene1097	-		348	96	28.2161	74	20.7103	116	34.9135	85	26.2234	88	24.5823	145	41.6616
gene1098	-		3186	10596	340.174	15722	480.614	8100	266.29	6388	215.263	8423	257.004	6067	190.404
gene1099	-		1257	4229	344.118	4630	358.74	4584	381.966	3250	277.586	3762	290.94	3732	296.861
gene1100	-		165	13	8.05869	40	23.6108	19	12.061	16	10.4108	17	10.0158	34	20.6036
gene126	lacD2		990	74	7.64542	81	7.96863	43	4.54934	86	9.32637	89	8.73926	74	7.47384
gene1101	-		1023	3021	302.051	4033	383.961	2562	262.312	2215	232.46	2934	278.807	2154	210.532
gene1102	-		747	818	112.005	937	122.167	642	90.0181	643	92.4144	842	109.575	655	87.6735
gene1103	-		1746	2018	118.217	1677	93.5455	2280	136.775	2185	134.356	2476	137.856	2677	153.303
gene1104	-		1773	1594	91.9569	1283	70.4777	1822	107.635	1681	101.791	1622	88.9328	2439	137.547
gene1105	-		612	10	1.6713	15	2.38712	19	3.25175	3	0.526283	4	0.635372	22	3.59434
gene1106	-		2634	439	17.0472	416	15.382	470	18.6895	534	21.7658	561	20.7046	605	22.9661
gene1107	-		702	103	15.0074	129	17.8973	176	26.2598	166	25.3875	105	14.5402	250	35.6082
gene1108	-		549	47	8.7565	45	7.98315	35	6.67745	54	10.5602	51	9.03062	34	6.19233
gene1109	-		564	1715	311.021	2519	434.994	1571	291.751	1458	277.541	1713	295.255	1256	222.668
gene1110	ccdA		714	914	130.934	783	106.806	1151	168.847	945	142.096	909	123.761	1552	217.341
gene1111	-		771	231	30.6452	235	29.6857	225	30.5663	193	26.8752	229	28.8736	242	31.384
gene1112	-		741	2349	324.242	2306	303.092	2668	377.123	2632	381.344	2897	380.058	2978	401.841
gene1113	cysD		1314	13683	1065.1	15881	1177.11	13017	1037.6	12887	1052.95	13501	998.827	12213	929.34
gene1114	pcrA		2202	10422	484.104	10952	484.407	11951	568.463	11308	551.338	12517	552.589	13128	596.113
gene1115	-		1365	55	4.12131	36	2.56864	63	4.83418	85	6.68553	106	7.54906	81	5.93335
gene1116	-		1191	1641	140.929	2112	172.709	1448	127.342	1301	117.278	1706	139.247	1345	112.917
gene1117	-		834	1186	145.453	1695	197.942	1153	144.803	1341	172.628	1399	163.069	1246	149.382
gene1118	-		630	247	40.1016	283	43.7502	307	51.0403	291	49.5909	321	49.5318	301	47.772
gene1119	-		642	371	59.1077	362	54.9171	466	76.0267	503	84.1167	449	67.9878	584	90.9547
gene127	-		1356	353	26.6269	384	27.5807	420	32.4418	298	23.5942	404	28.9628	379	27.9465
gene1120	phnA		333	2530	777.108	3205	937.385	2917	917.503	2920	941.43	3068	895.634	3634	1091.16
gene1121	mtlD		1149	2047	182.223	2009	170.292	2094	190.885	2411	225.282	2900	245.357	2041	177.611
gene1122	mtlA2		438	98	22.8853	153	34.0213	103	24.6308	103	25.2472	110	24.414	109	24.8828
gene1123	-		1953	7064	369.959	8513	424.536	6185	331.706	7227	397.288	8459	421.053	6801	348.191
gene1124	mtlA1		1710	1791	107.128	2043	116.361	2074	127.036	2336	146.665	2452	139.394	3301	193.018
gene1125	glmS		1815	11076	624.182	10377	556.838	10302	594.511	9900	585.609	11452	613.373	8898	490.189
gene1126	lepB		555	29972	5523.67	39314	6899.03	24104	4548.95	24565	4751.96	28497	4991.44	21521	3877.19
gene1127	-		243	923	388.508	781	313.025	850	366.377	935	413.099	853	341.242	1001	411.884
gene128	-		843	2228	270.329	2243	259.141	2447	304.034	2270	289.1	2434	280.681	2649	314.197
gene129	adh		1119	1334	121.936	1347	117.239	1460	136.659	1131	108.513	1193	103.641	1440	128.671
gene1128	pykF		1503	16925	1151.79	17606	1140.87	13683	953.537	15053	1075.26	17568	1136.27	11441	761.119
gene1129	pfk		1014	21794	2198.39	18234	1751.37	24696	2550.96	22650	2398.17	20868	2000.61	30447	3002.3
gene1130	dnaE		3105	7592	250.092	6998	219.506	7556	254.886	7800	269.701	8097	253.502	7868	253.367
gene1131	-		372	2622	720.932	4592	1202.24	2894	814.837	1836	529.882	2097	547.993	2905	780.819
gene1132	-		708	1311	189.398	2690	370.044	1524	225.459	837	126.923	1018	139.776	1340	189.243
gene1133	-		819	5875	733.717	9596	1141.14	4288	548.386	3861	506.134	4317	512.41	4067	496.521
gene1134	-		621	686	112.989	917	143.817	1157	195.145	847	146.434	1030	161.237	1547	249.084
gene1135	-		615	308	51.2248	305	48.3013	238	40.5338	255	44.5158	265	41.8881	239	38.8571
gene9	-		1215	1697	142.86	2660	213.226	1970	169.826	1927	170.276	2350	188.023	2175	178.991
gene130	-		189	50	27.0591	19	9.79097	87	48.2139	49	27.8345	63	32.404	135	71.4199
gene1137	rs1		1200	5712	486.869	5260	426.912	7800	680.814	7778	695.883	6900	558.969	10996	916.222
gene1140	-		162	171	107.966	379	227.855	231	149.352	165	109.35	148	88.8109	276	170.35
gene1141	ilvE		1026	4309	429.57	4065	385.875	4772	487.156	4041	422.854	5056	479.048	5151	501.986
gene1142	parC		2457	10884	453.094	11092	439.682	11006	469.18	11180	488.524	12023	475.694	11106	451.96
gene1143	-		489	3636	760.536	5898	1174.71	3167	678.351	2898	636.266	3523	700.363	2478	506.687
gene1144	-		558	1929	353.592	2322	405.286	1858	348.76	1776	341.71	2015	351.043	1846	330.784
gene1145	fic		606	2376	401.032	2264	363.863	2942	508.493	2312	409.604	2545	408.258	3203	528.484
gene1146	-		756	5281	714.495	6121	788.56	6564	909.415	5307	753.662	6508	836.846	5359	708.777
gene1147	-		1341	5255	400.819	6717	487.844	5219	407.637	4508	360.915	5002	362.606	4701	350.517
gene131	dinF		1329	69	5.31042	42	3.07793	51	4.01939	62	5.0086	63	4.60824	72	5.41695
gene1148	parE		1950	1779	93.3139	1693	84.5583	2174	116.772	1714	94.3682	1901	94.7692	2818	144.495
gene1149	-		639	103	16.487	146	22.2529	160	26.2261	165	27.7225	159	24.1889	213	33.3293
gene1150	-		2115	12662	612.346	10975	505.392	12346	611.408	13087	664.323	14350	659.57	14012	662.426
gene1151	pyrC		1269	6031	486.108	4621	354.657	5800	478.72	6030	510.158	6715	514.404	6436	507.11
gene1152	ung		654	1317	205.974	958	142.666	1540	246.637	1225	201.098	1288	191.451	1602	244.924
gene1153	-		654	342	53.4876	253	37.677	388	62.1397	381	62.5456	354	52.6193	607	92.8022
gene1154	-		852	1417	170.112	1666	190.445	1230	151.21	1435	180.826	1341	153.006	1509	177.091
gene1155	nylA		1443	657	46.5697	574	38.7418	830	60.2458	686	51.0396	749	50.4586	1211	83.9122
gene1156	-		342	645	192.903	650	185.106	840	257.258	706	221.63	693	196.982	1025	299.671
gene1157	-		501	1095	223.553	1247	242.417	1079	225.579	1148	246.01	1323	256.709	1011	201.772
gene1158	pyrE		630	5526	897.171	5840	902.831	5539	920.886	5831	993.692	6436	993.105	5316	843.707
gene1159	pyrF		693	550	81.1772	567	79.6863	643	97.1836	698	108.136	525	73.6454	880	126.969
gene1160	pyrDB		930	118	12.9779	83	8.69219	112	12.6139	187	21.5878	158	16.5156	391	42.0379
gene1161	pyrK		777	431	56.7363	528	66.1831	451	60.7954	366	50.5719	445	55.6748	818	105.264
gene1162	cpsY		909	13358	1503.08	14281	1530.13	12520	1442.63	11624	1372.91	14070	1504.7	10919	1201.06
gene1163	-		768	3096	412.33	2723	345.319	2554	348.317	3045	425.672	3803	481.376	2262	294.496
gene1164	deoD		705	3853	559.004	2934	405.326	3826	568.422	3968	604.271	4709	649.321	5030	713.389
gene1165	-		711	3770	542.346	3056	418.618	3650	537.698	3678	555.381	4224	577.529	3975	559.004
gene1166	punA		810	12486	1576.68	9831	1182.08	12094	1563.87	11382	1508.63	11411	1369.49	13223	1632.27
gene132	-		4398	32416	753.892	35195	779.399	29998	714.418	32567	795.009	32880	726.769	30583	695.3
gene1167	-		477	2954	633.428	2656	542.305	2492	547.199	2477	557.515	2720	554.332	2540	532.43
gene1168	-		96	865	921.615	944	957.712	777	847.745	714	798.502	469	474.921	574	597.844
gene1169	-		216	107	50.6681	121	54.5589	115	55.7647	93	46.2252	90	40.505	88	40.7358
gene1170	deoB		1212	6781	572.263	5302	426.06	6097	526.901	5577	494.023	5902	473.387	5934	489.545
gene1171	rpiA		678	961	144.977	815	117.074	1046	161.591	925	146.474	973	139.509	1261	185.966
gene1172	thdF		1368	10412	778.49	8585	611.207	10500	803.93	8012	628.788	9739	692.067	8631	630.845
gene1173	-		804	24	3.05323	50	6.05687	33	4.29906	36	4.80724	26	3.14367	25	3.10908
gene1174	-		351	52	15.1531	84	23.3081	52	15.5171	43	13.1526	43	11.9092	75	21.3649
gene1175	-		588	1056	183.692	1002	165.968	1251	222.841	1430	261.101	1211	200.21	1661	282.449
gene1176	pepV		1413	52689	3814.02	56748	3911.49	44874	3326.35	49427	3755.53	52130	3586.45	45959	3252.19
gene133	-		450	12226	2778.92	12812	2772.93	13129	3055.87	12596	3005.17	14855	3209.07	14048	3121.4
gene1177	-		603	3551	602.335	3930	634.76	3546	615.938	3693	657.523	4359	702.731	3858	639.724
gene1178	uvrC		1788	9793	560.213	9263	504.566	8736	511.753	9708	582.923	10933	594.417	9484	530.361
gene1179	-		1071	323	30.8474	385	35.0111	230	22.4933	304	30.4743	421	38.2131	255	23.8066
gene1180	-		558	4048	742.012	3370	588.206	4316	810.144	3989	767.501	4231	737.103	4973	891.111
gene1181	-		297	1605	552.743	1409	462.05	1605	566.023	1550	560.305	1608	526.319	1784	600.601
gene1182	eno		1299	13354	1051.49	14487	1086.18	14505	1169.56	13171	1088.58	15300	1144.99	15299	1177.61
gene1183	-		642	8923	1421.61	13061	1981.41	7451	1215.61	6504	1087.66	8913	1349.61	8159	1270.72
gene134	-		555	1904	350.896	1511	265.158	1559	294.217	2141	414.165	2104	368.53	1902	342.661
gene1184	-		270	216	81.8267	292	105.33	232	89.9994	189	75.1532	267	96.1318	258	95.544
gene1185	-		453	1207	272.53	1486	319.488	1418	327.864	965	228.706	1350	289.704	1341	295.991
gene1186	grk		1113	7021	645.221	6150	538.163	6579	619.127	6741	650.247	6878	600.74	7060	634.245
gene1187	-		426	691	165.91	592	135.346	597	146.784	601	151.466	791	180.504	625	146.696
gene1188	-		645	4075	646.209	5205	785.95	3980	646.307	3341	556.117	4397	662.699	2801	434.211
gene1189	-		258	271	107.437	327	123.442	246	99.869	275	114.436	328	123.587	233	90.2992
gene1190	-		165	63	39.0536	102	60.2074	60	38.0875	43	27.9791	52	30.6365	52	31.5113
gene1191	-		672	3079	468.646	3335	483.349	2626	409.299	2753	439.831	3019	436.73	2779	413.492
gene1192	-		663	322	49.6761	372	54.6466	227	35.8614	399	64.6113	387	56.7436	304	45.8466
gene1193	-		327	254	79.4494	193	57.4835	188	60.2179	250	82.0808	235	69.8618	278	85.005
gene1194	-		180	64	36.3674	72	38.9578	55	32.0041	57	33.9979	45	24.303	56	31.1073
gene1195	-		186	49	26.9456	44	23.0395	61	34.3504	42	24.243	58	30.3134	81	43.5431
gene1196	-		1341	1683	128.369	1798	130.585	1305	101.929	1665	133.301	1879	136.213	1455	108.488
gene1197	hisI		330	5158	1598.72	5177	1527.91	4964	1575.55	5281	1718.11	5030	1481.75	5440	1648.29
gene1198	hisF		756	368	49.7887	313	40.3233	385	53.3401	388	55.101	434	55.8069	595	78.6942
gene1199	hisA		720	3183	452.178	3104	419.878	3553	516.866	3333	496.995	4277	577.466	3426	475.776
gene1200	hisH		606	263	44.3903	152	24.429	327	56.5185	313	55.4525	339	54.3809	602	99.3279
gene1201	-		363	525	147.93	771	206.862	539	155.524	508	150.247	444	118.904	456	125.605
gene1202	hisB		585	212	37.0668	221	36.7934	247	44.2238	267	49.001	205	34.0657	410	70.077
gene1203	serB		648	496	78.2909	410	61.623	628	101.508	526	87.1485	536	80.4099	802	123.75
gene135	adhA		996	9557	981.447	16362	1599.97	14521	1527.05	11742	1265.7	11421	1114.72	20687	2076.76
gene1204	hisD		1284	1061	84.5192	896	67.9637	1410	115.019	1057	88.3811	1181	89.4138	1778	138.457
gene1205	hisG		648	355	56.0348	347	52.1541	572	92.4562	403	66.7697	364	54.6067	673	103.845
gene1206	hisZ		963	224	23.7918	168	16.9909	187	20.339	185	20.625	146	14.7383	268	27.8263
gene1207	hisC		1050	1560	151.964	1495	138.671	1765	176.064	1415	144.683	1472	136.282	1863	177.407
gene1208	-		1725	36330	2154.18	40633	2294.16	31295	1900.21	30973	1927.72	37609	2119.45	26268	1522.6
gene1209	gyrB		1953	13278	695.401	12876	642.115	14130	757.801	11978	658.463	13126	653.356	14063	719.985
gene1210	-		585	2620	458.089	2308	384.25	3347	599.26	2289	420.087	2473	410.949	3579	611.721
gene1211	-		1227	1894	157.885	2138	169.706	2683	229.029	1953	170.886	2368	187.61	2916	237.624
gene136	adhB		1014	4294	433.141	4519	434.049	3584	370.208	4483	474.657	4340	416.075	4564	450.044
gene1212	-		1119	199	18.1898	245	21.3241	216	20.218	181	17.3659	195	16.9404	209	18.6751
gene1213	-		567	331	59.7104	397	68.1933	334	61.6991	268	50.7459	367	62.922	242	42.6756
gene1215	-		660	165	25.5708	175	25.8243	200	31.7396	220	35.7872	193	28.4271	216	32.7233
gene1216	-		1179	323	28.0216	399	32.9604	379	33.6698	432	39.3386	466	38.423	568	48.1706
gene1217	-		351	1031	300.439	1271	352.673	949	283.188	628	192.089	485	134.324	879	250.397
gene1218	rl19		348	645	189.577	759	212.421	738	222.122	839	258.84	889	248.337	925	265.772
gene1219	-		1221	720	60.3145	553	44.1106	884	75.8319	932	81.9501	926	73.725	1294	105.966
gene137	adhC		1368	6158	460.424	5080	361.669	5115	391.629	6865	538.77	6338	450.387	6135	448.411
gene1220	-		1221	1273	106.639	744	59.346	1872	160.585	1773	155.899	1936	154.138	3095	253.45
gene1221	-		273	73	27.3505	127	45.308	102	39.1339	92	36.1805	105	37.3892	136	49.8108
gene1222	-		678	32061	4836.73	26343	3784.16	30136	4655.55	35066	5552.72	35701	5118.83	34606	5103.51
gene1223	-		1383	13633	1008.26	14044	989.014	11495	870.567	11494	892.274	13149	924.252	12132	877.117
gene1224	flaW		444	4971	1145.16	6625	1453.24	5366	1265.85	3706	896.131	3694	808.786	4836	1089.06
gene1225	add		1050	2170	211.386	2289	212.32	2700	269.333	1651	168.813	1911	176.926	2488	236.924
gene1226	-		792	1081	139.606	1074	132.073	1424	188.322	823	111.564	962	118.078	1381	174.348
gene1227	-		933	2809	307.946	2462	257.004	3727	418.401	1944	223.699	2023	210.782	4681	501.654
gene1228	rl31		243	16760	7054.6	21935	8791.55	18477	7964.17	18083	7989.39	18342	7337.7	20728	8529.01
gene1229	-		324	80	25.2551	112	33.6672	62	20.043	72	23.8581	67	20.1025	39	12.0356
gene10	-		1272	3721	299.211	6112	467.983	3406	280.461	3357	283.344	4059	310.207	3267	256.809
gene138	adhD		1746	10031	587.631	7708	429.963	8860	531.502	11019	677.559	10701	595.799	11165	639.384
gene1230	-		348	12	3.52701	14	3.91817	17	5.11664	9	2.77659	13	3.63148	11	3.16054
gene1231	-		756	1575	213.09	2157	277.883	1416	196.181	1688	239.718	1969	253.188	1174	155.272
gene1232	adcA		1521	1854	124.677	2148	137.543	1723	118.651	1898	133.973	2322	148.406	1804	118.592
gene1233	-		1401	4981	363.65	5664	393.749	5744	429.429	5461	418.488	6039	419.031	6888	491.589
gene1234	-		912	1113	124.826	1268	135.412	1008	115.766	1175	138.322	1352	144.112	931	102.071
gene1235	-		978	924	96.6358	1060	105.56	923	98.8503	815	89.4681	1016	100.989	784	80.1539
gene1236	-		891	1613	185.166	1881	205.61	1745	205.132	1445	174.116	1802	196.606	1555	174.502
gene1237	-		759	745	100.397	812	104.195	769	106.121	698	98.7331	759	97.2119	714	94.0598
gene1238	aldR		378	339	91.7303	381	98.1674	396	109.728	344	97.7048	330	84.8676	576	152.363
gene1239	-		1092	2890	270.695	3654	325.897	3045	292.065	2773	272.632	3476	309.44	2978	272.678
gene139	lplA		990	15285	1579.19	12607	1240.25	11638	1231.28	15587	1690.35	15369	1509.14	11411	1152.49
gene1240	-		138	31	22.9767	27	19.0554	38	28.8416	49	38.1212	41	28.8818	58	42.0239
gene1241	asnS		1347	5785	439.279	5245	379.238	7048	548.042	6081	484.682	6855	494.72	6823	506.472
gene1242	aspB		1182	2725	235.805	3466	285.591	3415	302.614	2724	247.422	3174	261.041	3144	265.958
gene1243	-		2463	7556	313.785	8888	351.458	8045	342.119	7531	328.275	8612	339.906	7890	320.302
gene1244	-		684	1047	156.565	1272	181.119	1572	240.72	1224	192.121	1484	210.91	2248	328.615
gene1245	-		654	143	22.3647	176	26.2101	197	31.5503	205	33.6531	168	24.9719	190	29.0485
gene1246	-		732	46	6.42764	39	5.18905	39	5.58044	54	7.92012	68	9.03062	49	6.69318
gene1247	-		228	64	28.7111	54	23.0671	42	19.2943	61	28.724	73	31.1249	55	24.1199
gene1248	-		705	1060	153.788	761	105.131	1241	184.373	1268	193.099	1135	156.504	1649	233.872
gene140	-		1137	13662	1229.02	13896	1190.32	12015	1106.82	14924	1409.2	16676	1425.78	12094	1063.55
gene1249	-		1179	1677	145.487	1542	127.381	1700	151.026	1655	150.707	1795	148.003	1753	148.667
gene1250	budC		765	1998	267.14	1705	217.069	2441	334.212	1451	203.636	1820	231.275	2525	330.025
gene1251	-		639	751	120.211	707	107.759	858	140.638	793	133.236	828	125.965	1047	163.83
gene1252	ftsX		936	11535	1260.51	12988	1351.45	8325	931.587	8444	968.549	8977	932.341	7158	764.651
gene1253	ftsE		693	4455	657.536	4453	625.826	3176	480.024	3901	604.355	3717	521.41	2690	388.12
gene1254	rf2		978	12162	1271.95	10635	1059.09	10832	1160.07	11165	1225.66	11196	1112.87	11633	1189.32
gene1255	-		1122	190	17.3207	153	13.2811	142	13.2559	148	14.1618	210	18.1947	163	14.5259
gene1256	-		474	1126	242.977	907	186.364	1301	287.484	1016	230.125	1109	227.443	1318	278.025
gene1257	-		141	7	5.0779	7	4.83518	8	5.94273	0	0	5	3.44723	0	0
gene1258	-		546	1258	235.664	1044	186.227	1336	256.288	1121	220.426	1255	223.445	1080	197.778
gene1259	-		264	338	130.954	210	77.4728	292	115.85	252	102.482	290	106.786	356	134.832
gene1260	sfp		693	1071	158.074	1476	207.437	794	120.006	1113	172.429	1377	193.161	742	107.058
gene1261	-		984	4666	485.014	6966	689.481	3750	399.164	4301	469.271	4767	470.944	3400	345.487
gene1262	pksD		939	1789	194.872	2714	281.5	1425	158.951	1706	195.058	1987	205.708	1339	142.581
gene1263	-		750	1077	146.879	1339	173.881	691	96.501	1034	148.016	1136	147.244	625	83.3233
gene1264	-		1155	424	37.5482	505	42.5837	293	26.5706	370	34.3929	519	43.6822	385	33.3293
gene1265	bacD		4368	16926	396.348	26274	585.838	13551	324.941	15565	382.574	19628	436.831	12146	278.034
gene141	-		1395	78	5.71907	81	5.65516	87	6.53221	77	5.92606	75	5.22645	101	7.23927
gene142	-		654	576	90.0844	462	68.8015	434	69.5068	523	85.8565	598	88.888	531	81.1828
gene1266	bacA2		4887	10605	221.959	15404	306.991	9468	202.923	10322	226.762	12732	253.264	9132	186.84
gene1267	-		3690	7590	210.388	11386	300.524	6345	180.103	7140	207.74	8502	223.983	6637	179.843
gene1268	bacA1		8175	9773	122.277	14948	178.086	8771	112.377	9314	122.32	13340	158.631	8203	100.33
gene1269	-		3315	4258	131.379	7243	212.799	4167	131.66	4159	134.696	5924	173.721	4252	128.25
gene1270	-		1218	636	53.409	1223	97.7942	549	47.2107	630	55.5319	800	63.8502	587	48.1879
gene1271	-		1902	4261	229.143	7843	401.611	3881	213.722	4839	273.146	5895	301.296	3664	192.616
gene1272	bacT		720	1632	231.842	2701	365.364	1699	247.159	2601	387.844	3092	417.471	1460	202.753
gene1273	-		2343	0	0	0	0	0	0	0	0	0	0	0	0
gene1274	-		702	850	123.847	1414	196.176	1130	168.6	542	82.8918	427	59.1303	1261	179.608
gene1275	-		576	19650	3489.35	24047	4066.05	19969	3631.19	17340	3232.03	21322	3598.53	17178	2981.93
gene143	mleR		894	1353	154.798	1353	147.399	1733	203.038	1299	155.999	1692	183.985	2322	259.7
gene1276	-		369	349	96.7395	403	106.368	355	100.767	324	94.2688	215	56.6411	368	99.7169
gene1277	-		324	59	18.6257	64	19.2384	41	13.2542	43	14.2486	48	14.4018	30	9.25814
gene1278	-		156	53	34.7501	75	46.8242	61	40.9563	60	41.293	55	34.2734	49	31.4065
gene1279	-		261	53	20.7702	40	14.9263	55	22.0718	53	21.8014	46	17.1331	25	9.57739
gene1280	-		294	8	2.78322	13	4.30656	3	1.06878	10	3.65176	11	3.63718	4	1.36038
gene1281	-		291	9	3.1634	8	2.67751	11	3.95927	3	1.10682	1	0.334062	7	2.40521
gene1282	-		237	2	0.86315	1	0.410947	0	0	0	0	0	0	0	0
gene1283	-		102	0	0	1	0.954847	0	0	0	0	1	0.953058	0	0
gene1284	-		111	2	1.84294	12	10.5291	5	4.71805	18	17.41	23	20.143	6	5.40475
gene1285	-		129	940	745.32	966	729.325	578	469.303	593	493.531	832	626.979	491	380.574
gene1286	-		582	445	78.2063	472	78.9865	431	77.5657	310	57.1858	484	80.8429	449	77.1384
gene1287	-		282	286	103.734	281	97.049	251	93.2266	273	103.935	332	114.448	299	106.016
gene1288	-		2346	11	0.479589	13	0.539696	17	0.75899	13	0.594928	18	0.745872	23	0.980274
gene1289	-		702	0	0	0	0	0	0	0	0	0	0	0	0
gene1290	-		600	58	9.88739	59	9.57712	49	8.55382	39	6.97851	49	7.93898	36	5.99927
gene1291	-		120	48	40.9133	48	38.9578	56	48.879	54	48.3128	37	29.9737	57	47.4943
gene1292	-		123	17	14.1367	13	10.2937	23	19.5856	13	11.3472	35	27.6619	27	21.9486
gene144	-		354	40	11.5574	31	8.52889	43	12.7227	19	5.76235	45	12.3575	60	16.9471
gene145	mleS		1623	345	21.7423	341	20.463	216	13.9396	388	25.6663	311	18.6278	298	18.3588
gene1293	-		618	61	10.0959	45	7.09183	90	15.2535	63	10.9446	89	13.9998	84	13.5906
gene1294	-		243	115	48.4057	156	62.5248	115	49.5686	132	58.3199	100	40.0049	124	51.0226
gene1295	-		183	82	45.8319	69	36.7225	65	37.203	65	38.1339	59	31.3416	78	42.6178
gene1296	-		204	22	11.0306	25	11.9356	21	10.7821	14	7.36796	38	18.1081	18	8.82246
gene1297	-		606	4958	836.833	4669	750.387	4339	749.95	3914	693.422	3981	638.615	4285	707.01
gene1298	-		786	3191	415.249	3047	377.558	3431	457.208	3587	489.957	3791	468.868	4478	569.651
gene1299	-		537	210	39.9991	280	50.7829	214	41.7402	233	46.5834	332	60.1012	178	33.1431
gene1300	-		519	0	0	0	0	0	0	0	0	0	0	0	0
gene146	-		945	146	15.8025	136	14.0165	103	11.4162	164	18.6321	210	21.6027	181	19.1511
gene1302	leuD		591	2821	488.225	3104	511.527	2677	474.434	2871	521.549	3005	494.284	2474	418.562
gene1303	leuC		1386	3808	281.021	3420	240.324	4726	357.146	4275	331.148	3789	265.755	5462	394.036
gene1304	leuB		1035	747	73.8219	729	68.5995	839	84.9057	888	92.1132	908	85.2835	921	88.9747
gene1305	leuA		1566	1023	66.8173	964	59.9542	1021	68.2888	1012	69.3806	1113	69.0912	1056	67.4248
gene1306	urk		630	429	69.6501	482	74.5144	533	88.6139	354	60.327	551	85.0219	511	81.1013
gene1307	-		981	1453	151.496	1650	163.813	1987	212.151	1190	130.235	1383	137.048	1837	187.235
gene1308	-		1083	2234	210.989	2145	192.9	2388	230.952	1724	170.906	2012	180.601	2036	187.974
gene1309	pckA		1641	2929	182.564	2575	152.828	2750	175.525	3069	200.788	3156	186.96	3258	198.513
gene147	-		1185	1662	143.456	1121	92.1343	1339	118.353	1378	124.848	1431	117.393	1463	123.445
gene1310	-		657	378	58.8479	457	67.7462	426	67.914	344	56.2137	413	61.1089	432	65.7455
gene1311	-		609	5957	1000.5	6440	1029.92	5319	914.804	5746	1012.97	6228	994.148	5844	959.49
gene1312	-		477	5318	1140.34	5578	1138.92	4507	989.656	4417	994.165	4831	984.551	4402	922.74
gene1313	-		828	1772	218.896	1598	187.966	1927	243.762	1742	225.874	1695	199.003	1870	225.818
gene1314	lepA		1836	5706	317.881	5550	294.411	5966	340.35	5160	301.735	5702	301.908	5761	313.742
gene1315	-		129	67	53.1239	78	58.8896	44	35.7255	74	61.5873	80	60.2865	69	53.4819
gene1316	gbpC		1752	7693	449.124	8210	456.397	7712	461.05	8341	511.132	7833	434.624	9153	522.368
gene1317	-		240	85	36.2253	110	44.6391	76	33.1679	106	47.4181	123	49.8211	127	52.9103
gene1318	-		855	928	111.016	1180	134.416	959	117.481	813	102.088	940	106.876	978	114.372
gene11	hprT		543	456	85.8954	447	80.1755	435	83.9083	515	101.826	548	98.1071	563	103.671
gene148	-		1296	1691	133.458	1148	86.2722	1147	92.6987	1520	125.918	1449	108.688	1285	99.1392
gene1319	-		378	1242	336.074	1746	449.869	1275	353.292	1424	404.452	1319	339.213	1211	320.332
gene1320	-		573	127	22.6701	109	18.527	86	15.7202	112	20.9852	100	16.9654	85	14.8324
gene1321	-		330	0	0	1	0.295135	0	0	0	0	1	0.294582	2	0.605987
gene1322	-		867	65	7.6683	38	4.26873	50	6.04041	43	5.32474	53	5.9426	56	6.45827
gene1323	-		4038	1073	27.1793	1412	34.0567	886	22.9817	971	25.8168	1095	26.3613	796	19.7103
gene1324	-		867	126	14.8647	162	18.1983	141	17.0339	95	11.764	134	15.0247	188	21.6813
gene1325	-		837	0	0	0	0	0	0	0	0	1	0.116143	0	0
gene1326	-		519	0	0	0	0	0	0	0	0	0	0	0	0
gene1327	-		867	1306	154.074	1160	130.309	1275	154.03	1141	141.291	1330	149.126	1022	117.863
gene149	-		702	1214	176.883	879	121.951	1021	152.336	1041	159.207	939	130.031	693	98.706
gene1328	-		1434	232	16.5479	231	15.6891	218	15.9229	231	17.2947	205	13.8971	212	14.782
gene1329	-		1176	32	2.78322	25	2.07046	52	4.63139	40	3.65176	61	5.04246	66	5.61157
gene1330	-		2529	2455	99.2905	2819	108.563	2511	103.995	2343	99.4656	2868	110.243	2217	87.6525
gene1331	-		660	593	91.9	599	88.3928	619	98.234	677	110.127	670	98.6849	677	102.563
gene1332	-		774	2135	282.138	2233	280.984	1950	263.881	2142	297.117	2203	276.69	2084	269.218
gene1333	-		618	472	78.1193	539	84.9443	476	80.674	461	80.0869	496	78.0212	410	66.335
gene1334	-		729	682	95.6889	690	92.184	646	92.8154	531	78.2017	564	75.2092	586	80.3744
gene1335	hemN		1143	1745	156.154	2024	172.464	1637	150.009	1483	139.298	1673	142.288	1471	128.681
gene1336	-		597	2233	382.577	2207	360.049	2884	505.983	1984	356.793	2472	402.526	2435	407.823
gene1337	-		567	1114	200.959	1189	204.236	1112	205.417	1051	199.007	1161	199.053	905	159.593
gene1338	pdhC		1254	220	17.9444	176	13.6694	212	17.7073	295	25.2565	230	17.8299	182	14.5118
gene1339	pdhB		1032	122	12.0916	80	7.54995	129	13.0926	145	15.0847	132	12.4341	111	10.7545
gene1340	pdhA		1074	101	9.61882	71	6.43855	104	10.1425	163	16.2942	131	11.8573	101	9.40296
gene1341	pdhD		1338	342	26.1442	338	24.6034	309	24.189	604	48.4652	383	27.8267	454	33.9271
gene1342	clpB		2583	717	28.3922	755	28.468	662	26.8441	700	29.0953	807	30.3717	945	36.5809
gene1343	-		1350	4865	368.599	4022	290.163	5107	396.23	5225	415.529	5824	419.38	6679	494.681
gene1344	-		957	10733	1147.13	10776	1096.68	8586	939.711	9181	1029.98	10419	1058.36	8808	920.265
gene1345	-		855	1079	129.08	830	94.5466	1462	179.1	1302	163.491	1519	172.708	2480	290.023
gene1346	murC2		1344	1501	114.232	1589	115.149	2194	170.983	1478	118.066	1877	135.764	2454	182.567
gene1347	cobQ		789	239	30.9832	210	25.9225	347	46.0646	261	35.5151	272	33.5129	414	52.4651
gene1348	-		1914	2894	154.654	2774	141.156	3696	202.258	2973	166.764	3486	177.054	4154	217.006
gene1349	-		888	1614	185.907	1803	197.75	1496	176.455	1664	201.182	1827	200.007	1478	166.421
gene1350	-		1164	2940	258.344	3071	256.957	2900	260.952	3281	302.623	3548	296.313	2996	257.357
gene1351	-		162	4	2.52551	4	2.4048	4	2.58619	3	1.98818	4	2.40029	2	1.23442
gene1352	-		789	697	90.3567	662	81.7175	772	102.484	823	111.988	827	101.894	1010	127.995
gene1353	epsC		1149	1398	124.449	1825	154.695	1634	148.952	1520	142.028	1724	145.86	1689	146.98
gene1354	-		699	1908	279.194	3075	428.452	2083	312.124	1941	298.124	2453	341.146	2136	305.542
gene150	-		615	8663	1440.78	7014	1110.77	8258	1406.42	5461	953.337	5787	914.741	5918	962.16
gene1355	-		552	10565	1957.65	13521	2385.63	9257	1756.49	8587	1670.14	9535	1679.2	8584	1554.88
gene1356	-		792	4020	519.165	3725	458.073	3811	503.998	3733	506.037	4052	497.352	4463	563.442
gene1357	-		1665	6144	377.435	4910	287.211	6255	393.485	6090	392.692	6794	396.671	7667	460.425
gene1358	-		759	3255	438.646	3385	434.361	4008	553.097	3279	463.819	3527	451.735	4014	528.79
gene1359	-		870	595	69.9524	602	67.3924	976	117.502	643	79.3489	649	72.5179	1244	142.971
gene1360	-		1002	2939	300.011	3700	359.64	3282	343.073	2822	302.37	3164	306.965	3471	346.365
gene1361	-		1650	4472	277.219	5576	329.134	4168	264.581	3581	233.007	4979	293.344	3980	241.183
gene151	-		648	4307	679.837	3807	572.192	3839	620.524	2684	444.689	3378	506.762	2512	387.607
gene152	-		1185	244	21.0609	195	16.0269	343	30.3173	140	12.6841	127	10.4185	274	23.1196
gene1362	-		1398	3428	250.806	3753	261.46	3343	250.464	3121	239.682	3964	275.642	3422	244.749
gene1363	aldB		717	4089	583.315	4037	548.37	3729	544.739	4841	724.878	5528	749.495	3826	533.548
gene1364	alsS		1680	2149	130.837	1788	103.655	2113	131.736	2690	171.906	2790	161.441	2877	171.229
gene1365	-		984	3625	376.806	3821	378.195	2958	314.861	3489	380.676	4139	408.903	2712	275.576
gene1366	-		1170	2863	250.288	2300	191.459	2958	264.806	3184	292.171	3123	259.481	3158	269.882
gene1367	mutX		480	261	55.6166	263	53.364	197	42.9873	237	53.0098	190	38.4797	255	53.1186
gene1368	-		129	52	41.2305	41	30.9548	34	27.6061	44	36.6195	14	10.5501	39	30.2289
gene1369	rmlB		1047	5045	492.855	4471	415.903	6332	633.446	5252	538.552	5396	501.008	7390	705.741
gene1370	-		174	1023	601.355	1077	602.838	1166	701.883	1092	673.787	983	549.192	1226	704.512
gene1371	rmlC		462	1390	307.736	1580	333.08	1576	357.297	1294	300.706	1358	285.744	1621	350.823
gene1372	rmlA		870	880	103.459	803	89.8939	1123	135.2	922	113.779	977	109.168	1548	177.91
gene1373	-		1104	2747	254.504	2742	241.898	3022	286.709	2501	243.217	2552	224.715	3160	286.197
gene1374	-		789	363	47.0581	344	42.4635	416	55.2245	393	53.4767	366	45.0945	412	52.2117
gene1375	-		699	220	32.1922	182	25.3588	261	39.1092	202	31.0258	220	30.596	255	36.4763
gene1376	-		696	248	36.4458	263	36.8028	357	53.7247	367	56.6117	306	42.7397	298	42.8109
gene1377	metA		945	1498	162.138	1565	161.293	1919	212.696	1580	179.504	1559	160.374	2425	256.583
gene1378	apt		519	1540	303.5	1753	328.964	1666	336.219	1299	268.714	1476	276.464	2259	435.207
gene1379	-		633	2116	341.914	2457	378.038	2126	351.783	1978	335.484	2540	390.076	2227	351.774
gene1380	-		900	602	68.4162	601	65.0378	661	76.9262	580	69.1886	604	65.24	604	67.103
gene1381	recJ		2205	5679	263.432	5763	254.551	6561	311.657	5254	255.818	5843	257.601	6921	313.84
gene1382	-		765	2018	269.814	3013	383.594	2033	278.35	1840	258.229	1887	239.789	1692	221.15
gene1383	-		930	9645	1060.78	11928	1249.16	10741	1209.7	8483	979.3	10022	1047.59	8759	941.714
gene1384	-		636	2116	340.301	2801	428.934	2416	397.883	1976	333.564	2265	346.203	2379	374.011
gene1385	-		1248	5314	435.524	5747	448.498	7258	609.141	5545	477.02	6627	516.205	8403	673.236
gene1386	miaA		885	286	33.0543	356	39.1779	326	38.5824	264	32.0265	337	37.0174	320	36.1538
gene1387	-		177	86	49.697	171	94.0929	166	98.2313	137	83.0991	95	52.1759	218	123.149
gene153	adhE		2670	13221	506.475	8721	318.119	10322	404.919	13345	536.607	14125	514.277	11217	420.062
gene1388	-		642	2651	422.357	2531	383.965	3665	597.935	2834	473.93	3228	488.785	3932	612.387
gene1389	-		627	1442	235.235	1199	186.245	1505	251.411	1458	249.654	1786	276.907	1725	275.086
gene1390	-		456	223	50.0201	159	33.9599	209	48.0061	224	52.7391	218	46.4741	307	67.3164
gene1391	-		1320	696	53.9312	655	48.3283	784	62.2096	723	58.8049	704	51.8464	826	62.5682
gene1392	-		1704	1087	65.2476	1336	76.3609	972	59.7464	777	48.9554	948	54.0827	774	45.417
gene1393	-		735	146	20.3175	111	14.7085	163	23.2282	98	14.3149	121	16.0036	198	26.9355
gene1394	-		1146	4461	398.155	5876	499.38	4252	388.619	5006	468.981	5855	496.663	5068	442.18
gene1395	-		270	18	6.81889	3	1.08216	9	3.49135	13	5.16927	9	3.2404	18	6.66586
gene1396	lacX		897	162	18.4726	130	14.1151	149	17.3984	149	17.8338	140	15.1724	112	12.4846
gene154	-		303	834	281.532	647	207.968	617	213.284	919	325.628	937	300.619	560	184.796
gene1397	lacG		1407	124	9.01431	100	6.92213	149	11.0919	149	11.3695	127	8.77464	136	9.66479
gene1398	lacE		1707	124	7.43007	130	7.41727	129	7.91537	134	8.42792	164	9.33964	144	8.43483
gene1399	lacF		315	0	0	6	1.85513	0	0	0	0	0	0	1	0.317422
gene1400	lacD		978	13	1.35959	10	0.995853	7	0.749677	9	0.987991	16	1.59038	6	0.613423
gene1401	lacC		933	8	0.877027	13	1.35705	14	1.57167	10	1.15071	6	0.625157	9	0.964514
gene1402	lacB		516	19	3.76625	20	3.77498	7	1.4209	16	3.32904	22	4.1447	11	2.13153
gene1403	lacA		429	5	1.19211	10	2.27027	6	1.4649	13	3.25338	13	2.94582	11	2.56379
gene1404	lacR		756	334	45.1887	502	64.6719	344	47.6598	334	47.4323	423	54.3924	397	52.5069
gene1405	rexA		3639	5831	163.895	5761	154.188	6031	173.589	6066	178.966	6336	169.259	6252	171.785
gene12	ftsH		1971	24136	1252.52	24656	1218.34	21161	1124.51	25196	1372.44	29036	1432.09	21159	1073.39
gene155	-		204	52	26.0722	30	14.3227	34	17.4568	49	25.7879	36	17.155	43	21.0759
gene1406	rexB		3243	5003	157.793	5491	164.907	5130	165.686	4835	160.066	5270	157.973	5480	168.959
gene1407	-		246	73	30.3524	52	20.5874	70	29.8042	63	27.4951	57	22.5247	117	47.5552
gene1408	-		327	95	29.7153	108	32.167	79	25.3043	160	52.5317	140	41.6198	110	33.6351
gene1409	-		120	125	106.545	98	79.5388	154	134.417	120	107.362	169	136.907	159	132.484
gene1410	-		1281	130	10.38	113	8.59139	129	10.5477	129	10.8116	146	11.0796	149	11.6301
gene1411	-		324	22	6.94516	23	6.9138	18	5.81892	42	13.9173	23	6.90085	22	6.7893
gene1412	-		1116	391	35.8358	450	39.2719	287	26.936	305	29.3417	364	31.7071	322	28.8496
gene1413	rgg		858	1310	156.167	1761	199.897	1125	137.335	1094	136.892	1399	158.508	1018	118.634
gene156	-		237	175	75.5257	100	41.0947	174	76.8982	143	64.7794	187	76.7031	265	111.801
gene1414	syfB		2406	4562	193.939	4220	170.825	4757	207.087	4900	218.65	5490	221.818	5117	212.651
gene1415	-		522	493	96.6009	511	95.342	474	95.1093	417	85.7659	474	88.2729	381	72.9797
gene1416	syfA		1044	964	94.4455	1169	109.056	1161	116.479	886	91.1134	1075	100.099	1020	97.6893
gene1417	smc		3537	18807	543.863	23954	659.594	18844	558.025	17343	526.427	20875	573.735	18126	512.406
gene1418	rnc		696	1202	176.644	1209	169.181	1430	215.2	1122	173.074	1219	170.261	1662	238.764
gene1419	covX		804	13054	1660.7	12980	1572.36	11553	1505.06	14596	1949.07	14732	1781.25	13878	1725.91
gene1420	covS		1353	9612	726.642	11311	814.211	8178	633.089	9143	725.505	10921	784.665	7752	572.88
gene1421	covR		708	3760	543.2	4461	613.667	4175	617.644	4493	681.322	5177	710.828	4995	705.423
gene1422	glnQ		783	2817	367.985	2687	334.226	3088	413.077	3343	458.378	4069	505.179	4044	516.413
gene157	-		420	270	65.7536	289	67.0166	210	52.3703	252	64.417	302	69.9	252	59.9927
gene1423	-		813	2041	256.778	1518	181.851	2099	270.419	2505	330.801	2707	323.681	3282	403.641
gene1424	-		705	2657	385.485	1842	254.469	2142	318.233	3258	496.148	3577	493.23	3200	453.846
gene1425	glnP		651	4305	676.39	3456	517.043	3149	506.649	5179	854.111	5446	813.235	3927	603.153
gene1426	endA		882	6530	757.268	5808	641.345	7099	843.032	7038	856.702	6066	668.58	8211	930.84
gene1427	-		189	10	5.41182	4	2.06126	1	0.554183	2	1.1361	0	0	0	0
gene1428	murA		1272	2439	196.123	2356	180.394	2564	211.128	2485	209.744	2844	217.351	3029	238.1
gene1429	-		210	61	29.7109	71	32.9286	76	37.9061	70	35.7872	64	29.6265	75	35.71
gene1430	atpA		417	5744	1408.91	7031	1642.16	5413	1359.62	5643	1452.86	5666	1320.87	4869	1167.48
gene1431	atpB		1407	26934	1958	22707	1571.81	33774	2514.22	30638	2337.84	30216	2087.67	39546	2810.32
gene1432	atpC		879	19375	2254.54	20331	2252.7	14824	1766.41	16884	2062.22	18555	2052.07	13711	1559.65
gene158	-		102	514	515.428	671	640.702	471	483.655	457	481.022	589	561.351	375	367.603
gene1433	atpD		1506	26841	1822.97	28163	1821.33	30318	2108.58	26546	1892.45	29827	1925.33	28505	1892.53
gene1434	atpE		537	1211	230.661	1410	255.728	1060	206.751	1199	239.714	1296	234.612	932	173.536
gene1435	atpF		498	502	103.105	509	99.5457	498	104.741	546	117.71	544	106.191	461	92.5591
gene1436	atpG		720	2313	328.585	2064	279.197	2765	402.233	3072	458.076	2911	393.033	3724	517.16
gene1437	atpH		204	411	206.071	355	169.485	433	222.317	463	243.669	399	190.135	547	268.105
gene1438	phsG		2397	7886	336.507	7245	294.377	7382	322.568	8500	380.715	9598	389.253	8447	352.356
gene1439	glgA		1431	6682	477.608	6551	445.864	6161	450.948	7187	539.209	8054	547.131	5948	415.603
gene1440	glgD		1134	1294	116.715	1061	91.1247	1104	101.97	1327	125.634	1388	118.986	1218	107.394
gene1441	glgC		1146	4011	357.992	3716	315.809	3615	330.399	4010	375.672	4279	362.975	3997	348.736
gene1442	glgB		1887	27716	1502.32	31030	1601.56	25624	1422.3	26095	1484.69	25752	1326.66	29498	1563.03
gene159	-		270	292	110.618	414	149.338	403	156.335	302	120.086	348	125.295	361	133.688
gene1443	pulA		2232	53583	2455.49	61231	2671.84	46710	2191.95	46606	2241.8	52763	2298.03	39533	1770.98
gene1444	-		1044	2503	245.225	2292	213.82	2754	276.299	2134	219.454	2150	200.197	2927	280.33
gene1445	dnlJ		1959	12729	664.607	11456	569.551	14137	755.854	11059	606.081	11183	554.937	16174	825.525
gene1446	-		513	141	28.113	137	26.0098	210	42.8763	194	40.6007	182	34.4884	364	70.9466
gene1447	-		459	661	147.297	763	161.9	765	174.568	584	136.6	671	142.112	888	193.441
gene1448	-		597	1414	242.259	1332	217.302	1521	266.852	1809	325.322	1766	287.565	1707	285.895
gene1449	-		1011	940	95.1002	892	85.9306	1105	114.479	1172	124.459	1105	106.25	1357	134.207
gene160	pnpA		2193	1988	92.722	2352	104.456	2708	129.338	2155	105.501	2371	105.102	3071	140.02
gene1450	-		738	90	12.4736	66	8.71007	81	11.4959	103	14.9841	83	10.9331	113	15.3098
gene1451	-		882	314	36.4138	305	33.6795	264	31.3509	364	44.308	303	33.3959	300	34.0095
gene1452	-		366	344	96.1351	507	134.915	307	87.8562	440	129.069	357	94.8215	243	66.3854
gene1453	-		195	2	1.04906	1	0.499458	8	4.29705	15	8.25859	3	1.49557	5	2.56379
gene1454	-		198	355	183.387	437	214.956	429	226.938	353	191.407	255	125.197	438	221.185
gene1455	-		933	5265	577.194	5232	546.16	4943	554.912	4691	539.8	4958	516.588	4739	507.87
gene1456	ampM		861	9675	1149.35	8968	1014.44	9645	1173.31	8365	1043.07	8855	999.781	9223	1071.07
gene1457	-		1284	2005	159.718	1953	148.14	1859	151.646	1761	147.246	1796	135.976	1858	144.687
gene1458	-		555	2237	412.266	2288	401.511	2368	446.893	1713	331.37	1409	246.796	2521	454.179
gene161	-		741	127	17.5303	103	13.538	139	19.6477	136	19.7047	133	17.4483	136	18.3514
gene1459	-		414	27	6.67065	18	4.23454	31	7.8429	25	6.48319	24	5.63547	49	11.8343
gene1460	trkB		660	32403	5021.65	35015	5167.07	29314	4652.07	26421	4297.88	26645	3924.56	25687	3891.5
gene1461	trk		654	25756	4028.15	32782	4881.93	21954	3516.02	19677	3230.21	22659	3368.08	17460	2669.4
gene1462	pacL		2793	47403	1735.96	41721	1454.85	48652	1824.5	40378	1552.11	42352	1474.09	46973	1681.61
gene1463	glgP		2277	2657	119.353	2692	115.145	2461	113.205	2080	98.073	2738	116.893	2365	103.852
gene1464	malQ		1530	1255	83.8991	1224	77.9155	1524	104.33	1121	78.6617	1249	79.358	1670	109.137
gene1465	malR		1020	4484	449.646	4892	467.111	4305	442.067	3515	369.977	4655	443.649	3773	369.857
gene1466	malX		1248	202	16.5555	257	20.0564	208	17.4568	229	19.7002	288	22.4335	327	26.1988
gene1467	malF		1362	207	15.5453	160	11.4413	192	14.7652	180	14.1888	221	15.7737	184	13.5079
gene162	cysE		669	343	52.4412	378	55.03	490	76.7159	480	77.0308	445	64.6627	497	74.281
gene1468	malG		837	35	4.27708	32	3.72356	38	4.75525	36	4.61771	43	4.99416	43	5.13677
gene1469	-		1134	148	13.3491	89	7.64383	153	14.1317	130	12.3078	133	11.4014	141	12.4324
gene1470	murZ		1260	6515	528.87	5394	416.941	6849	569.34	6929	590.404	6161	475.336	8276	656.746
gene1471	metK		1194	897	76.841	691	56.3648	1328	116.495	902	81.1057	815	66.3549	1592	133.317
gene1472	-		1059	6353	613.603	7779	715.421	4917	486.317	4219	427.723	5546	509.101	4130	389.943
gene1473	-		285	218	78.2378	333	113.798	163	59.9043	150	56.5061	168	57.3039	142	49.8185
gene1474	-		2049	3502	174.815	5952	282.914	3215	164.344	1949	102.122	2679	127.101	2491	121.557
gene1475	-		3750	2646	72.1711	3588	93.187	2572	71.8381	1835	52.5356	2328	60.3492	2298	61.2726
gene1476	birA		936	1399	152.879	1244	129.443	1377	154.09	1084	124.338	1100	114.245	1612	172.201
gene1477	-		201	0	0	0	0	0	0	0	0	0	0	1	0.497452
gene163	cysS		1344	1080	82.192	965	69.9298	1217	94.8433	1293	103.288	1124	81.2993	1619	120.447
gene1478	dnaX		1677	92737	5656.2	81509	4733.76	106397	6645.25	73863	4728.72	95677	5546.18	112613	6714.33
gene1479	-		498	1784	366.413	1968	384.884	1873	393.934	1245	268.404	1639	319.941	1609	323.053
gene1480	-		1770	41499	2398.11	43743	2406.96	46374	2744.2	22380	1357.49	33550	1842.63	29094	1643.53
gene1481	-		525	165	32.1462	250	46.3783	154	30.7239	143	29.2433	212	39.2551	181	34.472
gene1482	syt1		1950	4618	242.228	3751	187.347	4577	245.845	5328	293.345	5378	268.106	5799	297.349
gene1483	-		639	3618	579.125	3062	466.701	3650	598.284	3570	599.814	3957	601.984	4206	658.136
gene1484	-		1335	16204	1241.5	12906	941.552	15756	1236.17	15948	1282.55	16707	1216.57	16978	1271.61
gene1485	-		999	12681	1298.35	12088	1178.48	11637	1220.09	11635	1250.4	12609	1226.97	11608	1161.82
gene164	-		420	371	90.3503	574	133.106	361	90.0271	501	128.067	399	92.3513	314	74.7529
gene1486	amyA		1461	12677	887.506	11833	788.821	11873	851.188	11158	819.946	11637	774.302	14235	974.215
gene1487	ccpA		1002	35515	3625.34	31023	3015.44	32498	3397.07	35671	3822.05	36831	3573.27	36323	3624.61
gene1488	pepQ		1080	164	15.5319	226	20.3807	185	17.9417	144	14.3149	204	18.3623	188	17.4053
gene1489	-		567	4509	813.396	3781	649.468	4906	906.274	4139	783.721	4550	780.096	4974	877.143
gene1490	cah		771	1200	159.196	1566	197.821	1039	141.149	1123	156.378	1241	156.472	1077	139.672
gene1491	ptcC		1359	14	1.05369	19	1.36166	15	1.15608	20	1.58001	18	1.28758	11	0.809321
gene1492	-		519	13	2.56201	6	1.12595	14	2.82537	9	1.86176	17	3.18421	12	2.31186
gene1493	ptcA		312	0	0	0	0	0	0	0	0	0	0	0	0
gene1494	celR		1992	1	0.051347	6	0.293357	3	0.157742	6	0.323379	2	0.0976024	3	0.150584
gene13	-		1416	586	42.3291	773	53.168	601	44.4556	753	57.0928	716	49.1552	626	44.2037
gene165	-		906	741	83.6556	646	69.4446	815	94.2203	787	93.2601	807	86.5894	962	106.168
gene1495	ptcB		318	0	0	1	0.306272	0	0	0	0	1	0.305698	1	0.314427
gene1496	bgl		1434	162	11.555	206	13.9911	210	15.3386	153	11.4549	143	9.69408	221	15.4096
gene1497	-		666	364	55.9026	297	43.4326	416	65.4236	342	55.1317	368	53.7147	506	75.9668
gene1498	lguL		393	808	210.292	1216	301.353	708	188.693	476	130.036	361	89.2965	409	104.059
gene1499	-		513	355	70.7809	531	100.812	380	77.5857	305	63.831	363	68.7874	402	78.3531
gene1500	-		1686	312	18.9279	308	17.7921	303	18.8235	258	16.429	318	18.3353	312	18.5031
gene1501	smpB		468	485	105.999	566	117.789	488	109.217	565	129.614	604	125.462	504	107.679
gene1502	vacB		2337	3448	150.908	3844	160.199	4012	179.811	3698	169.886	3654	151.995	4392	187.911
gene1503	-		237	165	71.2099	99	40.6837	218	96.3437	192	86.9765	174	71.3708	354	149.349
gene166	-		738	469	65.0012	520	68.6248	452	64.1501	516	75.0659	529	69.6817	435	58.936
gene1504	rl33		147	2	1.39161	14	9.27566	7	4.98765	13	9.49457	4	2.64522	5	3.40095
gene1505	-		1170	629	54.9882	563	46.8659	691	61.8596	791	72.5838	830	68.9623	1168	99.817
gene1506	-		837	3795	463.758	3757	437.169	3856	482.533	4520	579.779	5233	607.778	4497	537.211
gene1507	-		597	1084	185.72	1379	224.97	1077	188.954	1175	211.306	1391	226.502	1209	202.488
gene1508	fpg		822	5665	704.909	5102	604.509	6247	796.003	6180	807.172	7062	835.171	8403	1022.14
gene1509	-		525	3296	642.144	3425	635.383	3086	615.675	2993	612.064	3268	605.121	3222	613.64
gene1510	-		471	387	84.0417	294	60.794	362	80.5013	385	87.7585	335	69.1423	475	100.837
gene1511	era		900	1432	162.744	1377	149.013	1433	166.77	1421	169.512	1527	164.936	1780	197.754
gene1512	dagK		414	231	57.0711	189	44.4627	335	84.7539	266	68.9812	225	52.8326	486	117.377
gene1513	-		495	1119	231.222	1143	224.893	1123	237.624	1008	218.627	1314	258.054	1243	251.081
gene1514	phoH		966	1152	121.978	1192	120.18	1413	153.208	1375	152.818	1257	126.496	1844	190.867
gene1515	-		216	17	8.05008	6	2.7054	8	3.87928	7	3.47931	5	2.25028	11	5.09198
gene1516	pmsR		510	258	51.7433	214	40.8675	262	53.8079	321	67.5747	264	50.3215	360	70.5797
gene1517	-		861	6205	737.129	5538	626.446	7522	915.051	7215	899.668	6944	784.018	8983	1043.2
gene1518	rrf1		558	53196	9751.01	70190	12251.1	44541	8360.67	47370	9114.2	48057	8372.25	42939	7694.23
gene1519	pyrH		738	5938	822.979	5339	704.592	7255	1029.67	6392	929.886	6579	866.609	10373	1405.39
gene1520	rl1		690	5622	833.387	6177	871.892	7203	1093.4	6401	995.974	6041	851.098	8687	1258.83
gene1521	rl11		426	37614	9031.19	39736	9084.66	48379	11894.9	39602	9980.6	40159	9164.17	61310	14390.3
gene1522	-		354	7	2.02255	6	1.65075	4	1.18351	3	0.909845	4	1.09844	8	2.25961
gene1523	-		2277	4289	192.663	3665	156.763	4655	214.127	4408	207.839	4234	180.762	5592	245.557
gene167	-		993	939	96.7211	1307	128.192	993	104.741	844	91.252	844	82.6253	858	86.3944
gene1524	-		777	366	48.1798	452	56.6567	498	67.1311	348	48.0848	455	56.9259	483	62.1546
gene1525	pfs		696	8213	1206.97	6985	977.442	7631	1148.38	7516	1159.38	7486	1045.59	6710	963.964
gene1526	-		324	261	82.3949	338	101.603	150	48.491	187	61.9649	215	64.5079	165	50.9198
gene1527	-		552	758	140.454	814	143.621	719	136.428	630	122.532	581	102.319	583	105.603
gene1528	glmU		1380	7983	591.687	7583	535.175	8114	615.845	7235	562.871	7335	516.703	7178	520.082
gene1529	-		585	606	105.955	783	130.359	496	88.8057	553	101.489	537	89.2356	391	66.8295
gene1530	-		207	24	11.8589	31	14.5856	39	19.7337	26	13.485	20	9.39246	31	14.974
gene1531	-		162	53	33.4631	85	51.102	59	38.1463	65	43.0772	84	50.4062	52	32.0949
gene1532	metS		2010	3801	193.422	3631	175.94	4365	227.459	4245	226.741	4314	208.643	4984	247.93
gene168	-		555	380	70.0318	499	87.5672	425	80.2068	282	54.5513	365	63.9322	389	70.0816
gene169	-		747	1483	203.06	1384	180.447	1634	229.111	1294	185.979	1564	203.533	1778	237.99
gene1533	-		201	3198	1627.37	3822	1851.95	3622	1887.42	4278	2285.04	3430	1658.89	5309	2640.97
gene1534	-		633	1614	260.798	1910	293.876	1258	208.158	1186	201.155	1431	219.763	1348	212.928
gene1535	-		378	724	195.908	523	134.755	782	216.686	627	178.084	717	184.394	899	237.802
gene1536	-		804	10784	1371.92	15907	1926.93	8384	1092.22	9132	1219.44	12134	1467.13	9808	1219.75
gene1537	-		882	3048	353.469	3128	345.408	3649	433.332	2285	278.142	2599	286.456	3376	382.72
gene1538	-		639	6014	962.648	3494	532.545	6180	1012.98	6842	1149.56	6773	1030.39	9690	1516.25
gene1539	-		279	245	89.8187	278	97.0453	267	100.236	267	102.744	161	56.0972	350	125.433
gene1540	-		246	334	138.872	299	118.378	320	136.248	276	120.455	307	121.317	419	170.305
gene1541	exoA		828	4712	582.076	5629	662.117	6492	821.227	4443	576.097	5434	637.983	6467	780.944
gene170	-		861	3981	472.927	3604	407.676	4188	509.47	3540	441.417	3867	436.607	4482	520.495
gene1542	end3		624	334	54.7478	218	34.0256	352	59.0845	311	53.5088	337	52.5007	343	54.9613
gene1543	-		354	551	159.204	775	213.222	633	187.29	565	171.354	582	159.823	649	183.311
gene1544	ogt		495	724	149.602	536	105.461	839	177.53	786	170.477	980	192.46	1416	286.026
gene1545	serA		1182	8192	708.887	7939	654.157	7381	654.053	7870	714.836	8534	701.867	9464	800.58
gene1546	-		513	2002	399.164	1581	300.157	1964	400.995	2240	468.792	2207	418.22	2779	541.65
gene1547	-		141	758	549.864	738	509.766	697	517.76	776	590.87	696	479.855	1032	731.826
gene1548	serC		1092	3371	315.748	3380	301.459	3207	307.604	3262	320.709	3769	335.524	3995	365.798
gene1549	-		342	1019	304.756	1636	465.898	989	302.89	1340	420.657	1273	361.844	1148	335.632
gene1550	nrgA		1236	532	44.0249	462	36.4047	525	44.4894	742	64.4517	738	58.044	811	65.6069
gene1551	-		867	208	24.5386	159	17.8613	287	34.6719	311	38.5115	257	28.816	594	68.5038
gene171	-		516	2008	398.033	1496	282.368	1700	345.076	2020	420.292	2292	431.802	2182	422.817
gene1552	-		333	97	29.7942	151	44.1638	88	27.6792	70	22.5685	87	25.3977	106	31.828
gene1553	-		807	203	25.7293	161	19.4306	276	35.8221	218	29.0023	316	38.0656	303	37.5419
gene1554	holB		876	931	108.705	990	110.069	1217	145.513	988	121.088	994	110.307	1660	189.475
gene1555	kthY		639	362	57.9445	484	73.7698	398	65.2375	366	61.4935	415	63.1345	417	65.2503
gene1556	-		660	19320	2994.11	23098	3408.51	17183	2726.91	18533	3014.75	21183	3120.06	17179	2602.56
gene1557	livF		711	4917	707.352	3884	532.039	6099	898.471	6104	921.71	5647	772.09	8352	1174.54
gene1558	livG		765	6140	820.941	6141	781.829	6119	837.788	6265	879.243	6938	881.642	6371	832.71
gene1559	livM		957	3491	373.115	2966	301.851	4416	483.317	3721	417.443	3904	396.568	5725	598.151
gene1560	livH		870	471	55.3741	439	49.145	662	79.6992	541	66.7617	628	70.1714	901	103.551
gene1561	livK		1173	4132	360.302	5098	423.288	4736	422.891	3544	324.373	4664	386.527	4473	381.284
gene172	-		447	17	3.88997	12	2.61461	27	6.32662	22	5.28402	21	4.567	42	9.39484
gene1562	-		249	150	61.6165	165	64.5385	120	50.4774	94	40.5301	111	43.3354	130	52.2025
gene1563	-		441	825	191.346	739	163.207	1184	281.208	659	160.434	831	183.182	1324	300.19
gene1564	clpP		591	5570	963.99	6650	1095.89	5163	915.019	4428	804.395	5573	916.687	5077	858.949
gene1565	upp		630	1483	240.772	1537	237.611	1783	296.433	1417	241.479	1806	278.674	2266	359.639
gene1566	metC		1164	1711	150.349	1820	152.283	1413	127.147	1720	158.644	1997	166.78	1608	138.128
gene1567	metB		1095	20368	1902.56	26371	2345.56	18814	1799.63	16937	1660.63	21528	1911.21	21568	1969.44
gene1568	-		1614	4098	259.701	4201	253.503	5306	344.333	4173	277.584	4579	275.795	5939	367.923
gene1569	murE		1452	6428	452.808	8396	563.17	7923	571.529	5589	413.254	7273	486.93	7115	489.954
gene1570	-		1020	1775	177.993	2565	244.918	1877	192.743	1612	169.674	2069	197.188	1746	171.156
gene1571	-		510	4707	944.015	4670	891.827	4876	1001.4	4008	843.736	5406	1030.45	4425	867.542
gene173	-		195	477	250.201	366	182.802	342	183.699	492	270.882	474	236.3	383	196.386
gene1572	-		621	4049	666.9	4052	635.495	3813	643.118	3355	580.03	3789	593.134	3550	571.589
gene1573	-		375	465	126.831	467	121.288	652	182.109	449	128.548	468	121.321	1001	266.901
gene1574	-		576	268	47.5902	205	34.6629	204	37.0956	214	39.8878	242	40.8425	251	43.5711
gene1575	-		924	614	67.9675	464	48.908	601	68.1268	737	85.6337	728	76.5912	715	77.3716
gene1576	-		651	936	147.062	1024	153.198	901	144.964	851	140.345	942	140.666	893	137.157
gene1577	ppaC		933	1520	166.635	1635	170.675	1779	199.714	1554	178.821	1656	172.543	1649	176.72
gene1578	dltD		1266	8411	679.546	7422	570.98	7453	616.613	7310	619.916	8113	622.97	7298	576.392
gene1579	dltC		240	11	4.68799	5	2.02905	5	2.1821	9	4.02606	5	2.02525	12	4.9994
gene174	-		447	921	210.745	978	213.091	1014	237.6	1265	303.831	1152	250.533	1491	333.517
gene1580	dltB		1263	1504	121.801	1258	97.0088	1312	108.804	1219	103.621	1386	106.679	1374	108.775
gene1581	dltA		1551	13483	889.159	11331	711.525	13400	904.916	9586	663.552	11538	723.167	11816	761.739
gene1582	pflA		792	12446	1607.35	10560	1298.59	13633	1802.94	11117	1506.99	10784	1323.65	17062	2154.03
gene1583	hlyX		1338	14057	1074.59	14069	1024.1	15320	1199.27	12109	971.631	14606	1061.19	15073	1126.4
gene1584	-		1095	917	85.6564	842	74.8914	1102	105.41	871	85.3991	996	88.4229	1040	94.9657
gene1585	-		783	5342	697.826	5184	644.818	5577	746.026	4116	564.369	5220	648.08	4829	616.656
gene1586	-		546	449	84.1121	454	80.9836	531	101.863	429	84.3556	475	84.5708	621	113.723
gene1587	-		933	2830	310.248	2578	269.113	2647	297.158	2903	334.052	2786	290.281	3017	323.326
gene175	-		393	160	41.6421	136	33.7039	186	49.5719	212	57.9152	218	53.9242	335	85.2314
gene1588	-		696	139	20.4273	114	15.9525	158	23.7773	162	24.9894	171	23.884	186	26.7209
gene1589	-		342	112	33.4963	173	49.2668	124	37.9761	141	44.2631	87	24.7294	161	47.0703
gene1590	-		651	3410	535.77	3431	513.303	3872	622.974	3392	559.402	3438	513.387	3178	488.113
gene1591	-		627	770	125.611	874	135.762	807	134.81	790	135.272	885	137.213	946	150.859
gene1592	-		327	1024	320.3	1749	520.926	1661	532.031	846	277.761	920	273.501	1473	450.404
gene1593	-		597	321	54.9966	391	63.7876	356	62.4584	257	46.2177	359	58.4574	324	54.2648
gene1594	-		828	2949	364.292	2936	345.35	2206	279.055	2136	276.962	2643	310.303	1936	233.788
gene1595	-		549	478	89.0554	510	90.4757	648	123.628	447	87.4147	471	83.4004	590	107.455
gene1596	trkA		1356	21882	1650.56	27148	1949.9	24949	1927.12	18207	1441.54	19208	1377.03	23648	1743.74
gene1597	trkH		1440	13129	932.554	11766	795.793	13175	958.304	11164	832.351	12981	876.325	12352	857.674
gene1598	-		255	36	14.44	52	19.8608	27	11.0902	45	18.9462	50	19.0612	21	8.2343
gene1599	rluB		723	7511	1062.59	7302	983.643	6371	922.964	6687	992.984	7267	977.094	5418	749.287
gene1600	-		597	2045	350.367	2462	401.65	1428	250.535	1696	305.001	1796	292.45	1246	208.685
gene1601	-		708	676	97.6603	644	88.5904	584	86.3962	548	83.0991	491	67.4168	619	87.4188
gene1602	-		738	5239	726.101	5627	742.599	5179	735.03	4206	611.874	4577	602.898	5068	686.638
gene1603	-		462	133	29.4452	130	27.4054	79	17.9102	84	19.5203	72	15.1499	65	14.0676
gene1604	-		519	545	107.407	543	101.898	460	92.8337	444	91.847	447	83.7259	412	79.3738
gene1605	-		978	5643	590.168	5812	578.79	5542	593.53	5051	554.482	5343	531.087	4727	483.275
gene1606	murI		795	1151	148.086	1050	128.634	1241	163.501	1019	137.612	1292	157.985	1341	168.659
gene1607	-		249	1107	454.729	1401	547.99	934	392.883	887	382.449	1199	468.101	805	323.254
gene176	-		246	90	37.4207	118	46.7176	71	30.23	87	37.9694	81	32.0088	86	34.9551
gene1608	-		1251	1292	105.636	1317	102.533	1355	113.448	1298	111.395	1446	112.365	1375	109.899
gene1609	-		690	2073	307.295	1992	281.173	1996	302.989	2344	364.718	2511	353.767	2455	355.754
gene1610	-		504	6711	1361.95	7239	1398.89	6601	1371.81	7097	1511.8	8211	1583.74	7556	1499.02
gene1611	-		741	213	29.4013	312	41.0082	259	36.6098	228	33.0344	295	38.7011	261	35.2184
gene1612	-		279	9	3.29946	15	5.23626	7	2.6279	21	8.08099	12	4.18116	17	6.09245
gene1613	-		933	3000	328.885	3007	313.896	3244	364.179	3565	410.23	4131	430.421	3729	399.63
gene1614	greA		483	3977	842.196	5322	1073.15	3988	864.815	3726	828.219	4774	960.848	3966	821.019
gene1615	-		1845	10853	601.67	13189	696.225	10983	623.505	9542	555.255	10962	577.581	11502	623.339
gene177	-		333	30	9.21471	42	12.284	48	15.0978	21	6.77056	24	7.00627	18	5.40475
gene1616	-		492	4915	1021.79	5447	1078.27	4348	925.635	4219	920.648	5154	1018.35	3801	772.468
gene1617	murC		1359	11260	847.469	11552	827.888	11968	922.396	10495	829.11	12007	858.884	12710	935.133
gene1618	-		591	1132	195.913	1298	213.905	1412	250.243	1236	224.533	1387	228.144	1570	265.619
gene1619	-		3093	17346	573.62	19655	618.909	20454	692.65	16381	568.604	19783	621.773	20564	664.776
gene1620	accA		771	3487	462.597	3145	397.283	3670	498.571	4559	634.84	4412	556.289	5357	694.728
gene1621	accD		867	18823	2220.62	14674	1648.4	24186	2921.87	25146	3113.86	25261	2832.38	37609	4337.31
gene1622	accC		1371	27160	2026.27	23338	1657.91	31084	2374.73	32690	2559.92	32308	2290.83	40016	2918.39
gene1623	fabZ		423	9264	2240.08	10287	2368.55	7624	1887.81	9025	2290.64	9214	2117.52	7720	1824.84
gene1624	bccP		462	2079	460.275	1754	369.761	2389	541.613	2432	565.159	2359	496.37	3100	670.914
gene1625	fabF		1233	30120	2498.6	28435	2246.07	32703	2778.05	30575	2662.27	28199	2223.26	34585	2804.61
gene1626	fabG		735	2374	330.368	2282	302.386	2744	391.032	2498	364.884	2507	331.579	3023	411.243
gene1627	fabD		921	1574	174.803	1628	172.159	1737	197.54	1603	186.863	1566	165.292	1807	196.176
gene1628	-		966	5611	594.112	6434	648.691	5339	578.893	5258	584.376	5753	578.944	4965	513.913
gene1629	acp		225	57	25.9118	101	43.7193	51	23.7412	35	16.7007	49	21.1706	66	29.3298
gene1630	fabH		978	779	81.4711	1034	102.971	783	83.8568	917	100.665	795	79.022	891	91.0933
gene1631	-		435	938	220.556	1067	238.896	882	212.371	895	220.894	975	217.889	1124	258.36
gene1632	-		792	5680	733.547	6491	798.216	6892	911.455	5393	731.062	6631	813.905	7536	951.4
gene1633	-		645	555	88.0112	651	98.3004	628	101.98	561	93.3797	673	101.432	573	88.8265
gene1634	akh		1359	6687	503.288	7441	533.268	5815	448.173	4624	365.298	5564	398.004	4741	348.817
gene178	-		792	1312	169.439	1699	208.931	1135	150.102	1068	144.776	1314	161.283	1074	135.59
gene179	-		129	2	1.58579	2	1.50999	4	3.24777	12	9.98713	3	2.26074	2	1.5502
gene1648	-		111	52	47.9165	54	47.3811	61	57.5602	112	108.329	106	92.833	87	78.3689
gene1649	-		171	483	288.906	472	268.831	571	349.748	1142	717	1296	736.764	1302	761.311
gene1650	-		294	56	19.4825	81	26.8332	55	19.5943	106	38.7086	99	32.7346	62	21.0859
gene1651	-		396	926	239.178	1118	274.967	777	205.514	1903	515.932	1780	436.963	1615	407.779
gene1652	-		300	0	0	0	0	0	0	0	0	0	0	0	0
gene1653	-		285	0	0	0	0	0	0	0	0	0	0	0	0
gene1654	-		645	207	32.8258	120	18.1199	188	30.5291	406	67.5796	327	49.2842	480	74.4096
gene180	-		156	5	3.27831	1	0.624323	3	2.01424	5	3.44108	6	3.73892	4	2.56379
gene1655	-		876	510	59.5485	527	58.5923	386	46.1528	1258	154.179	1188	131.835	870	99.3031
gene1656	-		1410	2010	145.808	2640	182.355	1330	98.7979	4920	374.624	4977	343.137	2550	180.829
gene1657	-		564	38	6.89143	48	8.28888	37	6.87128	148	28.1729	117	20.1663	66	11.7007
gene1658	-		750	896	122.194	1088	141.287	679	94.8252	2769	396.379	2779	360.203	1344	179.178
gene1659	-		2409	5608	238.109	7287	294.609	3767	163.785	19435	866.158	20363	821.721	9914	411.49
gene1660	-		975	3004	315.138	3373	336.935	2282	245.147	2091	230.249	2331	232.411	1719	176.286
gene1661	-		153	235	157.102	222	141.317	183	125.278	175	122.799	87	55.2774	133	86.9176
gene1662	-		192	6	3.19635	4	2.02905	5	2.72762	7	3.91423	1	0.506312	0	0
gene1663	-		306	4634	1548.96	4956	1577.41	3848	1317.13	3746	1314.3	3740	1188.15	3683	1203.45
gene181	-		1221	684	57.2988	520	41.4784	778	66.7389	693	60.935	634	50.477	1075	88.0319
gene1664	syv		2652	72744	2805.62	70694	2596.23	80423	3176.3	62666	2536.93	64006	2346.21	71709	2703.63
gene1665	-		309	28	9.26839	34	10.7165	1	0.338966	14	4.86428	16	5.03363	2	0.647171
gene1666	-		411	72	17.9182	156	36.9672	88	22.4262	62	16.1957	47	11.1167	57	13.8669
gene1667	-		936	811	88.6237	1299	135.166	641	71.7294	593	68.0187	752	78.1019	479	51.169
gene1668	-		258	1212	480.494	1701	642.124	1427	579.321	1121	466.482	1349	508.29	1293	501.102
gene1670	-		180	1540	875.091	1866	1009.66	1199	697.689	1284	765.847	1649	890.569	1178	654.365
gene1671	-		246	138	57.3784	217	85.9129	130	55.3507	130	56.7358	170	67.179	173	70.3167
gene1672	nrdI		462	370	81.9152	418	88.1187	382	86.6037	323	75.0602	407	85.6391	315	68.1736
gene1673	-		1380	1450	107.472	1614	113.909	1730	131.305	1231	95.7697	1612	113.555	1614	116.942
gene182	-		849	286	34.4559	273	31.3176	259	31.9527	297	37.5576	321	36.755	312	36.7447
gene1674	-		777	4781	629.365	6813	853.987	3780	509.549	3534	488.309	4977	622.682	3860	496.722
gene1675	-		534	1232	235.979	1388	253.152	1567	307.357	1168	234.829	1158	210.808	1491	279.18
gene1676	-		321	340	108.337	527	159.897	303	98.8673	225	75.2535	176	53.3	245	76.3148
gene1687	proS		1851	7793	430.629	7720	406.205	7130	403.458	7379	427.997	7755	407.282	6657	359.6
gene1688	-		1260	2825	229.326	2651	204.915	3207	266.59	2916	248.466	2761	213.018	3513	278.776
gene1689	cdsA		795	851	109.488	663	81.2233	1034	136.229	845	114.114	658	80.4597	1438	180.859
gene1690	uppS		750	844	115.103	815	105.835	870	121.499	766	109.652	752	97.4712	835	111.32
gene1691	-		384	911	242.657	1174	297.763	990	270.034	906	253.306	1009	255.435	1073	279.393
gene1692	-		348	5692	1672.98	7422	2077.19	5926	1783.6	5009	1545.33	5642	1576.06	5829	1674.8
gene1693	-		717	4223	602.43	4097	556.52	3560	520.051	4259	637.731	4143	561.714	4252	592.955
gene183	-		603	1814	307.698	1791	289.276	2058	357.473	2145	381.908	1920	309.531	2622	434.773
gene1694	-		735	2797	389.233	3017	399.781	2595	369.799	2842	415.132	2312	305.788	3004	408.658
gene1695	-		1101	1252	116.311	1014	89.6984	1669	158.776	1450	141.394	1582	139.681	2252	204.517
gene1696	-		174	191	112.277	194	108.589	260	156.509	192	118.468	148	82.686	219	125.847
gene1697	-		231	18	7.97013	23	9.69728	23	10.4287	26	12.084	21	8.83745	21	9.08981
gene1698	-		744	786	108.057	783	102.5	1015	142.892	824	118.906	871	113.806	1114	149.713
gene1699	-		354	140	40.451	235	64.6545	163	48.228	147	44.5824	183	50.2536	183	51.6887
gene1700	-		594	1902	327.513	2188	358.752	1831	322.862	1786	322.808	1739	284.599	1641	276.229
gene1701	nadD		633	447	72.2285	468	72.0072	456	75.453	479	81.2421	344	52.8292	516	81.5067
gene14	-		138	1	0.741183	2	1.41151	4	3.03596	0	0	6	4.22661	2	1.4491
gene184	-		2412	2991	126.836	2176	87.8649	2786	120.982	3440	153.119	3124	125.908	3878	160.76
gene1702	-		309	3460	1145.31	5891	1856.8	2986	1012.15	3257	1131.64	2818	886.548	2528	818.024
gene1703	-		1107	1612	148.944	2211	194.525	1951	184.597	2160	209.486	1507	132.338	2811	253.899
gene1704	-		528	241	46.6861	345	63.6384	411	81.5311	369	75.0312	334	61.4939	534	101.124
gene1705	-		618	42	6.95129	93	14.6564	52	8.81313	42	7.29642	47	7.39314	60	9.70756
gene1706	-		156	1	0.655662	1	0.624323	4	2.68566	2	1.37643	7	4.36207	4	2.56379
gene1707	-		597	11	1.88462	25	4.07849	20	3.5089	22	3.95638	32	5.21069	14	2.34477
gene1708	-		1170	1217	106.392	1082	90.069	998	89.3429	820	75.2449	973	80.8438	753	64.3512
gene1709	-		909	98	11.0272	76	8.14299	113	13.0206	141	16.6535	139	14.8652	195	21.4495
gene1710	-		96	4	4.26181	7	7.10167	3	3.27315	4	4.4734	2	2.02525	7	7.29078
gene1711	scnG		732	167	23.3351	159	21.1553	185	26.4713	177	25.9604	208	27.6231	224	30.5974
gene185	-		999	4487	459.405	3326	324.258	4211	441.504	4035	433.638	3920	381.452	4386	438.986
gene1712	scnE		753	84	11.4101	94	12.1581	82	11.406	96	13.6875	71	9.16607	63	8.36552
gene1713	scnF		909	256	28.8059	243	26.0361	229	26.3868	251	29.6455	254	27.1637	288	31.6793
gene1714	-		1251	22	1.79875	35	2.72486	26	2.17686	27	2.31716	30	2.33122	33	2.63757
gene1715	-		111	13	11.9791	11	9.6517	8	7.54888	6	5.80333	17	14.8883	14	12.6111
gene1716	scnK		1380	11561	856.882	11882	838.58	9786	742.748	9518	740.484	12388	872.653	7845	568.409
gene1717	scnR		699	4824	705.887	4553	634.387	4920	737.23	4360	669.667	4953	688.828	4269	610.656
gene1718	-		234	15	6.55662	23	9.57295	21	9.3998	21	9.63502	24	9.97046	19	8.11868
gene1719	-		207	18	8.8942	17	7.99857	31	15.6858	39	20.2276	24	11.2709	37	17.8722
gene1720	-		174	35	20.5742	40	22.3895	39	23.4764	35	21.5957	31	17.3194	30	17.2393
gene1721	gatB		1440	47154	3349.35	45699	3090.85	50364	3663.3	36495	2720.95	49202	3321.54	38746	2690.37
gene186	sloA		723	8797	1244.52	9624	1296.44	10471	1516.93	7602	1128.86	8366	1124.86	10911	1508.95
gene1722	-		1467	4314	300.784	4580	304.067	4314	308.01	3447	252.267	4459	295.479	3367	229.488
gene1723	-		303	406	137.053	534	171.646	319	110.272	271	96.0231	321	102.987	263	86.7882
gene1724	gatA		1752	2989	174.5	3035	168.717	2967	177.378	1888	115.696	2259	125.343	2203	125.727
gene1725	pncA		552	1806	334.644	1939	342.115	2038	386.705	1693	329.281	1658	291.988	1906	345.248
gene1726	-		786	1677	218.23	2378	294.661	1961	261.319	1856	253.516	1904	235.485	2021	257.094
gene1727	yfbQ		1218	2720	228.416	2968	237.329	2710	233.044	2132	187.927	2375	189.555	2593	212.864
gene1728	-		537	26	4.95227	16	2.90188	14	2.73067	22	4.39843	16	2.89645	18	3.35155
gene1729	-		450	27145	6169.96	21468	4646.36	24850	5784.01	26938	6426.91	30011	6483.17	25457	5656.43
gene187	sloB		840	1586	193.121	1225	142.033	1533	191.152	1469	187.755	1600	185.166	1465	174.384
gene1730	-		1401	2941	214.715	2612	181.58	2992	223.686	3220	246.756	3545	245.979	3891	277.697
gene1731	aspG		960	1883	200.624	1949	197.731	1835	200.207	1787	199.849	2131	215.79	2195	228.618
gene1732	-		165	148	91.745	171	100.936	121	76.8098	121	78.7319	63	37.1173	109	66.0526
gene1733	recG		2016	7198	365.196	7334	354.311	7219	375.061	7737	412.032	9007	434.319	7410	367.515
gene1734	alr		1116	19543	1791.15	19575	1708.33	16696	1566.98	17423	1676.13	20070	1748.25	15744	1410.58
gene1735	acpS		360	3751	1065.74	4401	1190.65	3742	1088.72	3088	920.925	2801	756.363	4272	1186.52
gene1736	aroG		1035	28104	2777.36	27968	2631.81	28459	2880.01	24994	2592.65	29399	2761.29	28895	2791.45
gene1737	aroH		1032	3478	344.711	3465	327.007	3839	389.631	3377	351.318	3955	372.552	4049	392.297
gene1738	secA		2520	68535	2781.74	70592	2728.28	64160	2666.73	57417	2446.18	67280	2595.4	62746	2489.62
gene1739	manA		951	5463	587.564	4302	440.579	5015	552.339	5640	636.719	5488	560.988	6244	656.493
gene188	sloC		921	11143	1237.51	14662	1550.48	8761	996.344	8647	1007.99	10592	1117.99	7646	830.084
gene1740	scrK		882	4550	527.652	3966	437.944	4158	493.777	4294	522.688	4692	517.141	4385	497.105
gene1741	scrA		1995	6064	310.9	4620	225.545	6906	362.576	7347	395.382	6941	338.22	8359	418.947
gene1742	scrB		1440	7729	548.992	7255	490.692	6877	500.209	6380	475.672	7077	477.756	7723	536.255
gene1743	scrR		963	7647	812.212	6308	637.969	6523	709.474	6982	778.4	8159	823.626	6152	638.76
gene1744	nusB		429	26388	6291.5	33887	7693.25	21509	5251.44	25179	6301.3	26709	6052.29	19563	4559.59
gene1745	-		390	2630	689.757	4911	1226.42	2436	654.226	2395	659.311	2495	621.907	1838	471.225
gene1746	efp		561	4814	877.704	6667	1157.45	4705	878.44	4347	831.909	5135	889.81	4272	761.405
gene1747	-		705	429	62.2405	472	65.2059	389	57.7931	380	57.8687	529	72.9434	476	67.5096
gene1748	comEB		453	4457	1006.35	5854	1258.6	3883	897.81	4214	998.724	4206	902.59	3059	675.194
gene189	-		138	0	0	0	0	0	0	0	0	0	0	0	0
gene1749	pepP		1065	10652	1023.03	12440	1137.64	10639	1046.32	11204	1129.46	9703	885.678	9364	879.142
gene1750	uvrA		2832	6618	239.022	7042	242.179	7256	268.361	7708	292.212	7577	260.09	6946	245.239
gene1751	-		945	2201	238.228	2395	246.836	2284	253.151	2311	262.553	2885	296.779	2503	264.836
gene1752	-		663	2405	371.028	2479	364.164	2790	440.764	2631	426.046	2788	408.789	2987	450.473
gene1753	-		402	66	16.7928	43	10.4178	82	21.365	52	13.8876	85	20.5548	107	26.6137
gene1754	-		687	2776	413.302	2894	410.276	2519	384.049	2791	436.167	3545	501.625	2190	318.739
gene1755	-		720	1364	193.77	1537	207.91	1352	196.68	1472	219.495	1511	204.01	1492	207.197
gene1756	rs18		240	629	268.068	945	383.49	744	324.696	918	410.658	841	340.647	834	347.458
gene1757	ssb		495	66394	13719.2	95892	18867.4	53766	11376.7	70077	15199.2	71137	13970.4	57695	11654.1
gene190	sloR		654	8943	1398.65	7346	1093.97	7170	1148.3	8417	1381.75	9159	1361.41	8262	1263.15
gene1758	rs6		291	123	43.2332	134	44.8483	116	41.7523	151	55.71	126	42.0918	204	70.0946
gene1759	-		246	27	11.2262	29	11.4815	28	11.9217	36	15.7115	21	8.29858	35	14.2259
gene1760	-		204	131	65.6819	144	68.749	108	55.4509	164	86.3104	203	96.7354	155	75.9712
gene1761	mutY		1146	2934	261.867	2900	246.461	2703	247.045	2395	224.373	2953	250.495	2432	212.191
gene1762	-		1050	107032	10426.3	118382	10980.7	115239	11495.4	85811	8774.11	86386	7997.86	102729	9782.53
gene1763	trxA		315	313	101.634	273	84.4085	478	158.94	300	102.249	395	121.901	790	250.763
gene1764	mutS2		2331	45766	2008.19	44991	1879.82	45113	2027.1	39690	1828.05	43913	1831.35	44577	1912.12
gene1765	-		546	1163	217.867	1280	228.324	1310	251.301	986	193.88	1329	236.62	991	181.48
gene1766	-		306	377	126.016	524	166.78	473	161.903	356	124.904	313	99.4357	538	175.796
gene1767	rnh3		912	938	105.199	987	105.404	1543	177.209	1028	121.017	1277	136.118	2086	228.7
gene1768	lepC		588	3606	627.268	4670	773.524	4089	728.375	3132	571.865	3646	602.78	4039	686.822
gene1769	-		2364	5126	221.787	5940	244.722	5564	246.522	4557	206.957	5242	215.56	4968	210.127
gene1770	-		471	200	43.4324	229	47.3531	157	34.9135	134	30.5445	176	36.3255	166	35.2399
gene1771	ptnA		993	959	98.7812	613	60.1236	1054	111.175	1130	122.174	1108	108.47	1940	195.344
gene1772	ptnC		819	4243	529.9	3677	437.264	4050	517.948	5740	752.449	6147	729.624	5439	664.022
gene1773	-		927	5659	624.403	3964	416.474	5420	612.399	7603	880.551	7705	808.002	8049	868.18
gene191	-		978	3135	327.871	2495	248.465	4330	463.729	2753	302.215	2333	231.897	5808	593.793
gene1774	-		2292	7256	323.808	8016	340.625	8340	381.124	5859	274.447	6392	271.108	7405	323.041
gene1775	-		354	5301	1531.65	7894	2171.84	5250	1553.36	3878	1176.13	5477	1504.04	5864	1656.3
gene1776	-		369	561	155.504	738	194.789	614	174.284	742	215.887	691	182.042	824	223.279
gene1777	-		1074	21	1.99995	68	6.1665	27	2.63314	16	1.59943	27	2.44388	51	4.74803
gene1778	sys		1281	7347	586.632	6500	494.195	9314	761.557	7482	627.073	8010	607.859	11295	881.626
gene1779	-		207	179	88.4479	169	79.5152	246	124.474	162	84.0222	229	107.544	298	143.944
gene1780	-		267	3111	1191.77	3278	1195.73	3306	1296.9	2772	1114.63	2959	1077.34	4753	1779.93
gene192	-		933	3386	371.202	2937	306.589	4288	481.38	2872	330.485	2975	309.974	4023	431.138
gene193	-		207	186	91.9068	220	103.511	168	85.0069	189	98.0259	191	89.698	212	102.403
gene1781	-		183	1	0.558925	0	0	0	0	0	0	0	0	0	0
gene1782	-		186	1	0.54991	0	0	0	0	0	0	0	0	2	1.07514
gene1783	-		837	2	0.244405	3	0.349084	5	0.625691	2	0.256539	1	0.116143	2	0.23892
gene1784	-		519	0	0	0	0	0	0	1	0.206863	0	0	0	0
gene1785	-		162	12862	8120.79	19297	11601.4	13703	8859.64	11815	7830.11	14006	8404.63	15181	9369.85
gene1786	-		483	316	66.9183	393	79.2464	352	76.3327	311	69.1294	343	69.0346	400	82.8057
gene1787	-		1512	850	57.5005	740	47.6666	1081	74.884	611	43.3849	720	46.2914	960	63.4844
gene1788	-		126	0	0	0	0	0	0	0	0	0	0	0	0
gene1789	-		1014	3991	402.577	6100	585.903	3639	375.889	2208	233.782	3019	289.431	2627	259.042
gene1790	-		144	16	11.3648	26	17.5851	14	10.1831	21	15.6569	16	10.8013	26	18.0534
gene1791	-		153	6	4.01111	10	6.36565	2	1.36916	6	4.21026	3	1.90612	9	5.88164
gene1792	-		1023	5682	568.107	7082	674.24	4774	488.79	5919	621.186	7682	729.992	4960	484.79
gene1793	-		189	164	88.7538	188	96.8791	134	74.2606	182	103.385	219	112.642	137	72.478
gene1794	-		213	426	204.567	319	145.863	336	165.225	376	189.521	328	149.697	425	199.506
gene1795	-		132	2	1.54975	4	2.95135	1	0.79349	1	0.813346	0	0	2	1.51497
gene1796	-		165	476	295.072	460	271.524	306	194.246	455	296.058	556	327.575	396	239.971
gene1797	-		405	10964	2768.97	12787	3075.02	8501	2198.52	10471	2775.76	13294	3190.95	7327	1808.92
gene1798	-		420	845	205.784	921	213.572	729	181.8	885	226.226	1071	247.89	718	170.932
gene1799	-		156	2665	1747.34	3041	1898.57	2205	1480.47	2633	1812.07	2929	1825.22	2835	1817.09
gene1800	-		402	825	209.91	840	203.511	840	218.861	860	229.679	1186	286.799	1113	276.832
gene1801	-		231	1868	827.122	2143	903.533	1929	874.652	1910	887.709	1939	815.991	2381	1030.61
gene1802	comC		141	15	10.8812	48	33.1555	15	11.1426	18	13.7057	31	21.3728	15	10.637
gene1803	comD		1326	18035	1391.16	21999	1615.82	14206	1122.13	15032	1217.09	16755	1228.35	12153	916.405
gene1804	comE		753	7251	984.935	9761	1262.51	7126	991.211	5371	765.79	7240	934.681	6661	884.488
gene1805	dedA		639	1795	287.322	1231	187.625	2257	369.952	1817	305.284	1955	297.417	2819	441.105
gene1806	sapR2		627	1720	280.586	1554	241.389	2006	335.103	1785	305.647	1605	248.844	2296	366.144
gene210	-		1164	34	2.98766	53	4.43462	32	2.87947	60	5.53411	49	4.09226	131	11.2529
gene1807	pgdA		1311	10888	849.474	10050	746.616	12116	967.992	10334	846.282	11178	828.86	11539	880.061
gene1808	dnaI		900	12122	1377.64	13028	1409.84	12212	1421.21	10893	1299.43	10614	1146.45	11756	1306.06
gene1809	dnaB		1170	7803	682.151	8734	727.045	8219	735.781	7353	674.727	8252	685.635	8246	704.701
gene1810	-		492	184	38.2523	278	55.0318	272	57.9054	246	53.6808	213	42.0857	360	73.1619
gene1811	gcrR		693	2299	339.321	3574	502.291	2716	410.499	2428	376.153	3010	422.234	2982	430.251
gene1812	-		537	535	101.902	648	117.526	478	93.2328	574	114.759	556	100.651	547	101.85
gene1813	psaR		576	1669	296.373	2368	400.399	1665	302.766	1643	306.242	1869	315.432	1713	297.36
gene1814	-		708	79	11.413	111	15.2695	127	18.7882	124	18.8035	104	14.2797	110	15.5348
gene1815	psaB		2613	629	24.6216	780	29.073	553	22.1667	557	22.8857	696	25.8934	526	20.1277
gene1816	htpX		900	5288	600.971	5492	594.322	5966	694.314	5631	671.726	5694	615.028	7450	827.678
gene1817	lemA		561	938	171.019	950	164.928	843	157.391	852	163.052	1266	219.377	1045	186.252
gene1818	gidB		714	1168	167.321	1045	142.545	1499	219.897	1141	171.568	1544	210.217	2133	298.703
gene1819	-		834	892	109.397	645	75.323	799	100.345	832	107.104	994	115.862	893	107.061
gene1820	-		1677	8882	541.73	7759	450.616	9427	588.784	8434	539.945	8878	514.638	9557	569.818
gene1821	-		546	470	88.0461	374	66.7134	619	118.744	490	96.3502	447	79.5856	857	156.941
gene1822	-		846	2523	305.036	2714	312.445	2338	289.461	2028	257.363	2100	241.306	2217	262.025
gene1823	cnhA		777	927	122.029	671	84.1076	1148	154.752	1034	142.873	958	119.857	1182	152.105
gene1824	-		690	1802	267.123	1211	170.934	2193	332.893	2054	319.595	1692	238.381	2721	394.3
gene1825	-		1065	1937	186.031	1759	160.861	1942	190.992	1934	194.965	1797	164.028	1548	145.335
gene211	-		186	0	0	0	0	0	0	0	0	2	1.04529	1	0.537569
gene1826	-		1374	996	74.1442	902	63.9372	1021	77.8313	1015	79.3101	985	69.6898	955	69.4967
gene1827	atmB		843	5099	618.675	9518	1099.64	4400	546.689	4600	585.841	5201	599.762	5509	653.42
gene1828	-		804	8563	1089.37	14863	1800.46	10166	1324.37	10105	1349.37	12536	1515.73	15233	1894.42
gene1829	syl		2502	3711	151.708	3805	148.116	4627	193.699	3980	170.783	4489	174.414	5629	224.953
gene1830	-		765	3089	413.011	5471	696.529	3291	450.59	2348	329.523	3321	422.014	3177	415.244
gene1831	-		690	320	47.4357	420	59.2835	347	52.6739	380	59.1267	424	59.736	355	51.4431
gene1832	nusG		537	566	107.807	655	118.796	573	111.762	622	124.356	529	95.7637	665	123.821
gene1833	secE		177	104	60.0987	115	63.2788	115	68.0518	90	54.5907	70	38.4454	123	69.4831
gene1834	pbp2a		2193	3613	168.513	3837	170.407	3583	171.129	3216	157.444	3636	161.178	4140	188.76
gene212	-		252	0	0	0	0	0	0	3	1.27812	2	0.771523	3	1.19033
gene1835	-		867	1137	134.136	1492	167.604	1308	158.017	925	114.544	1259	141.165	1309	150.962
gene1836	-		1704	3254	195.323	3974	227.139	2407	147.952	2952	185.993	3408	194.424	2132	125.102
gene1837	groEL		1629	114300	7176.79	123578	7388.46	107829	6933.14	87727	5781.78	106323	6344.91	95080	5836
gene1838	groES		288	16539	5873.83	18339	6201.79	17852	6492.47	12483	4653.46	16008	5403.36	18148	6300.63
gene1839	-		297	105	36.1608	169	55.4197	79	27.8603	312	112.784	268	87.7199	137	46.1224
gene1840	-		837	2263	276.544	1422	165.466	2068	258.786	6508	834.779	5197	603.597	5321	635.646
gene1841	-		852	3821	458.714	2569	293.669	3214	395.113	9027	1137.5	8069	920.661	9361	1098.58
gene213	-		261	0	0	0	0	0	0	0	0	0	0	1	0.383095
gene1842	-		495	2500	516.582	1757	345.701	2400	507.833	5444	1180.76	5964	1171.26	6289	1270.35
gene1843	-		432	12402	2936.38	16397	3696.7	12754	3092.27	22990	5713.53	23788	5352.96	27024	6254.8
gene1844	-		1308	1841	143.963	2092	155.771	1566	125.4	1705	139.948	1833	136.23	1349	103.122
gene1845	-		681	106	15.9208	158	22.5966	114	17.5337	119	18.7607	105	14.9886	123	18.0595
gene1846	-		1323	700	54.1182	817	60.1445	694	54.9433	608	49.3393	691	50.7736	715	54.0373
gene1847	-		963	255	27.0844	367	37.1171	268	29.149	192	21.4054	270	27.2557	314	32.6025
gene1848	ssb2		396	161	41.5849	172	42.3026	158	41.7905	171	46.3607	142	34.8588	159	40.1467
gene1849	-		357	34	9.74127	30	8.1844	27	7.92156	35	10.5257	39	10.6198	22	6.16172
gene1850	-		432	1128	267.073	1459	328.932	1150	278.823	1005	249.765	1053	236.954	1001	231.685
gene214	-		1098	131	12.2032	161	14.281	216	20.6047	370	36.1783	311	27.5345	716	65.2016
gene1851	-		627	4096	668.186	3207	498.156	4831	807.021	5390	922.934	4944	766.532	7362	1174.02
gene1852	-		330	952	295.072	1279	377.477	916	290.735	1090	354.619	908	267.48	860	260.575
gene1853	-		309	429	142.005	383	120.719	433	146.772	598	207.774	595	187.188	512	165.676
gene1854	pepA		1068	606	58.0372	547	49.8827	747	73.2596	526	52.8766	629	57.2531	873	81.7317
gene1855	proC		771	1619	214.782	1442	182.157	1764	239.64	1378	191.886	1791	225.819	1646	213.463
gene1856	-		663	2638	406.973	2728	400.742	1819	287.365	2585	418.597	3087	452.629	1582	238.583
gene1857	-		441	1624	376.662	1680	371.026	1239	294.271	1812	441.132	1825	402.294	1378	312.434
gene1858	-		246	3901	1621.98	4160	1646.99	3731	1588.57	4070	1776.27	4393	1735.98	4605	1871.72
gene1859	ackA		1200	4076	347.422	4042	328.057	4581	399.847	4246	379.881	4343	351.826	6087	507.189
gene1860	-		954	1763	189.02	1873	191.216	1521	166.992	1254	141.123	1604	163.446	1335	139.92
gene215	-		2427	59	2.48649	77	3.08997	55	2.3736	127	5.61802	125	5.0068	258	10.6291
gene1861	-		390	99	25.9642	155	38.708	79	21.2167	96	26.4275	50	12.4631	70	17.9465
gene1862	-		435	18	4.23241	22	4.92569	13	3.13018	16	3.94894	16	3.57561	6	1.37914
gene1863	-		294	60	20.8741	82	27.1644	39	13.8942	58	21.1802	22	7.27436	33	11.2231
gene1864	comYD		432	8	1.89414	10	2.2545	5	1.21228	12	2.98227	6	1.35017	2	0.462907
gene1865	comYC		315	39	12.6636	68	21.0248	52	17.2905	31	10.5658	21	6.4808	28	8.88781
gene1866	comYB		849	474	57.1052	437	50.1312	320	39.4782	350	44.2598	386	44.1977	303	35.6847
gene1867	comYA		942	1922	208.693	1912	197.684	1451	161.336	1302	148.392	1121	115.684	1281	135.971
gene1868	-		384	1409	375.305	1656	420.013	1412	385.14	1347	376.605	1417	358.722	1457	379.381
gene1869	rpoC		3657	64173	1794.87	65662	1748.73	61497	1761.34	74974	2201.08	75406	2004.47	65735	1797.29
gene216	-		2544	242	9.72978	353	13.5142	359	14.7806	541	22.8312	622	23.768	882	34.6656
gene1870	rpoB		3564	19271	553.059	18802	513.807	20321	597.204	28735	865.611	29476	803.99	27667	776.197
gene1871	pbp1b		2355	6768	293.951	6779	280.355	6644	295.498	6931	315.976	6979	288.086	7585	322.042
gene1872	tyrS		1269	1229	99.0593	1863	142.983	1311	108.207	1087	91.9639	1356	103.877	1522	119.922
gene1873	adcB		813	823	103.541	777	93.0817	574	73.9497	653	86.2327	704	84.1786	528	64.9368
gene1874	adcC		711	456	65.5994	512	70.1349	450	66.2915	425	64.1754	526	71.9177	405	56.9551
gene1875	-		447	78	17.8481	88	19.1738	89	20.8544	90	21.6164	61	13.2661	106	23.7108
gene1876	ipk		849	1370	165.051	1792	205.572	1536	189.495	1108	140.114	1451	166.142	1696	199.74
gene1877	comX1		483	57	12.0707	101	20.3661	79	17.1315	99	22.0058	114	22.9444	123	25.4628
gene1883	-		1287	1998	158.789	3652	276.367	1507	122.645	2077	173.264	2182	164.815	1990	154.604
gene217	-		381	67	17.9868	76	19.4278	76	20.8931	118	33.2511	113	28.8319	242	63.5094
gene36	mreC		810	411	51.8993	563	67.6951	684	88.4477	744	98.6137	679	81.49	968	119.492
gene1884	rl17		387	235	62.11	304	76.5062	267	72.2629	430	119.291	488	122.583	420	108.514
gene1885	rpoA		939	23275	2535.3	32007	3319.81	19028	2122.48	30509	3488.28	30766	3185.11	23635	2516.73
gene1886	rs11		384	193	51.408	243	61.6324	184	50.1882	229	64.0256	252	63.7953	209	54.4205
gene1887	rs13		366	3557	994.049	5968	1588.11	3320	950.106	4310	1264.29	4180	1110.23	4006	1094.4
gene1888	-		117	9	7.86795	16	13.3189	8	7.16175	8	7.34097	11	9.13958	7	5.98218
gene1889	if1		219	8143	3803.16	12529	5571.94	9309	4452.19	10317	5057.76	9974	4427.36	12556	5732.64
gene1890	adk		639	3743	599.134	5899	899.107	4509	739.085	3961	665.508	5225	794.886	4630	724.482
gene1891	secY		1305	5664	443.933	4694	350.321	6244	501.15	6939	570.868	6875	512.132	7385	565.832
gene1892	rl15		441	378	87.6714	348	76.8554	455	108.066	567	138.036	450	99.1959	731	165.74
gene1893	rl30		183	335	187.24	187	99.5232	515	294.762	503	295.098	431	228.953	1350	737.616
gene1894	rs5		495	10042	2075.01	13356	2627.88	9815	2076.83	11425	2477.99	10815	2123.93	9104	1838.97
gene218	-		228	0	0	11	4.69885	1	0.459389	13	6.1215	7	2.98458	22	9.64796
gene1895	rl18		357	2426	695.068	1925	525.166	3122	915.967	2842	854.683	2287	622.755	4668	1307.4
gene1896	rl6		537	9918	1889.1	9763	1770.69	10109	1971.74	11748	2348.76	11638	2106.8	11828	2202.34
gene1897	rs8		399	6230	1597.06	7546	1841.95	5857	1537.51	7409	1993.59	7923	1930.35	6741	1689.27
gene1898	rs14		186	4622	2541.69	3777	1977.73	4494	2530.67	5443	3141.77	5109	2670.19	4581	2462.61
gene1899	rl5		543	1237	233.01	1440	258.283	1479	285.288	1478	292.229	1279	228.976	2122	390.745
gene1900	rl24		306	4312	1441.33	4544	1446.27	4592	1571.79	5290	1856.02	5077	1612.89	5144	1680.84
gene1901	rl14		369	6021	1668.96	5746	1516.61	6774	1922.8	7392	2150.72	6993	1842.28	8111	2197.84
gene1902	rs17		261	466	182.621	502	187.326	500	200.653	558	229.532	384	143.024	485	185.801
gene1903	rl29		210	3	1.46119	9	4.17405	4	1.99506	4	2.04498	1	0.462914	2	0.952266
gene219	-		981	17	1.77249	37	3.67339	21	2.24215	62	6.78535	74	7.33301	156	15.9002
gene1904	rl16		414	1165	287.826	1235	290.536	1014	256.539	1471	381.471	1434	336.72	1227	296.341
gene1905	rs3		627	2705	441.27	2755	427.945	2590	432.661	3630	621.568	3365	521.72	3092	493.082
gene1906	rl22		345	1220	361.698	1450	409.339	1205	365.833	1822	566.994	1442	406.318	1382	400.531
gene1907	-		279	1725	632.397	1901	663.608	1746	655.474	2147	826.185	1792	624.386	2235	800.978
gene1910	-		624	1300	213.09	1457	227.41	1833	307.676	1904	327.591	1773	276.213	2570	411.809
gene1911	rl3		627	7187	1172.42	7281	1130.99	10667	1781.93	11032	1889.02	9650	1496.16	18519	2953.23
gene1912	-		111	738	680.046	991	869.53	852	803.955	951	919.828	1024	896.802	1135	1022.4
gene1913	-		687	1293	192.507	1704	241.572	1337	203.84	1634	255.355	1784	252.44	1607	233.887
gene1914	sacB		2388	52998	2270.02	68067	2776.11	60355	2647.25	61186	2750.85	75621	3078.42	75465	3159.79
gene1915	clpC		2442	12780	535.291	9714	387.424	12662	543.09	12423	546.173	12625	502.58	16327	668.51
gene220	-		474	28	6.04205	18	3.69852	23	5.08235	51	11.5516	35	7.1781	85	17.9303
gene1916	ctsR		465	3021	664.512	2819	590.44	3695	832.294	2430	561.051	2642	552.331	4171	896.881
gene1917	eftS		1047	2193	214.238	2265	210.696	2708	270.905	2481	254.407	2491	231.285	4547	434.236
gene1918	rs2		786	36605	4763.46	55239	6844.74	40076	5340.44	37737	5154.59	39353	4867.15	48792	6206.88
gene1919	-		1854	3913	215.876	5699	299.38	4060	229.367	3611	209.106	4081	213.982	4497	242.527
gene1921	-		957	1752	187.252	1728	175.859	2015	220.535	2228	249.95	2256	229.164	2899	302.889
gene1922	pepO		1896	14464	780.288	13542	695.63	16350	903.222	12205	691.112	14434	740.062	16951	893.932
gene1923	treA		1629	731	45.8988	555	33.1823	822	52.8526	933	61.4908	827	49.3519	1008	61.871
gene1924	pttB		1968	231	12.0058	205	10.1452	319	16.9778	327	17.8391	287	14.1767	429	21.7961
gene1925	treR		714	355	50.8552	431	58.7913	395	57.9448	321	48.2676	395	53.7797	302	42.2918
gene1926	dexA		2553	100168	4013.13	104759	3996.45	85654	3514.08	92868	3905.39	102645	3908.47	76859	3010.17
gene1927	-		447	1176	269.094	1045	227.689	1209	283.292	1284	308.395	1081	235.092	1165	260.595
gene1928	relA		2223	9281	427.032	8951	392.163	10173	479.319	8360	403.753	8106	354.476	9775	439.668
gene1929	-		822	1018	126.672	978	115.878	1326	168.961	1141	149.026	1446	171.008	1803	219.317
gene1930	ptsG		2190	4018	187.66	3771	167.705	4738	226.603	4072	199.624	4634	205.699	6279	286.678
gene1931	-		153	14	9.35926	2	1.27313	6	4.10748	20	14.0342	17	10.8013	15	9.80274
gene1932	-		744	1146	157.549	983	128.681	1235	173.864	1199	173.02	1286	168.03	1464	196.75
gene221	-		129	0	0	0	0	2	1.62389	0	0	0	0	0	0
gene1933	-		954	1114	119.438	988	100.865	1263	138.666	1132	127.394	1150	117.184	1402	146.942
gene1934	-		216	138	65.3477	166	74.8494	119	57.7043	111	55.172	73	32.854	107	49.531
gene1935	-		93	0	0	0	0	0	0	0	0	0	0	0	0
gene1936	-		471	1216	264.069	1225	253.308	1236	274.861	1411	321.629	1379	284.618	1249	265.148
gene1937	-		492	214	44.4891	228	45.134	365	77.7039	260	56.7358	307	60.6587	379	77.0232
gene1938	-		1284	30233	2408.36	27328	2072.89	32806	2676.11	28380	2372.99	33746	2554.92	36159	2815.78
gene1940	-		1860	259158	14251.4	235103	12310.6	206525	11629.9	281733	16262	271939	14212.8	251660	13528.5
gene1941	-		795	1564	201.222	2194	268.784	1529	201.445	1507	203.515	1917	234.409	1720	216.326
gene1942	-		1026	364	36.2877	254	24.1113	199	20.3152	653	68.3306	651	61.6813	614	59.8368
gene222	-		273	20	7.49328	65	23.1891	49	18.7996	65	25.5623	63	22.4335	143	52.3746
gene1943	-		876	3678	429.45	3265	363.005	4077	487.474	3073	376.624	3589	398.28	4510	514.778
gene1944	-		654	7195	1125.27	8069	1201.64	6457	1034.11	5711	937.527	7310	1086.57	6272	958.905
gene1945	hemZ		960	4876	519.514	3651	370.403	4729	515.957	6029	674.254	5668	573.956	6304	656.587
gene1946	-		2799	17344	633.798	14765	513.765	15644	585.41	18104	694.418	20947	727.509	18311	654.119
gene1947	-		1017	5513	554.462	6068	581.11	4319	444.813	5442	574.496	6158	588.625	4225	415.387
gene1948	-		2925	18599	650.382	19193	639.074	13468	482.272	17164	630.002	20726	688.826	12620	431.401
gene1949	csbB		960	4038	430.229	3232	327.894	3815	416.235	4052	453.156	3929	397.86	4512	469.943
gene1950	-		795	168	21.6146	195	23.8892	163	21.4751	174	23.498	185	22.6216	233	29.3046
gene223	-		402	1	0.254436	0	0	1	0.260549	4	1.06828	0	0	6	1.49236
gene1951	-		729	295	41.3904	393	52.5048	268	38.5055	275	40.4999	336	44.8055	232	31.8206
gene1952	-		606	122	20.5917	82	13.1788	98	16.9383	152	26.929	157	25.1853	158	26.0695
gene1953	-		558	2563	469.807	2427	423.613	1734	325.484	2531	486.976	2538	442.158	1915	343.148
gene1954	-		132	6	4.64924	8	5.90269	7	5.55443	7	5.69342	2	1.47291	10	7.57484
gene1955	nrdD		2205	31696	1470.28	32621	1440.86	24091	1144.36	31449	1531.25	36374	1603.62	25405	1152.01
gene1956	-		1572	2152	140.021	2133	132.152	2277	151.714	2278	155.579	2361	146.003	2543	161.749
gene1957	-		129	7	5.55026	0	0	2	1.62389	0	0	6	4.52149	3	2.3253
gene1958	-		300	81	27.6165	180	58.4366	92	32.1205	98	35.0715	95	30.7838	99	32.996
gene1959	-		420	4104	999.454	4338	1005.94	3968	989.55	5022	1283.74	5471	1266.3	4836	1151.29
gene1960	-		270	1655	626.959	2493	899.275	1653	641.246	1824	725.288	1733	623.957	1879	695.842
gene224	-		1233	283	23.4762	330	26.0666	332	28.2027	523	45.5395	521	41.0766	878	71.1998
gene1961	-		435	142	33.389	163	36.4949	75	18.0587	102	25.1745	132	29.4988	109	25.0544
gene1962	-		447	8	1.83057	2	0.435769	6	1.40591	1	0.240183	15	3.26215	7	1.56581
gene1963	-		426	2643	634.589	2964	677.646	2680	658.932	3103	782.026	3344	763.091	3318	778.779
gene1964	-		399	2007	514.493	3048	744.005	2086	547.591	2602	700.138	3034	739.201	3472	870.07
gene1965	recA		1152	18059	1603.42	20684	1748.7	17094	1554.2	15821	1474.45	15911	1342.66	17134	1487.15
gene1966	cinA		1257	19951	1623.43	24868	1926.81	18263	1521.78	15343	1310.46	17899	1384.25	17718	1409.38
gene1967	tagI		561	890	162.268	1238	214.927	1144	213.589	768	146.976	794	137.587	1017	181.261
gene1968	ruvA		594	812	139.822	924	151.502	983	173.333	798	144.233	907	148.436	1138	191.559
gene1969	hexB		1956	3223	168.537	4650	231.536	3594	192.453	2939	161.317	3799	188.808	3797	194.097
gene225	-		1725	70	4.15063	68	3.83932	90	5.46473	160	9.95818	191	10.7638	229	13.2738
gene1970	-		153	234	156.433	233	148.32	336	230.019	313	219.635	316	200.778	401	262.06
gene1971	-		2550	16515	662.435	13940	532.423	19309	793.113	15707	661.306	16889	643.848	23350	915.575
gene1972	-		348	103	30.2735	132	36.9427	131	39.4282	77	23.7553	88	24.5823	161	46.2588
gene1973	argR		438	671	156.694	719	159.878	834	199.438	511	125.255	604	134.055	823	187.877
gene1974	-		498	269	55.2494	365	71.3834	249	52.3703	215	46.3509	297	57.9758	273	54.8126
gene1975	-		225	322	146.379	438	189.594	320	148.964	351	167.484	334	144.306	408	181.311
gene1976	-		237	549	236.935	541	222.322	613	270.911	495	224.236	648	265.795	653	275.494
gene1977	argS		1692	14688	887.906	15041	865.786	14296	884.972	12324	781.989	16734	961.433	13130	775.911
gene1978	-		879	9864	1147.81	11536	1278.2	8063	960.778	8092	988.363	8412	930.315	5811	661.012
gene226	-		426	0	0	1	0.228625	0	0	2	0.504045	1	0.228197	4	0.938854
gene37	mreD		507	0	0	0	0	2	0.413178	2	0.423517	2	0.383479	1	0.197215
gene1979	-		939	451	49.1265	408	42.3183	513	57.2225	462	52.8233	506	52.3847	571	60.802
gene1980	aspS		1770	4365	252.241	4392	241.67	4064	240.489	3656	221.759	4152	228.036	3533	199.58
gene1981	hisS		1290	6758	535.838	7188	542.691	6595	535.476	5769	480.131	6324	476.565	6988	541.64
gene1982	-		1845	9699	537.694	9780	516.269	9171	520.638	9947	578.822	12789	673.845	8576	464.768
gene1983	-		183	15293	8547.64	18578	9887.39	16720	9569.75	14785	8674	17170	9120.92	16217	8860.68
gene1984	-		126	171	138.813	184	142.227	304	252.708	222	189.161	215	165.878	271	215.053
gene1985	-		258	23	9.11828	18	6.79496	19	7.71346	10	4.16131	12	4.52149	17	6.58835
gene1986	-		270	8	3.03062	18	6.49296	2	0.775857	9	3.57872	7	2.52031	12	4.44391
gene1987	-		1098	2717	253.1	3357	297.771	2783	265.477	1956	191.256	2758	244.181	2590	235.855
gene1988	-		1380	2462	182.479	2439	172.134	2115	160.526	2118	164.777	2711	190.972	1704	123.463
gene227	-		312	1	0.327831	3	0.936485	4	1.34283	18	6.19394	8	2.49261	38	12.178
gene1989	-		417	59	14.4717	42	9.80951	70	17.5824	37	9.5261	48	11.1899	85	20.3812
gene1990	gbpA		1698	15282	920.55	13147	754.09	16640	1026.43	17796	1125.21	19260	1102.65	21808	1284.18
gene1991	-		546	639	119.705	729	130.038	547	104.932	489	96.1536	579	103.087	534	97.7904
gene1992	-		375	134	36.5492	134	34.8023	148	41.3376	101	28.9161	131	33.9594	146	38.9286
gene1993	-		756	32	4.32945	64	8.24503	53	7.34293	35	4.97045	62	7.97241	62	8.20007
gene1994	opuCa		1152	9551	848.01	11455	968.449	12832	1166.69	8007	746.22	9546	805.543	14913	1294.37
gene1995	opuCb		633	450	72.7133	394	60.6215	652	107.885	533	90.4009	385	59.1257	960	151.64
gene1996	opuCc		936	8262	902.847	10223	1063.74	7192	804.802	6892	790.531	7608	790.159	6443	688.271
gene1997	opuCd		657	937	145.874	785	116.369	900	143.48	990	161.778	964	142.637	948	144.275
gene228	-		444	135	31.0997	225	49.3553	156	36.8008	252	60.935	205	44.8839	441	99.3123
gene1998	-		579	228	40.2774	257	43.2303	291	52.6417	249	46.1711	257	43.1493	315	54.3976
gene1999	-		288	67	23.7951	39	13.1888	51	18.5478	56	20.8759	65	21.9402	38	13.1928
gene2000	-		624	125	20.4894	183	28.5628	105	17.6246	139	23.9155	143	22.2777	124	19.8694
gene2001	-		198	0	0	0	0	0	0	0	0	0	0	0	0
gene2002	-		285	206	73.9311	303	103.546	205	75.3398	228	85.8893	287	97.8941	203	71.2195
gene2003	-		762	154	20.6714	165	21.0893	158	21.7179	223	31.4195	205	26.1528	245	32.1483
gene2004	-		1377	2933	217.863	3684	260.567	3576	272.006	3665	285.752	3675	259.444	4446	322.837
gene2005	-		1716	5463	325.626	4511	256.029	7123	434.771	7231	452.408	6910	391.454	10259	597.771
gene2006	-		342	229	68.488	311	88.5663	197	60.3331	218	68.4352	274	77.8833	248	72.5058
gene229	-		249	1	0.410776	3	1.17343	3	1.26194	7	3.0182	4	1.56164	9	3.61402
gene2007	-		945	159	17.2096	84	8.65728	196	21.724	114	12.9516	157	16.1506	243	25.7112
gene2008	-		165	67	41.5332	106	62.5685	86	54.5921	89	57.9102	64	37.7065	91	55.1448
gene2009	-		2505	1379	56.3069	1259	48.9499	1654	69.1581	1073	45.9877	1193	46.2969	1221	48.7366
gene2010	-		555	275	50.6809	370	64.9296	353	66.6188	293	56.6792	335	58.6775	346	62.3348
gene2011	-		612	5654	944.951	6558	1043.65	6323	1082.15	6530	1145.54	7127	1132.07	7231	1181.39
gene2012	-		177	56	32.3608	95	52.2738	83	49.1157	67	40.6397	26	14.2797	54	30.5048
gene2013	-		273	16	5.99463	7	2.49729	6	2.30199	13	5.11246	6	2.13653	19	6.95886
gene2014	dnaC		1365	6439	482.493	7601	542.341	7272	558.003	6994	550.101	8250	587.545	7791	570.7
gene2015	-		453	5753	1298.98	8247	1773.09	5158	1192.61	5375	1273.88	5392	1157.1	4993	1102.07
gene230	-		192	2	1.06545	2	1.01452	0	0	0	0	0	0	0	0
gene2016	rpiB		633	578	93.3961	660	101.549	669	110.697	711	120.591	856	131.459	663	104.727
gene2017	-		1122	5227	476.502	6304	547.214	4493	419.429	5265	503.796	5539	479.908	4493	400.397
gene2018	-		606	697	117.643	886	142.395	811	140.173	688	121.889	865	138.76	1108	182.816
gene2019	-		867	38806	4578.09	55936	6283.57	36938	4462.41	38237	4734.93	46001	5157.84	35415	4084.28
gene2020	-		795	2187	281.376	2452	300.391	2257	297.358	2052	277.115	2412	294.937	1869	235.066
gene2021	-		843	531	64.4276	544	62.85	557	69.2059	554	70.5556	608	70.1125	621	73.6566
gene231	-		309	5	1.65507	27	8.51019	12	4.0676	10	3.47449	10	3.14602	26	8.41322
gene2022	-		843	1781	216.093	2303	266.073	1696	210.724	1579	201.096	1968	226.943	1594	189.064
gene2023	pgsA		543	173	32.5875	181	32.4648	196	37.8069	184	36.3804	182	32.583	263	48.4288
gene2024	-		978	1775	185.637	2317	230.739	1843	197.379	1739	190.902	2166	215.298	2051	209.688
gene2025	-		1293	1551	122.693	2280	171.74	1520	123.129	1498	124.383	1986	149.314	1768	136.72
gene2026	-		1248	1833	150.229	2924	228.19	1834	153.922	1926	165.688	2497	194.502	1982	158.795
gene2027	-		366	601	167.957	682	181.484	681	194.886	728	213.55	887	235.593	802	219.099
gene2028	recF		1092	3469	324.928	3957	352.921	3141	301.273	3345	328.869	4461	397.127	2899	265.444
gene2029	guaB		1482	10446	720.952	10469	688.004	10608	749.723	9654	699.372	10552	692.16	10771	726.7
gene2030	-		1023	8128	812.667	10464	996.222	8429	863.01	6986	733.166	8751	831.575	8132	794.821
gene2031	-		1620	3217	203.114	3301	198.456	3298	213.231	3369	223.273	4305	258.332	3405	210.16
gene232	-		201	0	0	3	1.45365	9	4.68988	17	9.08034	2	0.967283	5	2.48726
gene2032	-		2574	2667	105.979	3028	114.573	2502	101.811	2641	110.156	3286	124.102	3119	121.159
gene2036	-		663	2036	314.101	2363	347.124	1922	303.637	1597	258.607	2069	303.366	1746	263.317
gene2037	-		480	2239	477.109	2725	552.916	2443	533.086	1903	425.644	2503	506.92	2631	548.059
gene2038	htrA		1209	23546	1992.03	33622	2708.51	20672	1790.9	20537	1823.73	23701	1905.72	22448	1856.52
gene2039	-		774	9428	1245.9	11558	1454.37	6969	943.072	6881	954.465	8368	1050.99	5662	731.436
gene1909	-		300	1955	666.546	2870	931.74	1623	566.647	2369	847.799	1944	629.933	2164	721.246
gene1908	-		840	4112	500.701	4294	497.871	4378	545.898	5049	645.32	3991	461.872	6329	753.361
gene233	-		315	151	49.0311	246	76.0604	184	61.1818	237	80.7769	265	81.7815	251	79.6729
gene234	-		528	81	15.6912	98	18.077	64	12.6958	78	15.8602	112	20.6207	181	34.2762
gene235	-		354	88	25.4264	85	23.3857	132	39.0558	83	25.1724	124	34.0516	193	54.5132
gene236	-		432	93	22.0193	97	21.8686	100	24.2455	84	20.8759	99	22.2777	93	21.5252
gene38	gbpB		1296	45578	3597.12	62931	4729.26	41840	3381.44	55677	4612.33	67779	5084.05	54649	4216.23
gene237	-		453	3100	699.952	4246	912.884	2646	611.796	3104	735.653	3522	755.807	3060	675.415
gene238	-		546	3948	739.587	5957	1062.6	4171	800.134	4065	799.314	5354	953.247	4060	743.5
gene239	-		195	390	204.567	648	323.649	535	287.365	365	200.959	530	264.217	568	291.247
gene240	-		102	0	0	9	8.59362	0	0	1	1.05257	0	0	2	1.96055
gene241	-		450	1776	403.678	3294	712.927	1842	428.738	1529	364.791	1767	381.719	1558	346.18
gene242	-		114	1	0.897222	1	0.854337	1	0.918778	1	0.941769	0	0	2	1.75417
gene243	-		549	2845	530.047	2414	428.252	4263	813.314	3270	639.477	3757	665.255	5913	1076.92
gene244	-		564	4726	857.076	6331	1093.27	5327	989.279	4310	820.441	5843	1007.11	5160	914.783
gene245	-		366	3682	1028.98	4158	1106.46	3524	1008.49	3337	978.869	3807	1011.16	3724	1017.36
gene246	-		1668	10156	622.775	8835	515.875	10489	658.648	9632	619.969	10097	588.459	10709	641.949
gene39	prs		969	3117	329.017	3058	307.36	4307	465.55	3009	333.386	3583	359.453	5058	521.918
gene247	ilvB		1704	18654	1119.71	15151	865.976	20143	1238.14	18923	1192.26	19537	1114.57	25328	1486.21
gene248	ilvH		483	3049	645.677	3421	689.827	2918	632.781	2983	663.064	3085	620.909	2441	505.322
gene249	ilvC		1023	11431	1142.91	11294	1075.24	12789	1309.41	11933	1252.34	13867	1317.73	14321	1399.73
gene250	ilvA		1251	2292	187.397	2343	182.41	2425	203.034	2468	211.805	2696	209.499	2981	238.261
gene251	-		888	3108	357.992	3853	422.591	2815	332.033	2920	353.036	3149	344.73	3255	366.51
gene252	-		642	1460	232.607	1377	208.897	1212	197.735	1279	213.887	1416	214.411	1207	187.983
gene253	-		1224	2297	191.948	2279	181.341	1561	133.579	1698	148.938	1959	155.587	1104	90.1852
gene254	-		720	355	50.4314	378	51.1321	450	65.4629	371	55.3211	381	51.4413	479	66.5197
gene255	-		591	2321	401.691	2581	425.338	2215	392.556	1861	338.071	2271	373.55	1841	311.468
gene40	-		1176	2223	193.347	1697	140.543	2635	234.687	2230	203.585	2459	203.269	3497	297.328
gene256	-		741	750	103.526	775	101.863	843	119.158	736	106.637	752	98.655	861	116.18
gene257	-		1554	994	65.4245	1071	67.1232	965	65.0416	987	68.1892	1123	70.2503	954	61.3825
gene258	-		1278	981	78.5133	839	63.9389	1023	83.8417	1058	88.88	1012	76.9785	1100	86.0616
gene259	bacA		846	127	15.3546	148	17.0383	168	20.7996	174	22.0815	161	18.5001	162	19.1466
gene260	mecA		723	2918	412.812	4099	552.171	2540	367.969	2730	405.391	3393	456.21	2880	398.292
gene261	rgpG		1161	672	59.2027	593	49.7458	807	72.8042	709	65.5637	853	71.4227	904	77.8545
gene262	-		771	1251	165.962	1325	167.377	1267	172.122	1220	169.885	1265	159.498	1211	157.05
gene263	-		1263	12245	991.654	11639	897.524	10799	895.562	9799	832.967	8912	685.948	8413	666.032
gene264	nifS		1230	11786	980.09	10641	842.58	10858	924.613	9633	840.825	8277	654.165	9195	747.471
gene41	recO		756	3580	484.358	3829	493.285	3172	439.467	3020	428.879	3920	504.062	3032	401.01
gene265	nifU		435	155	36.4458	121	27.0913	188	45.2672	146	36.034	130	29.0518	334	76.7723
gene266	-		1416	25328	1829.54	23217	1596.9	26164	1935.33	22399	1698.3	22727	1560.27	23656	1670.42
gene267	-		774	4341	573.659	4554	573.041	3961	536.018	3439	477.024	3505	440.217	3436	443.874
gene268	dacA		1245	2119	174.087	2719	212.703	2342	197.03	2166	186.783	2588	202.076	2531	203.269
gene269	oppA		1650	21864	1355.35	24080	1421.37	22204	1409.49	17986	1170.31	20729	1221.28	21955	1330.45
gene270	oppB		915	1061	118.604	978	104.1	1311	150.071	1045	122.615	1082	114.954	1417	154.845
gene271	oppC		1032	1252	124.088	1184	111.739	1156	117.326	1228	127.752	1374	129.428	1399	135.546
gene272	oppD		1053	4273	415.059	3943	364.697	4462	443.83	4646	473.696	5088	469.719	4906	465.851
gene273	oppF		927	2886	318.435	2584	271.486	2803	316.708	3281	379.993	3451	361.897	3176	342.569
gene42	plsX		999	31808	3256.68	29025	2829.7	36394	3815.75	31703	3407.09	31291	3044.9	54233	5428.07
gene274	-		603	359	60.895	419	67.6754	371	64.4424	363	64.6307	339	54.6515	414	68.6484
gene275	-		957	284	30.3537	393	39.9958	374	40.9331	310	34.7776	392	39.8193	386	40.3295
gene276	otcA		1020	56	5.61555	43	4.10584	61	6.2639	60	6.31539	64	6.09957	52	5.09742
gene277	-		1359	10	0.752637	2	0.143332	9	0.693647	14	1.10601	10	0.71532	6	0.441448
gene278	-		1110	38	3.50159	25	2.19357	41	3.8688	32	3.09511	23	2.0143	34	3.06269
gene279	arcC		951	10	1.07553	9	0.921714	23	2.53316	11	1.24183	12	1.22665	19	1.99766
gene280	-		2265	6146	277.542	7029	302.245	6942	321.02	5011	237.523	5263	225.884	5905	260.675
gene281	purA		1290	2890	229.146	2715	204.981	3399	275.979	2942	244.851	3051	229.918	3875	300.351
gene43	acpP		249	783	321.638	1122	438.862	825	347.032	699	301.389	603	235.417	964	387.102
gene282	sgaT		1458	955	66.9963	1001	66.8668	800	57.4709	1113	81.9572	1175	78.343	1230	84.3519
gene283	ptxB		282	466	169.021	645	222.764	520	193.139	427	162.565	416	143.405	563	199.621
gene284	ptxA		486	3276	689.465	2969	594.988	3216	693.099	2601	574.584	2827	565.469	3040	625.439
gene285	-		666	10914	1676.16	9842	1439.27	10654	1675.54	9054	1459.54	9009	1314.99	10278	1543.06
gene286	-		864	1179	139.574	1003	113.063	1400	169.719	1277	158.682	1234	138.842	1285	148.709
gene287	-		711	1790	257.507	1121	153.557	2511	369.907	2132	321.934	1890	258.411	3680	517.518
gene288	-		162	2	1.26276	0	0	0	0	0	0	0	0	0	0
gene289	-		252	278	112.836	445	171.986	343	142.564	283	120.569	359	138.488	482	191.247
gene290	-		132	232	179.771	356	262.67	199	157.904	297	241.564	228	167.912	261	197.703
gene291	-		210	0	0	1	0.463783	2	0.99753	5	2.55623	0	0	1	0.476133
gene44	-		582	241	42.3544	306	51.2074	222	39.9526	225	41.5058	252	42.0918	250	42.9501
gene292	-		279	24	8.79857	34	11.8689	37	13.8903	32	12.3139	38	13.2403	65	23.2947
gene293	-		219	25	11.6762	12	5.33668	35	16.7394	35	17.1583	25	11.0973	30	13.697
gene294	-		408	13	3.25903	21	5.01295	26	6.67465	16	4.21026	23	5.48008	22	5.3915
gene295	-		177	15	8.66808	15	8.25376	9	5.3258	7	4.24594	3	1.64766	9	5.08413
gene296	-		2283	12803	573.602	11449	488.422	14657	672.441	14963	703.659	15660	666.815	20708	906.942
gene297	-		903	22741	2575.89	30827	3324.89	15856	1839.17	19467	2314.52	23427	2522.02	14703	1628.04
gene298	-		1668	2926	179.425	2875	167.871	3028	190.141	2678	172.371	3348	195.123	2996	179.595
gene45	-		708	595	85.9584	540	74.2839	610	90.2426	608	92.1976	718	98.585	785	110.862
gene299	-		1092	1733	162.323	1585	141.365	1987	190.586	1887	185.523	1888	168.073	2528	231.474
gene300	tkt		1977	3748	193.909	2889	142.323	4037	213.879	4101	222.706	4212	207.11	5576	282.009
gene301	-		1002	333	33.9924	274	26.6328	391	40.8718	313	33.5371	406	39.3893	430	42.909
gene302	-		513	51	10.1685	48	9.11293	55	11.2295	66	13.8126	67	12.6963	89	17.3468
gene303	-		486	112	23.5715	131	26.2524	112	24.1378	83	18.3354	128	25.6031	153	31.4777
gene304	-		384	31	8.25725	34	8.62346	41	11.1832	38	10.6243	49	12.4046	56	14.5816
gene305	-		975	313	32.8356	396	39.5571	369	39.6403	309	34.0254	364	36.2925	415	42.559
gene306	polI		2637	34486	1337.63	32494	1200.13	33924	1347.45	26824	1092.1	30196	1113.16	31629	1199.29
gene307	-		429	6462	1540.69	5992	1360.34	5432	1326.23	5438	1360.92	6056	1372.3	5146	1199.39
gene308	-		219	8177	3819.04	18518	8235.39	16471	7877.55	7909	3877.28	10417	4624	17141	7825.99
gene46	purL		3726	26100	716.477	17186	449.227	20078	564.408	25989	748.852	27962	729.533	28908	775.752
gene309	tgt		1143	4362	390.341	4418	376.455	4492	411.632	3819	358.718	4529	385.191	4524	395.753
gene310	-		564	1417	256.978	1814	313.251	1284	238.452	1220	232.236	1403	241.823	1175	208.308
gene311	-		1014	736	74.2411	766	73.5741	871	89.9695	805	85.2329	883	84.653	1077	106.2
gene312	-		777	3121	410.845	2924	366.514	3848	518.716	2940	406.233	3690	461.663	3811	490.417
gene313	-		471	2447	531.396	2388	493.796	2968	660.022	2534	577.61	2273	469.135	4197	890.975
gene314	-		564	2165	392.63	2059	355.559	2373	440.691	2107	401.083	2271	391.433	2545	451.187
gene315	pgi		1350	6948	526.418	8946	645.4	8057	625.108	6636	527.742	7000	504.062	9213	682.362
gene316	-		801	232	29.6251	265	32.2216	269	35.1751	252	33.7767	194	23.5445	344	42.9411
gene317	-		1866	467	25.5982	427	22.2869	356	19.9827	422	24.2801	352	18.3379	345	18.4865
gene47	-		621	12516	2061.48	13102	2054.85	5852	987.025	9496	1641.72	12131	1899	6384	1027.89
gene318	-		489	53	11.0859	72	14.3403	46	9.8529	37	8.12348	46	9.14468	66	13.4953
gene319	-		543	26	4.89754	34	6.09836	59	11.3807	57	11.27	45	8.05624	25	4.60349
gene320	-		1011	148	14.9732	154	14.8355	182	18.8554	166	17.6281	202	19.4232	195	19.2855
gene321	-		366	109	30.4614	122	32.4648	117	33.4827	125	36.6672	103	27.3575	117	31.9633
gene322	-		162	43	27.1493	61	36.6732	34	21.9826	63	41.7518	39	23.4029	53	32.7121
gene323	-		699	285	41.7035	268	37.3415	345	51.696	285	43.7741	287	39.9139	590	84.3961
gene324	-		1131	4036	365	3172	273.152	5145	476.473	5163	490.105	5426	466.377	7086	626.449
gene48	purF		1440	10626	754.766	6500	439.627	8972	652.592	12525	933.823	12252	827.112	15653	1086.88
gene325	-		537	736	140.187	907	164.5	934	182.175	768	153.545	1054	190.803	1140	212.265
gene326	-		672	546	83.1052	603	87.3941	712	110.975	633	101.131	607	87.809	1107	164.712
gene327	-		921	994	110.39	858	90.7322	1396	158.76	971	113.19	1241	130.988	1887	204.861
gene328	gpsA		1020	1288	129.158	1159	110.667	1857	190.69	1206	126.939	1271	121.134	2364	231.737
gene329	-		447	2239	512.332	2050	446.663	2397	561.663	2375	570.434	1929	419.512	2774	620.507
gene330	-		471	107	23.2363	145	29.9834	145	32.245	112	25.5297	116	23.9418	131	27.8098
gene331	-		1401	4708	343.719	5056	351.482	4706	351.827	4389	336.339	4580	317.795	4979	355.346
gene332	-		501	6246	1275.17	5663	1100.89	6548	1368.95	5910	1266.48	5910	1146.75	7383	1473.47
gene333	-		714	2854	408.847	3457	471.558	3199	469.279	3005	451.851	2984	406.275	3961	554.695
gene49	-		282	3961	1436.68	2599	897.617	2489	924.466	4420	1682.76	4667	1608.82	3482	1234.6
gene334	gltX		1458	1248	87.5512	1089	72.7452	1323	95.0424	1169	86.0808	1096	73.0756	1474	101.085
gene335	-		525	1063	207.099	1353	250.999	884	176.363	818	167.28	622	115.173	637	121.319
gene336	-		549	403	75.0823	275	48.7859	549	104.741	426	83.308	317	56.1315	813	148.07
gene337	-		1236	2280	188.678	2114	166.579	2329	197.363	1888	163.996	2237	175.941	2446	197.872
gene338	-		1191	1134	97.3882	1046	85.537	1008	88.647	939	84.6453	1051	85.7848	1065	89.4098
gene339	-		1383	541	40.011	548	38.5916	695	52.6354	639	49.6053	672	47.2353	881	63.6944
gene340	rnpA		360	563	159.96	808	218.596	613	178.35	513	152.99	602	162.56	689	191.366
gene341	-		816	378	47.3812	386	46.0714	462	59.3017	345	45.3919	355	42.292	634	77.6867
gene342	-		969	2407	254.072	3132	314.798	2033	219.75	1705	188.908	2193	220.006	1799	185.633
gene343	-		603	7242	1228.42	10053	1623.72	6233	1082.67	5520	982.813	6843	1103.19	4515	748.666
gene50	purM		1023	2014	201.367	1344	127.955	1900	194.533	2644	277.482	2600	247.068	3427	334.955
gene344	-		135	349	264.421	500	360.72	405	314.222	355	282.321	356	256.351	424	314.036
gene345	-		900	1557	176.95	1288	139.382	1824	212.274	1486	177.266	1595	172.281	2581	286.743
gene346	-		636	3375	542.777	3493	534.904	3430	564.875	2967	500.852	3205	489.881	3632	571
gene347	-		522	878	172.04	923	172.213	963	193.228	923	189.837	1015	189.023	973	186.376
gene348	-		258	693	274.738	722	272.553	979	397.446	777	323.333	1103	415.6	1143	442.97
gene349	-		315	117	37.9909	111	34.3199	170	56.5267	117	39.8772	163	50.3033	149	47.2959
gene350	-		618	468	77.4573	473	74.543	564	95.5886	501	87.0359	458	72.0438	681	110.181
gene351	-		447	1043	238.661	1234	268.87	1178	276.028	992	238.261	1147	249.445	1147	256.569
gene352	-		876	29452	3438.87	23988	2667.01	29315	3505.11	32468	3979.25	33626	3731.56	29771	3398.1
gene51	purN		555	2722	501.649	2202	386.419	2217	418.396	3253	629.275	2703	473.448	2909	524.081
gene353	-		405	361	91.1711	209	50.2603	456	117.93	482	127.774	342	82.0901	627	154.796
gene356	-		873	4182	489.976	4143	462.205	4963	595.45	3596	442.237	3780	420.918	6178	707.589
gene357	-		660	738	114.371	720	106.248	847	134.417	712	115.82	807	118.864	931	141.044
gene358	-		633	3752	606.267	3721	572.519	3505	579.962	3247	550.716	4078	626.272	3344	528.214
gene359	-		1275	20831	1671.11	22032	1682.98	18563	1524.94	17509	1474.35	21295	1623.63	17002	1333.33
gene360	-		969	2337	246.683	2192	220.318	2340	252.934	2350	260.371	2383	239.067	2520	260.03
gene361	purR		816	16561	2075.88	14071	1679.46	16285	2090.32	15015	1975.53	15041	1791.87	20656	2531.07
gene362	-		414	11387	2813.29	10191	2397.45	14055	3555.87	12970	3363.48	12552	2947.35	19222	4642.43
gene363	-		471	10022	2176.4	9226	1907.77	8832	1964.05	10536	2401.62	11967	2469.93	9357	1986.38
gene364	-		2082	39116	1921.67	31649	1480.52	35191	1770.38	40711	2099.33	40069	1870.89	40690	1954.13
gene52	-		708	2362	341.233	1633	224.64	1374	203.268	2301	348.925	2859	392.555	1652	233.305
gene365	gapC		1014	28844	2909.53	28272	2715.52	29034	2999.05	34155	3616.31	38005	3643.53	32674	3221.9
gene366	pgk		1197	28356	2423.01	23148	1883.45	25125	2198.5	30348	2721.98	33205	2696.68	28086	2346.08
gene367	-		519	296	58.335	304	57.048	283	57.1129	379	78.4009	406	76.0463	411	79.1812
gene368	glnR		372	2245	617.274	2033	532.266	1808	509.062	3257	939.992	3448	901.04	2864	769.799
gene369	glnA		1347	34114	2590.42	33323	2409.41	23965	1863.48	40848	3255.76	48651	3511.1	29545	2193.13
gene370	gltA		4518	33864	766.649	27169	585.681	25619	593.924	50730	1205.5	47158	1014.68	41026	907.947
gene371	gltB		1437	8517	606.226	5540	375.48	8115	591.489	14886	1112.17	13641	922.803	16636	1157.55
gene372	-		636	2213	355.901	1956	299.534	2715	447.124	3420	577.322	3171	484.684	4602	723.497
gene373	-		1683	14673	891.743	14448	836.099	18581	1156.38	13932	888.748	16829	972.062	18277	1085.85
gene374	-		231	131	58.0048	244	102.875	181	82.0695	147	68.3211	98	41.2414	151	65.3601
gene53	purH		1563	10480	685.815	5735	357.362	11063	741.36	14786	1015.64	15929	990.716	20502	1311.55
gene375	-		846	49	5.92421	57	6.56203	79	9.78075	43	5.45692	41	4.71122	64	7.5641
gene376	-		714	12	1.71905	19	2.59173	10	1.46696	12	1.8044	8	1.08921	12	1.68047
gene377	-		1164	129	11.3355	228	19.0773	202	18.1766	117	10.7915	162	13.5295	164	14.0876
gene378	-		744	174	23.9211	303	39.6647	196	27.593	138	19.9139	196	25.6096	134	18.0086
gene379	-		711	31	4.45961	34	4.6574	54	7.95499	27	4.07703	49	6.69956	20	2.8126
gene380	-		909	139	15.6407	117	12.5359	124	14.2881	99	11.6929	117	12.5124	145	15.9497
gene381	-		1239	1640	135.387	2921	229.612	1515	128.073	1354	117.327	1525	119.652	1186	95.7108
gene382	-		240	2242	955.497	4269	1732.4	2513	1096.72	2246	1004.73	2473	1001.69	2477	1031.96
gene383	-		138	0	0	0	0	0	0	0	0	0	0	0	0
gene384	-		903	13043	1477.39	13173	1420.79	14239	1651.61	10744	1277.4	11499	1237.92	12260	1357.53
gene385	-		855	208	24.883	210	23.9214	236	28.9109	230	28.8809	263	29.9026	306	35.7851
gene386	-		1047	143	13.9699	216	20.0928	126	12.6049	119	12.2025	171	15.877	188	17.9539
gene387	-		459	26	5.79383	20	4.24376	30	6.84579	26	6.08149	20	4.23581	53	11.5454
gene388	-		687	1556	231.664	1318	186.85	2142	326.571	1639	256.137	1611	227.96	2366	344.354
gene389	-		435	240	56.4322	314	70.3031	230	55.3801	205	50.5957	164	36.65	222	51.0283
gene390	-		1011	465	47.0443	483	46.5297	764	79.1512	566	60.1055	542	52.1156	872	86.2408
gene391	-		699	1691	247.441	1624	226.278	2142	320.965	1773	272.321	1788	248.662	2324	332.435
gene392	-		324	7	2.20982	2	0.6012	6	1.93964	0	0	0	0	8	2.46884
gene54	-		543	367	69.1307	400	71.7454	465	89.695	255	50.4185	398	71.253	329	60.582
gene55	-		510	323	64.7794	332	63.4018	413	84.8194	405	85.2578	434	82.7255	473	92.7339
gene393	-		159	0	0	1	0.612543	0	0	0	0	0	0	0	0
gene394	-		492	185	38.4602	204	40.383	274	58.3312	327	71.3562	320	63.2273	498	101.207
gene395	-		1173	2023	176.402	1679	139.408	2434	217.339	2110	193.123	2053	170.142	3331	283.938
gene396	-		516	451	89.3988	756	142.694	660	133.971	479	99.6633	570	107.385	673	130.411
gene397	-		300	545	185.815	809	262.64	480	167.585	357	127.76	505	163.64	429	142.983
gene398	pepX		2277	6249	280.706	5977	255.655	5976	274.892	5204	245.371	6709	286.427	6150	270.06
gene399	glpF		870	919	108.044	894	100.081	1061	127.735	1228	151.54	1321	147.606	1325	152.28
gene400	-		759	707	95.2758	951	122.032	784	108.191	605	85.5781	698	89.3991	881	116.06
gene56	-		162	5	3.15689	4	2.4048	2	1.29309	4	2.65091	1	0.600074	1	0.617209
gene401	-		951	453	48.7217	439	44.9591	460	50.6632	461	52.0439	637	65.1146	484	50.8876
gene402	-		441	158	36.6457	122	26.9436	149	35.3886	147	35.7872	166	36.5923	182	41.2648
gene403	pfl		2328	62377	2740.6	70370	2944.01	66401	2987.49	79032	3644.76	81721	3412.48	84190	3615.97
gene404	-		1113	2742	251.986	2744	240.117	2676	251.829	2312	223.019	2800	244.558	2596	233.215
gene405	-		324	3609	1139.32	2515	756.009	3415	1103.98	2941	974.539	3394	1018.33	3074	948.651
gene406	-		408	246	61.6708	223	53.2327	262	67.2599	202	53.1546	229	54.5626	254	62.2474
gene407	-		813	389	48.94	353	42.2881	493	63.5143	304	40.1451	368	44.0025	547	67.2735
gene408	-		600	121	20.6271	146	23.6993	95	16.5839	78	13.957	114	18.4703	117	19.4976
gene409	-		1431	3998	285.764	3392	230.861	4125	301.925	4225	316.983	4316	293.198	5332	372.561
gene410	-		444	536	123.477	734	161.008	641	151.213	618	149.436	596	130.492	844	190.067
gene57	-		102	0	0	0	0	0	0	0	0	0	0	0	0
gene411	brpA		1221	5637	472.212	5785	461.447	5617	481.841	5167	454.331	5755	458.194	5534	453.18
gene412	-		294	733	255.012	1367	452.851	679	241.901	526	192.082	550	181.859	557	189.433
gene413	-		420	558	135.891	720	166.962	701	174.817	459	117.331	674	156.002	702	167.123
gene414	-		726	580	81.7139	536	71.9055	583	84.1099	559	82.6655	593	79.4031	636	87.5927
gene415	-		1035	2598	256.746	3426	322.39	2527	255.729	2252	233.602	2316	217.529	2308	222.968
gene416	-		783	8032	1049.22	8966	1115.25	8351	1117.1	5952	816.113	6633	823.508	7793	995.154
gene417	-		636	224	36.0243	196	30.0146	318	52.3703	219	36.9689	261	39.8936	285	44.8059
gene419	-		492	10255	2131.94	12107	2396.65	11276	2400.52	8225	1794.82	9841	1944.44	9742	1979.84
gene420	nusA		1194	2489	213.219	2198	179.291	2229	195.533	2130	191.525	2248	183.025	2320	194.281
gene421	-		297	64	22.0409	80	26.2342	65	22.923	27	9.76015	27	8.83745	45	15.1497
gene58	-		879	115	13.3818	148	16.3986	193	22.9977	157	19.1761	118	13.0501	169	19.2241
gene422	-		303	854	288.284	1292	415.292	704	243.358	632	223.936	617	197.953	676	223.075
gene423	-		2751	54673	2032.76	54490	1929.12	47607	1812.57	43845	1711.11	50945	1800.24	43875	1594.68
gene424	-		351	1921	559.79	2074	575.487	1598	476.853	1507	460.952	1939	537.02	1524	434.136
gene425	-		231	292	129.293	238	100.346	253	114.716	287	133.389	290	122.041	341	147.601
gene426	copY		444	4491	1034.58	4601	1009.26	4916	1159.7	1738	420.258	1936	423.879	2420	544.979
gene427	copA		2229	220408	10114	178273	7789.5	194578	9143.21	102565	4940.13	105392	4596.39	107735	4832.75
gene428	copZ		204	2014	1009.8	2521	1203.58	1847	948.314	812	427.342	729	347.39	874	428.38
gene429	-		828	4455	550.329	3918	460.859	3878	490.561	2613	338.812	3002	352.452	2815	339.935
gene430	-		492	97	20.1656	74	14.6488	126	26.8238	116	25.3129	128	25.2909	177	35.9713
gene59	-		1380	1324	98.1327	1698	119.837	1092	82.8817	922	71.73	1366	96.2257	1044	75.643
gene431	-		870	627	73.7145	522	58.4366	560	67.4193	581	71.6979	640	71.5122	663	76.1977
gene432	-		858	407	48.519	338	38.3675	403	49.1964	416	52.0541	468	53.0247	410	47.7798
gene433	-		459	511	113.871	510	108.216	422	96.2975	536	125.372	516	109.284	400	87.1354
gene434	-		399	63	16.15	58	14.1576	84	22.0507	80	21.5261	75	18.2729	172	43.1026
gene435	-		1179	4404	382.066	3560	294.083	4133	367.17	3628	330.372	4430	365.266	4980	422.341
gene436	-		837	61	7.45434	69	8.02893	75	9.38536	81	10.3898	102	11.8466	78	9.31787
gene438	-		4302	14957	355.614	14754	334.021	16997	413.825	19482	486.197	20754	468.976	20430	474.838
gene439	-		612	102	17.0472	145	23.0755	132	22.5911	131	22.981	164	26.0503	123	20.0956
gene60	-		612	832	139.052	1138	181.103	640	109.533	615	107.888	769	122.15	638	104.236
gene440	-		417	588	144.227	682	159.288	553	138.901	536	138	503	117.26	478	114.614
gene441	-		459	82	18.2728	49	10.3972	70	15.9735	72	16.841	56	11.8603	103	22.4374
gene442	-		411	145	36.0854	105	24.8818	194	49.4396	204	53.289	166	39.2632	253	61.5497
gene443	-		108	23	21.7826	23	20.7414	44	42.6721	35	34.7931	40	36.0044	40	37.0326
gene444	sygA		918	289	32.2003	298	31.616	422	48.1487	375	43.8569	355	37.5929	442	48.1423
gene445	sygB		2040	2926	146.706	2998	143.132	2460	126.305	2701	142.149	3291	156.826	2677	131.21
gene446	-		255	295	118.328	431	164.616	245	100.633	261	109.888	285	108.649	227	89.0088
gene447	-		381	2909	780.951	3520	899.812	2526	694.422	2658	748.996	3179	811.12	2658	697.553
gene448	proB		810	1236	156.077	1503	180.721	1239	160.214	1047	138.775	1192	143.058	1209	149.241
gene61	-		1602	2702	172.515	4203	255.524	2257	147.565	1607	107.697	2214	134.349	1717	107.166
gene449	proA		1251	2703	221.001	2432	189.339	3119	261.14	2594	222.619	2972	230.946	3482	278.304
gene450	-		105	0	0	0	0	0	0	0	0	0	0	0	0
gene451	-		951	2802	301.365	3056	312.973	3139	345.721	3117	351.889	3257	332.933	3608	379.344
gene452	ftsL		324	118	37.2513	167	50.2002	145	46.8747	114	37.7754	107	32.1039	147	45.3649
gene453	pbp2x		2250	6545	297.531	6746	292.01	6702	311.987	6854	327.048	7046	304.425	7028	312.318
gene454	mraY		1020	6854	687.304	6601	630.295	8217	843.778	7695	809.949	7511	715.842	9803	960.962
gene455	-		168	0	0	0	0	2	1.24691	0	0	0	0	1	0.595166
gene456	-		1344	30760	2340.95	33202	2406.02	27259	2124.35	23394	1868.76	29675	2146.4	22887	1702.7
gene457	-		822	9888	1230.39	12558	1487.93	9957	1268.74	8345	1089.94	9708	1148.09	10438	1269.68
gene62	-		636	796	128.015	1124	172.125	696	114.622	530	89.4681	708	108.217	611	96.0576
gene458	-		804	1603	203.931	1395	168.987	1570	204.531	1599	213.522	1597	193.094	1703	211.79
gene459	-		744	3454	474.848	2581	337.87	3951	556.224	4055	585.15	3884	507.488	4684	629.494
gene460	-		225	0	0	8	3.46291	7	3.2586	5	2.38581	2	0.864106	2	0.888781
gene461	trxB		915	2318	259.118	2197	233.853	2300	263.282	2121	248.868	2579	274	2632	287.615
gene462	-		1461	6690	468.361	6489	432.575	7349	526.858	6537	480.372	7023	467.296	7380	505.072
gene463	nadE		825	5072	628.825	4694	554.145	5648	717.061	5399	702.601	5668	667.876	5793	702.097
gene464	pepC		1335	51857	3973.11	56143	4095.89	51845	4067.62	49384	3971.5	59137	4306.23	44414	3326.49
gene465	pbp1a		2124	15096	726.963	14511	665.391	15136	746.4	15969	807.184	18446	844.243	16604	781.638
gene466	recU		594	1450	249.682	1019	167.079	1654	291.652	1681	303.83	1903	311.438	2422	407.695
gene63	-		609	712	119.582	1147	183.434	634	109.04	439	77.3921	546	87.1555	427	70.1065
gene467	-		522	297	58.1957	425	79.2962	340	68.2219	282	58	377	70.2086	331	63.4023
gene468	-		339	2624	791.715	2746	788.923	3438	1062.24	2254	713.844	3035	870.319	4005	1181.27
gene469	-		1155	5403	478.473	6262	528.038	5952	539.754	4185	389.012	4410	371.173	6341	548.938
gene470	-		1566	24314	1588.07	27974	1739.79	21831	1460.15	19579	1342.3	25265	1568.37	20793	1327.62
gene471	luxS		483	2982	631.488	3129	630.946	3510	761.159	2455	545.7	3604	725.366	4567	945.434
gene472	-		1608	7300	464.346	8553	518.044	7452	485.403	8018	535.339	9494	573.962	9240	574.557
gene473	kguA		633	5959	962.885	6712	1032.72	6291	1040.95	5311	900.786	5141	789.521	6546	1034
gene474	rpoZ		318	999	321.324	1163	356.194	903	297.424	838	282.922	788	240.89	1018	320.087
gene64	purD		1260	2411	195.718	1456	112.545	3254	270.497	3039	258.946	2408	185.783	5429	430.821
gene475	priA		2385	37061	1589.4	31787	1298.06	34658	1522.06	29956	1348.48	32509	1325.06	38267	1604.29
gene476	-		948	4424	477.322	2796	287.252	4373	483.155	4417	500.228	4010	411.202	6739	710.779
gene477	sunL		1314	126302	9831.5	122571	9085.03	97674	7785.72	110027	8989.87	128052	9473.5	104309	7937.32
gene478	-		744	52330	7194.2	50784	6647.95	42489	5981.62	49185	7097.56	54850	7166.77	43857	5894.04
gene479	pknB		1851	84805	4686.19	78255	4117.56	73872	4180.12	88572	5137.35	103914	5457.42	81882	4423.13
gene480	-		819	330	41.2131	283	33.654	272	34.7857	328	42.9971	364	43.2053	310	37.8465
gene481	-		1005	1834	186.654	2424	234.909	1502	156.538	1831	195.601	2007	194.134	1688	167.94
gene482	-		648	837	132.116	990	148.797	826	133.512	1010	167.338	1067	160.07	986	152.142
gene483	-		1416	4765	344.195	5457	375.34	4226	312.595	4596	348.471	5629	386.445	3913	276.308
gene484	-		393	61	15.876	74	18.3389	41	10.9271	66	18.0302	57	14.0994	71	18.064
gene65	-		1182	9649	834.968	9007	742.158	10242	907.575	10392	943.911	10936	899.416	12639	1069.16
gene485	pflC		777	3089	406.632	3384	424.173	2565	345.765	2266	313.104	3024	378.338	2299	295.846
gene486	-		747	299	40.9407	384	50.0662	260	36.4559	307	44.1232	344	44.7669	290	38.8173
gene487	pfl2		2457	5045	210.02	3618	143.416	4645	198.014	4657	203.493	5152	203.84	5483	223.131
gene488	-		669	723	110.539	477	69.4426	853	133.548	742	119.077	674	97.9385	1314	196.389
gene489	gldA		1095	5556	518.983	4801	427.023	5194	496.825	5617	550.731	6165	547.317	6232	569.064
gene490	cysK		927	5574	615.024	6209	652.343	7800	881.313	6567	760.565	7022	736.378	9619	1037.52
gene491	-		630	52	8.44243	92	14.2227	65	10.8066	51	8.69118	51	7.86954	45	7.14199
gene492	comF		1302	111	8.72001	131	9.79928	87	6.9988	87	7.17394	104	7.76501	76	5.83647
gene493	-		666	39	5.98956	45	6.5807	49	7.70614	44	7.09296	22	3.21121	27	4.05356
gene66	purE		489	2719	568.729	2313	460.681	4177	894.686	3554	780.293	2820	560.609	6826	1395.74
gene494	-		549	6044	1126.05	7782	1380.55	5053	964.034	6596	1289.9	7642	1353.18	4470	814.109
gene495	-		1095	1483	138.526	1585	140.977	1657	158.498	1175	115.205	1241	110.174	1566	142.996
gene496	-		1701	15480	930.832	15669	897.162	10813	665.82	11500	725.843	12614	720.889	9652	567.362
gene497	-		636	25	4.02057	16	2.45017	37	6.0934	32	5.40185	35	5.34971	44	6.9174
gene498	dam		858	2445	291.472	4119	467.561	2414	294.69	1983	248.133	2817	319.168	2126	247.756
gene499	-		810	2461	310.765	4269	513.305	2396	309.825	2044	270.923	2362	283.475	2187	269.967
gene500	-		939	2269	247.157	3552	368.418	2318	258.561	1990	227.529	2313	239.458	2542	270.681
gene501	-		747	1774	242.906	2580	336.382	2223	311.698	1220	175.343	1546	201.191	1780	238.258
gene502	-		825	87	10.7862	88	10.3887	86	10.9184	62	8.06839	115	13.5508	103	12.4833
gene503	-		1065	210	20.1685	176	16.0952	237	23.3085	191	19.2545	228	20.8116	236	22.1569
gene67	purK		1092	18887	1769.07	15766	1406.15	26097	2503.13	21989	2161.88	22171	1973.71	34850	3191.01
gene504	-		636	675	108.555	985	150.839	678	111.657	518	87.4424	709	108.37	610	95.9003
gene505	-		456	25	5.60764	32	6.83469	29	6.66114	20	4.70885	18	3.83731	29	6.35888
gene506	-		234	2327	1017.15	3752	1561.64	4583	2051.39	1836	842.376	2358	979.597	3525	1506.23
gene507	-		567	2293	413.643	3413	586.256	3704	684.232	1492	282.511	1729	296.436	3096	545.966
gene508	-		1776	12186	701.816	13619	746.855	15050	887.583	7626	461.002	10059	550.594	13506	760.381
gene509	-		540	528	100.01	570	102.805	656	127.24	443	88.0763	466	83.8903	644	119.245
gene510	-		501	2780	567.56	4180	812.592	3002	627.608	2649	567.667	2459	477.134	2758	550.432
gene511	-		1041	2517	247.308	2629	245.965	2455	247.011	2362	243.601	2344	218.89	2587	248.481
gene68	-		666	21278	3267.84	29573	4324.69	17033	2678.75	17955	2894.41	22606	3299.66	16266	2442.05
gene512	-		1332	3350	257.244	3478	254.308	3759	295.586	2789	224.799	3121	227.777	4007	300.789
gene513	-		549	276	51.4211	311	55.1724	276	52.6565	233	45.5652	206	36.4766	258	46.9888
gene514	-		1086	1816	171.037	1571	140.89	2083	200.898	1968	194.556	2223	198.989	2411	221.981
gene515	-		537	259	49.3322	308	55.8612	353	68.8519	283	56.5798	247	44.7139	335	62.3761
gene516	-		1764	1058	61.3468	917	50.6296	1086	64.4832	1036	63.0537	1036	57.0927	1146	64.9581
gene517	-		1743	555	32.5687	426	23.8038	596	35.8149	545	33.5698	559	31.177	625	35.8534
gene518	-		837	1787	218.376	2328	270.889	1571	196.592	1581	202.794	2182	253.425	1344	160.554
gene519	-		1035	4865	480.781	4656	438.134	4886	494.457	4932	511.602	6433	604.217	6853	662.045
gene520	-		282	1301	471.882	1584	547.066	1588	589.816	1302	495.691	1704	587.408	1452	514.831
gene521	-		114	818	733.928	590	504.059	1014	931.64	902	849.476	1180	1006.23	1384	1213.89
gene69	-		216	515	243.87	715	322.393	545	264.276	443	220.191	328	147.618	584	270.338
gene522	-		738	78	10.8104	62	8.18219	155	21.9984	147	21.385	104	13.6992	204	27.6389
gene523	-		312	16	5.2453	22	6.86755	32	10.7426	33	11.3556	11	3.42734	30	9.61422
gene524	trpE		1362	868	65.185	1309	93.6045	863	66.3665	890	70.1556	1007	71.874	770	56.5277
gene525	trpG		564	361	65.4686	408	70.4555	329	61.0987	408	77.6659	337	58.0859	409	72.509
gene526	trpD		1008	1619	164.282	1522	147.058	1534	159.397	1438	153.161	1579	152.279	1455	144.328
gene527	trpC		768	438	58.3335	426	54.0235	403	54.9616	462	64.5848	433	54.8083	398	51.8166
gene528	trpF		582	402	70.6493	328	54.8889	355	63.8882	335	61.7975	357	59.63	386	66.315
gene529	trpB		1212	2451	206.845	2393	192.298	2148	185.629	2306	204.271	2096	168.116	2043	168.544
gene530	trpA		783	699	91.3104	673	83.7119	711	95.1093	718	98.4491	733	91.0043	577	73.682
gene531	-		657	6	0.934094	13	1.92713	18	2.86961	13	2.12436	17	2.51538	19	2.89158
gene70	-		693	9532	1406.88	9649	1356.07	11580	1750.21	9413	1458.29	9504	1333.19	15456	2230.03
gene532	dpr		528	11325	2193.86	9826	1812.49	13884	2754.2	12571	2556.14	14286	2630.25	19821	3753.52
gene533	-		207	189	93.3891	239	112.451	245	123.968	150	77.7983	141	66.2168	268	129.453
gene534	glk		972	8967	943.595	9413	943.183	9211	992.558	8519	940.961	8718	871.907	10780	1108.92
gene535	-		390	3230	847.116	3733	932.239	3439	923.598	3163	870.731	3047	759.499	3957	1014.49
gene536	-		141	1	0.725414	2	1.38148	0	0	0	0	0	0	0	0
gene537	-		1845	53105	2944.04	51050	2694.84	66537	3777.31	61910	3602.58	63051	3322.12	74977	4063.3
gene538	-		255	2763	1108.27	4284	1636.23	2884	1184.6	2786	1172.98	2437	929.041	2690	1054.77
gene539	murD		1356	11442	863.072	13314	956.275	9357	722.757	10170	805.213	10795	773.896	8151	601.033
gene540	murG		1086	3781	356.108	3686	330.567	3761	362.734	3517	347.69	4186	374.705	3186	293.335
gene71	-		264	2012	779.523	2790	1029.28	2009	797.06	1751	712.084	2029	747.133	1902	720.367
gene541	ftsQ		1125	5645	513.235	7548	653.451	5528	514.672	5224	498.54	5929	512.329	4562	405.462
gene542	ftsA		1362	12316	924.906	15125	1081.56	11877	913.366	13711	1080.79	14589	1041.28	13000	954.363
gene543	ftsZ		1305	7924	621.067	8641	644.893	9969	800.122	9510	782.383	9162	682.495	10733	822.353
gene544	ylmE		672	1489	226.637	1606	232.761	1450	226.003	1650	263.611	1512	218.727	1375	204.588
gene545	ylmF		576	1401	248.783	1549	261.917	1969	358.046	1799	335.319	1638	276.446	1674	290.59
gene546	ylmG		261	1	0.39189	0	0	0	0	0	0	0	0	0	0
gene547	ylmH		792	5176	668.458	6833	840.273	5453	721.15	5181	702.324	5746	705.278	4699	593.236
gene548	divIVA		816	7189	901.121	9694	1157.04	7494	961.92	7273	956.914	8235	981.054	6336	776.377
gene549	-		2793	6314	231.227	5494	191.581	6074	227.782	7157	275.112	7422	258.327	5861	209.821
gene72	-		129	14	11.1005	23	17.3649	15	12.1791	13	10.8194	11	8.28939	14	10.8514
gene550	-		327	7789	2436.34	6692	1993.16	5667	1815.18	6520	2140.67	7363	2188.9	6095	1863.69
gene551	-		516	22430	4446.15	15650	2953.92	16827	3415.64	16224	3375.65	17984	3388.1	16936	3281.77
gene552	clpE		2262	52126	2357.04	44668	1923.26	52610	2436.08	42621	2022.93	50304	2161.87	50506	2232.53
gene553	-		981	68	7.08998	65	6.45325	69	7.36708	62	6.78535	72	7.13482	92	9.37705
gene554	-		231	248	109.811	425	179.189	243	110.182	286	132.924	249	104.787	396	171.408
gene555	-		837	2	0.244405	4	0.465445	4	0.500553	0	0	0	0	4	0.477839
gene556	-		519	0	0	0	0	0	0	0	0	0	0	0	0
gene557	-		687	2329	346.751	2022	286.654	2533	386.183	2195	343.026	2662	376.679	2825	411.158
gene558	-		735	6933	964.803	6484	859.191	6670	950.504	6697	978.233	7006	926.622	7994	1087.49
gene559	feoA		477	2678	574.245	2525	515.557	1965	431.479	2237	503.497	2607	531.303	2277	477.301
gene560	feoB		2151	28279	1344.71	22136	1002.29	26708	1300.52	27989	1397	28807	1301.9	33095	1538.4
gene561	-		153	3	2.00556	3	1.90969	3	2.05374	2	1.40342	2	1.27074	0	0
gene562	folD		855	785	93.9092	686	78.1433	846	103.638	861	108.115	936	106.421	1006	117.647
gene563	-		834	6288	771.172	5808	678.257	6316	793.216	6222	800.964	6333	738.181	6209	744.394
gene564	-		732	85	11.8772	56	7.45094	48	6.86824	88	12.9069	56	7.43698	88	12.0204
gene565	-		468	33	7.21229	37	7.69998	22	4.92371	70	16.0584	42	8.72415	12	2.56379
gene566	lytR		735	1501	208.881	1426	188.958	1154	164.45	1645	240.286	1612	213.205	1209	164.47
gene567	lytS		1743	2031	119.184	1394	77.8932	1911	114.836	2176	134.033	2066	115.227	2534	145.364
gene73	-		1296	23817	1879.69	32161	2416.9	17982	1453.28	20119	1666.67	24578	1843.58	16659	1285.26
gene568	-		1344	2467	187.748	2584	187.252	3258	253.903	2396	191.398	2709	195.943	3510	261.129
gene569	-		222	4	1.84294	2	0.877427	0	0	0	0	1	0.437892	1	0.450396
gene570	-		870	1545	181.641	1325	148.331	1794	215.982	1459	180.047	1552	173.417	1938	222.732
gene571	-		828	1848	228.285	1858	218.549	2012	254.515	1657	214.853	1869	219.431	2008	242.483
gene572	-		465	397	87.3258	429	89.8542	309	69.6018	341	78.7319	319	66.6895	346	74.3996
gene573	recN		1659	3090	190.51	2730	160.269	3366	212.512	3286	212.652	3384	198.291	3982	239.995
gene574	-		840	3383	411.934	3466	401.868	3947	492.156	3437	439.288	3819	441.967	4388	522.318
gene575	-		858	8873	1057.76	9598	1089.5	8860	1081.59	8238	1030.82	9228	1045.54	9033	1052.67
gene576	-		600	2487	423.964	4374	710.005	2219	387.366	2077	371.65	2501	405.212	1896	315.962
gene577	-		276	991	367.256	1197	422.395	1425	540.781	1148	446.562	1015	357.5	1785	646.661
gene74	purB		1299	12123	954.566	9963	746.99	13951	1124.89	14387	1189.08	15597	1167.22	19207	1478.42
gene578	-		201	2	1.01774	8	3.87639	5	2.60549	2	1.06828	2	0.967283	0	0
gene579	-		1119	271	24.771	555	48.3055	205	19.1884	195	18.7091	209	18.1567	172	15.369
gene580	-		642	58	9.24055	53	8.04035	66	10.7677	32	5.35136	39	5.9054	59	9.18892
gene581	furR		477	3910	838.423	5401	1102.78	3366	739.113	3133	705.166	3984	811.934	2918	611.666
gene582	-		156	0	0	0	0	0	0	1	0.688216	0	0	3	1.92284
gene583	pyrD		936	849	92.7762	941	97.9147	1007	112.686	602	69.051	701	72.8051	971	103.727
gene584	pmgY		693	7109	1049.25	8095	1137.67	8500	1284.7	6792	1052.24	7603	1066.53	10117	1459.71
gene585	pbp2b		2079	13235	651.14	11069	518.547	13962	703.41	12121	625.941	11783	550.961	16571	796.969
gene586	recM		600	3107	529.657	3305	536.481	2883	503.279	3033	542.713	3517	569.824	2444	407.284
gene587	-		1050	6309	614.577	7959	738.25	5809	579.465	5596	572.187	5227	483.93	5882	560.123
gene75	-		687	3473	517.074	3098	439.196	3457	527.057	4017	627.761	4629	655.013	4711	685.652
gene588	-		561	168	30.6303	120	20.833	165	30.8061	256	48.9921	242	41.9346	289	51.5089
gene589	-		951	497	53.4541	281	28.7779	386	42.513	607	68.5263	760	77.6878	414	43.5279
gene590	murF		1359	1667	125.465	1542	110.509	1905	146.822	1622	128.139	1689	120.817	2209	162.526
gene591	-		276	98	36.318	162	57.1663	74	28.0826	65	25.2845	92	32.404	97	35.1407
gene592	-		552	3266	605.176	4924	868.786	2844	539.642	2308	448.896	2765	486.94	3064	555.005
gene593	-		1248	7345	601.98	9762	761.83	5736	481.404	5664	487.257	7341	571.821	5458	437.287
gene594	-		684	653	97.6477	526	74.8969	548	83.915	584	91.6655	723	102.755	573	83.7618
gene595	-		1545	2402	159.019	2004	126.329	2433	164.941	2670	185.538	2910	183.098	2750	177.972
gene596	-		1836	1610	89.6929	1575	83.5491	1542	87.9685	2018	118.004	2230	118.073	1820	99.1165
gene76	-		915	12208	1364.67	12601	1341.28	9992	1143.79	12179	1429.02	14659	1557.41	12207	1333.94
gene597	spaP		4689	62386	1360.85	65707	1364.79	56178	1254.88	61041	1397.63	60746	1259.38	51034	1088.25
gene598	-		1554	4245	279.403	3871	242.609	5603	377.646	6630	458.049	7002	438.017	10050	646.64
gene599	-		279	447	163.873	404	141.03	385	144.535	563	216.647	482	167.943	581	208.219
gene600	-		141	4297	3117.1	4999	3453.01	4002	2972.85	3877	2952.07	3391	2337.91	3634	2576.99
gene601	-		249	14552	5977.62	21964	8591.05	19851	8350.23	17188	7410.97	17683	6903.61	25148	10098.4
gene602	-		300	4707	1604.83	4926	1599.22	4733	1652.46	5029	1799.74	5401	1750.14	4276	1425.16
gene603	-		159	271	174.332	363	222.353	354	233.196	248	167.457	270	165.077	371	233.305
gene604	-		1020	4148	415.952	4324	412.876	4416	453.465	3648	383.976	4331	412.77	4041	396.129
gene605	-		513	41	8.17469	30	5.69558	36	7.35022	25	5.23205	25	4.73742	43	8.38105
gene606	-		936	1005	109.823	1048	109.048	1235	138.199	743	85.2241	840	87.2415	1299	138.765
gene607	-		753	2804	380.88	3160	408.72	2850	396.429	3028	431.728	3301	426.158	3194	424.119
gene608	comEA		678	30	4.52581	51	7.32613	69	10.6594	62	9.81773	49	7.02564	66	9.73334
gene609	-		2235	259	11.853	274	11.9401	261	12.2315	274	13.162	275	11.9612	284	12.7054
gene610	-		627	15868	2588.57	15165	2355.64	20996	3507.39	15031	2573.77	17451	2705.65	22288	3554.27
gene611	-		1041	1236	121.443	1493	139.683	1205	121.242	861	88.7977	1060	98.9862	1013	97.2985
gene612	sod		612	130809	21862.1	125705	20004.8	144164	24672.9	109237	19163.2	129565	20580.5	136257	22261.5
gene613	-		1056	3146	304.719	3566	328.891	3430	340.209	2542	258.441	2887	265.768	3280	310.568
gene614	-		759	4430	596.99	3781	485.176	4154	573.245	3320	469.619	3766	482.345	3906	514.562
gene615	-		465	84	18.477	72	15.0804	92	20.7229	69	15.9311	79	16.5156	121	26.0184
gene616	-		1230	16129	1341.24	13765	1089.95	16320	1389.73	13228	1154.62	13122	1037.09	18311	1488.52
gene617	queA		1029	3625	360.328	3255	308.084	4101	417.436	3837	400.337	3670	346.713	4891	475.258
gene618	-		720	20930	2973.32	14885	2013.49	20583	2994.27	25682	3829.53	25578	3453.45	27457	3813.01
gene619	-		702	9920	1445.37	8683	1204.67	9166	1367.6	9608	1469.42	11372	1574.78	12021	1712.19
gene620	-		504	561	113.851	654	126.381	634	131.757	397	84.5686	514	99.1408	459	91.0604
gene621	-		717	763	108.845	673	91.4176	931	136.002	1049	157.074	1152	156.19	1589	221.591
gene622	-		501	1234	251.931	1198	232.891	1258	263.001	1432	306.87	1874	363.623	1672	333.692
gene77	-		1842	13173	731.476	18704	988.96	14790	840.996	14798	862.507	17936	946.576	14740	800.12
gene78	ruvB		1035	1147	113.352	1220	114.803	1377	139.351	1010	104.768	1093	102.66	1499	144.813
gene623	-		1374	320	23.8214	384	27.2194	349	26.6044	247	19.3001	292	20.6593	232	16.883
gene624	-		969	3397	358.572	3519	353.695	3494	377.672	3946	437.202	4286	429.98	4197	433.075
gene625	-		282	1270	460.638	1645	568.134	898	333.536	1255	477.798	1549	533.976	828	293.581
gene626	-		894	1688	193.126	2428	264.512	1862	218.151	1999	240.063	2247	244.335	1586	177.383
gene627	-		939	117	12.7446	113	11.7205	149	16.6202	182	20.8092	168	17.3926	220	23.4263
gene628	pepB		1800	1548	87.9637	1597	86.4105	1765	102.704	1340	79.9248	1514	81.766	2191	121.707
gene629	-		618	1250	206.884	1531	241.28	1278	216.6	1049	182.237	1299	204.334	1078	174.413
gene630	-		708	297	42.907	333	45.8084	308	45.5651	253	38.3651	339	46.5464	358	50.5589
gene631	prtM		1002	1764	180.068	2287	222.296	1599	167.146	1998	214.08	2176	211.111	1809	180.517
gene632	-		501	219	44.7107	271	52.6824	203	42.4398	234	50.145	204	39.5833	202	40.3145
gene79	-		426	722	173.353	850	194.332	740	181.944	551	138.865	502	114.555	661	155.146
gene633	-		2619	9049	353.403	8318	309.327	8947	357.814	8661	355.044	8741	324.448	8355	318.976
gene634	-		1029	252	25.049	299	28.3002	339	34.5064	335	34.9525	287	27.1135	262	25.4585
gene635	-		750	49	6.68251	61	7.92141	58	8.09994	62	8.87523	54	6.99926	66	8.79894
gene636	-		987	133	13.7829	174	17.1698	134	14.2201	109	11.8566	115	11.3266	183	18.5388
gene637	mutF		705	47	6.81889	21	2.90111	35	5.19989	41	6.24373	43	5.92924	35	4.96394
gene638	mutE1		249	0	0	0	0	0	0	1	0.431171	0	0	0	0
gene639	mutE2		516	19	3.76625	5	0.943744	16	3.24777	14	2.91291	15	2.82593	3	0.581325
gene640	mutG		747	33	4.51854	33	4.30256	37	5.18796	48	6.89874	33	4.2945	32	4.28328
gene641	-		840	25	3.04415	9	1.04351	14	1.74568	14	1.78936	14	1.6202	5	0.595166
gene642	-		660	38	5.88904	39	5.75512	45	7.14141	31	5.04275	37	5.44976	61	9.24131
gene80	-		384	1736	462.406	1713	434.47	2344	639.354	1817	508.011	1817	459.985	3203	834.014
gene643	-		1383	207	15.3092	200	14.0845	187	14.1623	162	12.576	219	15.3936	155	11.2062
gene644	-		246	457	190.014	535	211.813	562	239.286	424	185.046	493	194.819	514	208.918
gene645	-		690	1224	181.442	1033	145.809	1032	156.656	1078	167.733	1243	175.122	924	133.897
gene646	argC		1023	23	2.29963	11	1.04725	15	1.53579	13	1.36432	38	3.611	11	1.07514
gene647	argJ		1194	20	1.71329	15	1.22355	44	3.85979	38	3.41687	35	2.8496	35	2.93097
gene648	argB		738	40	5.54381	62	8.18219	41	5.81892	73	10.6198	75	9.87926	40	5.4194
gene649	argD		1140	17	1.52528	32	2.73388	16	1.47004	16	1.50683	13	1.10856	25	2.19272
gene650	nrdG		960	1813	193.166	1800	182.614	2267	247.341	2343	262.03	2487	251.84	2928	304.963
gene651	-		2160	21999	1041.73	28504	1285.25	22154	1074.27	20400	1013.97	26906	1210.92	25122	1162.91
gene652	-		225	176	80.0083	284	122.933	322	149.896	144	68.7115	248	107.149	368	163.536
gene81	-		1791	9052	516.956	9096	494.64	8947	523.235	9269	555.631	9638	523.132	10096	563.639
gene653	citB		2667	10033	384.78	8666	316.468	8710	342.066	13217	532.058	14882	542.448	13041	488.917
gene654	citZ		1119	7823	715.069	7836	682.022	7557	707.35	9678	928.549	10247	890.197	9933	887.56
gene655	idh		1182	4906	424.536	3927	323.577	4783	423.836	6611	600.481	6731	553.582	7548	638.501
gene656	-		798	4234	542.691	3375	411.912	4335	568.986	5715	768.887	6036	735.302	6508	815.44
gene657	ptsH		264	502	194.493	582	214.71	527	209.085	522	212.283	515	189.637	636	240.88
gene658	-		1734	20122	1186.93	16586	931.594	19442	1174.38	19587	1212.74	21893	1227.37	19278	1111.63
gene659	gapN		1428	19356	1386.41	17725	1208.9	20850	1529.3	19025	1430.36	20628	1404.26	21643	1515.43
gene660	-		393	124	32.2726	124	30.73	164	43.7086	119	32.509	108	26.7147	151	38.4177
gene661	-		843	98	11.8906	85	9.82031	87	10.8095	86	10.9527	80	9.22533	129	15.3006
gene662	-		867	107	12.6232	160	17.9736	132	15.9467	119	14.7359	102	11.4367	140	16.1457
gene82	-		78	3318	4350.98	3637	4541.33	3812	5118.86	4091	5630.98	3640	4536.56	4083	5233.98
gene663	-		339	161	48.577	254	72.974	157	48.5082	141	44.6549	177	50.7567	145	42.7677
gene664	-		186	1017	559.259	1800	942.526	989	556.927	1027	592.798	1036	541.46	815	438.119
gene665	-		2559	359	14.3492	425	16.1753	254	10.3963	327	13.7191	328	12.4601	283	11.0577
gene666	-		3414	3358	100.606	4062	115.881	3176	97.4389	2676	84.1534	3097	88.1855	2844	83.294
gene667	-		690	935	138.601	1210	170.793	726	110.205	724	112.652	838	118.063	642	93.0322
gene668	-		402	233	59.2836	338	81.8888	230	59.9262	210	56.0845	290	70.128	222	55.2172
gene669	-		135	6	4.54593	4	2.88576	7	5.431	12	9.54326	11	7.92097	2	1.4813
gene670	-		498	374	76.8152	431	84.2911	404	84.9703	345	74.3771	503	98.188	413	82.9217
gene671	-		2940	3842	133.664	5188	171.865	3493	124.442	3723	135.955	4606	152.299	3727	126.753
gene672	-		588	416	72.3637	467	77.3524	315	56.1111	408	74.4959	419	69.2718	313	53.2249
gene673	pepT		1221	2812	235.562	2518	200.851	2536	217.545	2952	259.567	3239	257.878	3223	263.932
gene674	-		486	14174	2983.05	15475	3101.19	12897	2779.51	13460	2973.43	13615	2723.33	13684	2815.3
gene675	-		195	10	5.2453	15	7.49188	18	9.66837	13	7.15744	3	1.49557	5	2.56379
gene676	-		483	3080	652.241	3298	665.024	2335	506.355	2703	600.825	2868	577.234	2580	534.097
gene677	-		684	13663	2043.12	13495	1921.55	12462	1908.3	14026	2201.54	14389	2045	11368	1661.79
gene678	-		531	4692	903.792	6544	1200.28	4468	881.321	4734	957.157	4947	905.664	5111	962.407
gene679	-		201	264	134.342	547	265.048	273	142.26	237	126.591	248	119.943	288	143.266
gene680	-		360	23	6.53477	33	8.92782	25	7.27366	35	10.4379	26	7.02086	21	5.83263
gene83	thrC		1485	7079	487.585	9289	609.223	6701	472.638	5726	413.975	7211	472.051	6921	466.004
gene681	-		627	623	101.631	707	109.821	586	97.8916	609	104.28	618	95.8166	464	73.9942
gene682	-		369	9	2.49472	5	1.31971	5	1.41925	9	2.61858	10	2.63447	6	1.62582
gene683	-		474	477	102.931	561	115.271	503	111.149	390	88.3356	384	78.754	465	98.0894
gene684	-		843	90	10.9199	109	12.5931	139	17.2704	131	16.6837	104	11.9929	224	26.5686
gene685	-		984	1331	138.353	1960	193.997	1284	136.674	873	95.2508	1297	128.134	1083	110.048
gene686	-		615	264	43.907	289	45.7674	349	59.4382	206	35.9618	300	47.4205	382	62.1063
gene687	-		849	9604	1157.04	10821	1241.35	13847	1708.3	8025	1014.81	8032	919.678	13729	1616.88
gene688	-		525	113	22.0153	76	14.099	113	22.5442	94	19.2229	95	17.5907	146	27.8062
gene84	-		1350	1463	110.845	1774	127.983	1542	119.637	1553	123.506	1422	102.397	1596	118.208
gene689	-		390	445	116.708	534	133.355	494	132.671	436	120.025	431	107.432	561	143.829
gene690	capP		2724	10928	410.335	12166	434.985	10954	421.193	8566	337.614	10442	372.646	8721	320.115
gene691	ftsW		1278	10154	812.664	9696	738.917	10888	892.344	9327	783.539	9226	701.782	11376	890.033
gene692	-		1197	53432	4565.75	67588	5499.33	50729	4438.92	52307	4691.53	61458	4991.19	46079	3849.07
gene693	-		759	4316	581.627	3999	513.149	4425	610.642	5133	726.07	6223	797.035	5282	695.831
gene694	murN		1233	3175	263.382	3708	292.894	3198	271.663	2524	219.774	3460	272.793	2541	206.058
gene695	murM		1215	9400	791.328	10014	802.722	10424	898.614	7551	667.233	9202	736.25	9873	812.494
gene696	-		810	1444	182.342	1849	222.324	1511	195.387	1146	151.897	1703	204.385	1208	149.118
gene697	-		1305	7273	570.043	6871	512.795	8368	671.624	6024	495.591	7961	593.03	8453	647.661
gene85	-		279	419	153.608	586	204.563	424	159.176	379	145.843	378	131.707	384	137.618
gene698	-		879	543	63.1853	691	76.5637	565	67.3248	451	55.0855	599	66.2457	690	78.4888
gene699	-		393	287	74.6955	485	120.194	320	85.285	253	69.1158	348	86.0808	269	68.4396
gene700	-		180	52	29.5485	72	38.9578	38	22.1119	41	24.4546	36	19.4424	56	31.1073
gene701	-		2682	6872	262.077	5903	214.362	7989	311.996	7707	308.515	7431	269.344	9276	345.819
gene702	-		741	1471	203.048	1603	210.693	1387	196.053	1339	194.004	1519	199.278	1889	254.895
gene703	-		918	1295	144.289	1719	182.376	1835	209.367	1090	127.477	1398	148.042	1608	175.142
gene704	-		384	803	213.889	1016	257.689	763	208.117	728	203.54	993	251.384	700	182.27
gene705	-		885	606	70.0381	637	70.102	675	79.8869	630	76.427	750	82.383	804	90.8365
gene86	-		1338	2359	180.334	2178	158.539	2855	223.494	2594	208.144	2321	168.631	3691	275.826
gene706	-		213	99	47.5401	164	74.9891	139	68.3519	88	44.356	99	45.183	128	60.0866
gene707	-		735	189	26.3014	322	42.668	170	24.2257	222	32.4276	192	25.3941	185	25.167
gene708	-		651	266	41.7932	270	40.394	237	38.1314	341	56.2371	303	45.2461	329	50.5315
gene709	-		426	24	5.76244	39	8.91639	35	8.60545	43	10.837	59	13.4636	55	12.9092
gene710	-		450	360	81.8267	402	87.0057	485	112.887	305	72.7674	325	70.2086	456	101.321
gene711	-		1209	498	42.1316	392	31.5787	605	52.4136	484	42.9802	531	42.6961	812	67.1548
gene712	-		135	28	21.2143	18	12.9859	26	20.1723	20	15.9054	25	18.0022	27	19.9976
gene713	-		1557	1877	123.305	2588	161.886	1217	81.8686	1041	71.7813	1409	87.9715	1446	92.8597
gene87	-		711	3962	569.967	4083	559.299	4346	640.229	4046	610.95	4129	564.54	4671	656.883
gene714	-		1059	2324	224.463	2231	205.181	2330	230.449	2195	222.53	2634	241.791	2365	223.297
gene715	-		831	1652	203.336	1818	213.072	1497	188.684	1267	163.691	1566	183.194	1377	165.684
gene716	-		822	1137	141.479	1109	131.399	1125	143.349	941	122.904	1072	126.778	1159	140.981
gene717	ftsY		1497	7123	486.683	7374	479.75	7212	504.602	6239	447.448	7659	497.359	6371	425.533
gene718	lmrB		1365	4873	365.148	4256	303.671	4758	365.096	5590	439.672	6086	433.43	5553	406.764
gene719	-		816	18045	2261.89	16402	1957.68	16933	2173.5	17358	2283.8	19443	2316.29	19450	2383.29
gene720	-		906	14495	1636.42	12002	1290.21	16459	1902.79	14353	1700.84	17156	1840.8	16991	1875.16
gene721	-		177	3	1.73362	2	1.1005	0	0	3	1.81969	3	1.64766	3	1.69471
gene88	-		750	2954	402.86	3465	449.962	2703	377.485	2637	377.484	2765	358.388	2535	337.959
gene722	-		108	6	5.68241	17	15.3306	8	7.75857	14	13.9173	28	25.2031	10	9.25814
gene723	-		2127	7858	377.876	7675	351.435	8415	414.383	6433	324.71	6794	310.511	7725	363.144
gene724	-		438	236	55.1116	295	65.5967	207	49.5007	173	42.4054	191	42.3915	199	45.4283
gene725	-		300	2614	891.229	3132	1016.8	2649	924.86	3117	1115.49	2846	922.217	3088	1029.21
gene726	-		936	39972	4368.02	47746	4968.15	41100	4599.19	36069	4137.21	38793	4029	41339	4416.03
gene727	-		780	357	46.8143	291	36.3356	346	46.4619	318	43.7705	250	31.1577	589	75.5037
gene728	-		396	692	178.738	926	227.745	847	224.029	663	179.749	756	185.586	733	185.079
gene729	-		456	5866	1315.78	8731	1864.8	4958	1138.82	5153	1213.23	5251	1119.43	4053	888.708
gene730	-		288	334	118.62	519	175.513	684	248.759	455	169.617	593	200.162	1055	366.275
gene731	-		927	3876	427.67	3929	412.797	3727	421.109	3632	420.645	4098	429.746	3985	429.829
gene89	-		588	994	172.908	1164	192.801	877	156.22	906	165.425	899	148.628	751	127.706
gene732	-		1287	10284	817.313	8791	665.264	10887	886.023	11016	918.956	11453	865.088	11886	923.431
gene733	ahpC		561	9976	1818.86	11525	2000.84	8625	1610.32	7964	1524.11	8770	1519.69	7766	1384.15
gene734	-		1533	50853	3392.96	44405	2821.13	49876	3407.73	44350	3105.99	42904	2720.67	56436	3680.96
gene735	-		519	0	0	0	0	0	0	0	0	0	0	0	0
gene736	-		837	31	3.78827	38	4.42173	28	3.50387	41	5.25905	48	5.57488	21	2.50866
gene737	-		318	14984	4819.54	16859	5163.43	11178	3681.73	11081	3741.12	16294	4981.04	9921	3119.43
gene738	-		213	77	36.9757	110	50.2976	67	32.9466	104	52.4207	144	65.7207	124	58.2089
gene739	-		1341	20161	1537.76	18063	1311.88	22998	1796.29	17032	1363.6	22558	1635.28	23106	1722.83
gene740	-		135	23	17.426	41	29.579	40	31.0343	20	15.9054	42	30.2437	56	41.4765
gene741	gbpD		2181	8574	402.099	9123	407.395	9874	474.19	6318	311.009	7364	328.23	9203	421.911
gene742	-		1491	3683	252.656	3403	222.289	3724	261.606	3992	287.45	4953	322.931	4386	294.129
gene743	-		903	5573	631.257	5650	609.389	4695	544.582	5354	636.561	6081	654.647	5345	591.844
gene744	-		2154	12276	582.929	15089	682.258	12303	598.247	9899	493.395	13498	609.177	12455	578.157
gene745	-		1158	6255	552.489	6259	526.418	6280	568.024	6564	608.568	6659	559.011	7193	621.082
gene746	aroD		678	5324	803.181	6678	959.292	4221	652.08	4633	733.638	5633	807.662	3344	493.156
gene747	aroE		870	1100	129.324	1169	130.867	1001	120.512	1094	135.004	1019	113.861	969	111.366
gene748	aroB		1068	1925	184.359	1825	166.428	1748	171.429	2095	210.602	2237	203.617	1878	175.821
gene90	fruA		4272	20724	496.189	21317	485.992	18027	441.985	22856	574.405	24628	560.425	20698	484.445
gene749	aroC		1167	6931	607.477	6675	557.076	6849	614.712	7717	709.949	8320	693.062	8199	702.486
gene750	-		1107	3188	294.561	2802	246.521	3254	307.883	4025	390.362	4379	384.545	4787	432.378
gene751	-		342	547	163.593	671	191.087	407	124.647	563	176.739	647	183.907	491	143.55
gene752	aroA		1284	4547	362.214	5017	380.551	4443	362.432	4241	354.611	5005	378.93	4774	371.762
gene753	aroK		477	1041	223.222	1060	216.432	1215	266.792	1020	229.578	1133	230.904	1394	292.208
gene754	pheA		825	366	45.3766	321	37.8953	475	60.3052	381	49.5816	449	52.9069	804	97.4428
gene755	-		1389	2542	187.188	2768	194.088	2413	181.958	2491	192.54	2486	173.988	2601	187.234
gene756	-		1356	11318	853.719	11007	790.575	10303	795.828	12337	976.785	14136	1013.41	10719	790.391
gene757	-		636	621	99.871	519	79.4775	591	97.3298	753	127.112	836	127.782	774	121.683
gene91	fruB		1560	4616	302.654	4459	278.386	3624	243.321	6002	413.067	6336	394.83	4438	284.453
gene758	-		240	330	140.64	335	135.946	239	104.304	264	118.098	298	120.705	262	109.153
gene759	-		240	14	5.96653	18	7.30458	39	17.0204	16	7.15744	33	13.3666	24	9.99879
gene760	-		390	1306	342.518	1649	411.803	1144	307.239	1057	290.978	1437	358.189	1222	313.295
gene761	-		378	200	54.1182	230	59.2611	258	71.4896	200	56.8051	268	68.9228	239	63.2199
gene762	-		408	1122	281.279	1297	309.609	928	238.234	841	221.302	991	236.12	909	222.767
gene763	-		834	16356	2005.93	19784	2310.37	16724	2100.34	12922	1663.46	13756	1603.41	15999	1918.11
gene764	-		219	193	90.1401	172	76.4924	162	77.4794	169	82.8499	186	82.5636	175	79.899
gene765	-		129	46	36.4731	42	31.7098	63	51.1524	34	28.2969	67	50.4899	120	93.012
gene766	-		363	102	28.7408	145	38.9041	146	42.1271	126	37.266	75	20.0851	174	47.9281
gene92	hrcA		1035	2459	243.009	2723	256.237	3200	323.836	1936	200.823	2519	236.596	2515	242.966
gene767	-		243	538	226.454	574	230.059	442	190.516	430	189.982	505	202.025	439	180.637
gene768	-		1311	2065	161.11	1439	106.904	2782	222.264	2099	171.893	1938	143.705	4995	380.961
gene769	-		183	3995	2232.91	3541	1884.55	4418	2528.66	4181	2452.89	4681	2486.61	5213	2848.29
gene770	-		1506	723	49.1041	717	46.369	811	56.4042	656	46.7658	682	44.0229	1044	69.3143
gene771	-		1215	15117	1272.61	23898	1915.66	12995	1120.25	12522	1106.49	15620	1249.75	12568	1034.28
gene772	-		741	5502	759.464	4150	545.461	6132	866.761	7121	1031.74	6871	901.408	7907	1066.94
gene773	-		2187	6641	310.591	7363	327.899	6117	292.958	7325	359.59	8531	379.202	7509	343.306
gene774	-		918	163	18.1614	226	23.9773	315	35.9404	163	19.0631	209	22.1321	436	47.4888
gene775	uvrB		1992	5494	282.101	5195	253.998	5753	302.496	4709	253.798	5463	266.601	5743	288.268
gene93	grpE		540	4507	853.687	4993	900.537	4879	946.351	3154	627.072	4173	751.232	4232	783.609
gene776	-		297	194	66.8113	130	42.6305	225	79.349	226	81.6961	224	73.3181	259	87.1948
gene777	-		114	5	4.48611	6	5.12602	8	7.35022	0	0	5	4.26368	10	8.77087
gene778	-		891	1924	220.868	2346	256.439	1713	201.37	1602	193.034	1968	214.717	1930	216.584
gene779	mutT		465	153	33.6545	131	27.438	165	37.166	160	36.9417	138	28.85	180	38.705
gene780	-		816	3960	496.375	4867	580.905	3663	470.178	3571	469.839	3996	476.053	3568	437.202
gene781	-		1137	1565	140.786	1869	160.097	1708	157.341	1470	138.805	1662	142.099	1918	168.669
gene782	-		816	13770	1726.03	21509	2567.23	10969	1407.97	9297	1223.21	10511	1252.2	8268	1013.11
gene783	-		177	33	19.0698	34	18.7085	38	22.4867	23	13.951	17	9.33674	35	19.7716
gene784	mscL		384	916	243.988	829	210.26	1034	282.036	1208	337.742	1096	277.459	1365	355.426
gene94	dnaK		1839	40207	2236.27	39436	2088.55	39856	2270.01	32667	1907.11	40913	2162.71	38229	2078.54
gene785	-		1521	21025	1413.88	21452	1373.64	19257	1326.1	19871	1402.62	22954	1467.06	18707	1229.77
gene786	dnaG		1779	17321	995.868	17442	954.892	16854	992.298	19612	1183.57	21226	1159.88	19629	1103.24
gene787	rpoD		1116	4934	452.21	4843	422.653	4422	415.021	5645	543.062	5929	516.46	4871	436.417
gene788	-		336	4366	1329.07	5485	1589.91	3656	1139.68	4634	1480.7	4912	1421.15	3334	992.142
gene789	-		855	3289	393.462	3679	419.081	2744	336.15	3352	420.908	3642	414.089	2527	295.52
gene790	rgpA		1089	5650	530.671	7274	650.548	5913	568.716	6373	628.297	7272	649.151	6064	556.774
gene791	rgpB		936	1789	195.497	2236	232.664	1539	172.218	2021	231.814	2291	237.941	1553	165.899
gene792	rgpC		810	466	58.8445	561	67.4546	471	60.9047	601	79.6597	589	70.6887	587	72.4604
gene793	rgpD		1218	2280	191.466	2918	233.331	1937	166.57	2820	248.571	2998	239.279	2076	170.423
gene794	rgpE		1398	7530	550.925	8760	610.282	6708	502.575	8559	657.302	10080	700.927	6316	451.734
gene95	dnaJ		1134	36684	3308.78	32451	2787.08	37793	3490.71	32136	3042.48	36302	3111.98	43159	3805.45
gene795	rgpF		1752	6731	392.962	7705	428.324	6671	398.816	7635	467.869	7908	438.785	6614	377.466
gene796	-		2541	4379	176.269	5119	196.207	3999	164.84	4606	194.612	5349	204.639	4014	157.95
gene797	-		1317	751	58.3256	769	56.8689	775	61.6355	872	71.0853	1069	78.9063	985	74.7821
gene798	-		927	15870	1751.06	16633	1747.53	14385	1625.34	16517	1912.94	15422	1617.26	15933	1718.56
gene799	-		939	1004	109.364	833	86.3999	1033	115.226	1349	154.24	1109	114.812	1442	153.549
gene800	-		1812	16380	924.614	17873	960.668	13540	782.665	17446	1033.68	17994	965.36	14200	783.57
gene801	-		1635	2596	162.402	2645	157.559	2355	150.865	2827	185.634	3131	186.159	2464	150.685
gene802	-		843	1234	149.724	1306	150.886	1088	135.181	1303	165.946	1338	154.294	1160	137.587
gene803	gshR		1353	2426	183.399	2313	166.499	2870	222.177	2084	165.367	2361	169.636	2556	188.891
gene804	fol		1257	9276	754.797	8768	679.359	9677	806.345	8723	745.04	10518	813.425	10390	826.471
gene96	truA		750	1861	253.799	2199	285.56	1990	277.912	1970	282.003	2144	277.897	1956	260.768
gene805	-		447	12904	2952.72	13576	2958	12026	2817.92	15866	3810.74	21976	4779.26	14848	3321.3
gene806	-		1143	10886	974.152	12128	1033.42	9528	873.114	9306	874.11	10378	882.647	8561	748.903
gene807	thiI		1218	11345	952.713	10759	860.317	10452	898.809	11088	977.361	10896	869.64	9246	759.021
gene808	-		1182	19350	1674.44	19168	1579.4	18238	1616.13	20230	1837.5	20497	1685.75	19990	1691
gene809	-		531	4987	960.616	4998	916.718	4192	826.879	5136	1038.44	5064	927.083	4256	801.41
gene810	-		588	1149	199.87	1029	170.44	892	158.892	1217	222.209	1280	211.618	1058	179.91
gene812	-		315	612	198.722	750	231.891	659	219.124	747	254.601	807	249.048	739	234.575
gene811	-		405	3	0.757654	0	0	1	0.258619	0	0	0	0	0	0
gene813	-		336	43372	13203.1	67883	19676.9	36669	11430.8	40991	13097.8	39579	11451	30193	8984.92
gene814	-		294	4204	1462.58	4478	1483.44	4653	1657.68	4742	1731.66	4180	1382.13	5885	2001.46
gene97	thiD		768	1158	154.224	1152	146.092	917	125.061	1186	165.795	1251	158.349	1118	145.555
gene815	-		696	195	28.657	147	20.5704	255	38.3748	233	35.9415	166	23.1856	361	51.8615
gene816	-		492	427	88.7703	527	104.323	394	83.8777	372	81.1759	453	89.5061	289	58.7327
gene817	-		906	607	68.5276	779	83.742	739	85.4341	587	69.5599	685	73.4991	851	93.918
gene818	lspA		462	39	8.63431	37	7.79998	35	7.9349	30	6.97154	36	7.57496	24	5.19418
gene819	-		891	363	41.671	340	37.1651	474	55.7206	391	47.1138	381	41.5687	662	74.2896
gene820	-		573	658	117.456	571	97.0545	753	137.643	650	121.789	640	108.579	827	144.311
gene821	pyrR		531	216	41.6068	255	46.7713	234	46.1569	241	48.7272	293	53.6405	356	67.0352
gene822	-		1266	682	55.1005	683	52.5437	681	56.3415	746	63.2637	818	62.8115	1065	84.113
gene823	pyrB		927	1006	111	853	89.6197	842	95.1366	1106	128.093	1069	112.103	996	107.43
gene824	pyrA		1089	7964	748.011	7758	693.834	6098	586.509	7508	740.194	8383	748.327	5714	524.638
gene98	-		465	65	14.2977	66	13.8237	52	11.7129	66	15.2384	85	17.7699	90	19.3525
gene825	pyrAB		3180	11544	371.308	10783	330.253	9811	323.148	11114	375.226	12834	392.333	9609	302.133
gene826	-		1335	8128	622.741	10211	744.939	7778	610.242	5910	475.287	5746	418.412	7213	540.234
gene827	-		708	4497	649.672	4803	660.714	3642	538.793	3246	492.226	3346	459.423	3630	512.65
gene828	-		1245	12111	994.983	11888	929.98	8472	712.741	9011	777.057	9246	721.945	7632	612.938
gene829	-		276	186	68.9301	121	42.6983	175	66.4116	170	66.1286	150	52.8326	152	55.0658
gene830	-		240	20	8.52361	8	3.24648	22	9.60123	11	4.92074	9	3.64545	21	8.74894
gene831	rimM		519	495	97.5535	462	86.6979	449	90.6138	397	82.1244	479	89.7197	524	100.951
gene832	trmD		723	1004	142.037	750	101.032	971	140.668	939	139.437	722	97.0775	983	135.945
gene833	trxB2		1014	4708	474.901	4114	395.148	4721	487.653	4070	430.929	4338	415.883	4591	452.707
gene99	-		564	273	49.5095	312	53.8778	232	43.0848	281	53.4905	269	46.3653	226	40.0661
gene834	-		798	4759	609.983	7963	971.869	6702	879.664	4718	634.752	3809	464.01	8185	1025.57
gene835	pfkB		912	8353	936.812	9608	1026.06	9649	1108.16	7718	908.572	7194	766.823	13652	1496.75
gene836	-		1968	9627	500.346	7006	346.72	10241	545.045	9811	535.226	8707	430.094	14771	750.468
gene837	metE		2238	203	9.27771	201	8.74722	184	8.61138	224	10.7458	213	9.25207	192	8.57805
gene838	-		1857	526	28.972	543	28.4788	509	28.7092	648	37.4638	645	33.7651	442	23.799
gene839	-		618	52	8.60636	42	6.61904	88	14.9145	45	7.8176	61	9.59535	99	16.0175
gene840	msmR		837	526	64.2784	863	100.42	664	83.0917	497	63.75	669	77.6999	878	104.886
gene841	agaL		2163	6394	302.358	7673	345.496	5305	256.888	4876	242.023	5561	249.929	4713	217.865
gene842	msmE		1263	738	59.7665	751	57.9123	716	59.3779	622	52.8733	831	63.9613	855	67.6878
gene843	msmF		873	268	31.3997	222	24.767	314	37.673	250	30.745	319	35.5219	377	43.1792
gene844	msmG		834	919	112.708	800	93.4239	748	93.9401	682	87.7946	755	88.0036	736	88.2387
gene845	gtfA		1446	1985	140.41	1704	114.772	2015	145.956	2109	156.588	2220	149.247	2430	168.029
gene846	msmK		1134	655	59.079	517	44.4029	928	85.7137	857	81.1366	793	67.9798	1453	128.115
gene847	dexB		1611	5335	338.722	4387	265.22	5470	355.637	6168	411.053	6523	393.615	6433	399.269
gene848	galR		1005	236	24.0188	193	18.7036	214	22.303	168	17.947	222	21.4737	188	18.7042
gene849	galK		1173	102	8.8942	102	8.46908	132	11.7867	91	8.329	100	8.28746	113	9.63225
gene850	galT		1476	125	8.66221	133	8.77605	129	9.15416	117	8.51038	84	5.53239	145	9.82266
gene851	galE		1065	533	51.1897	514	47.0054	577	56.7468	540	54.4369	597	54.4935	798	74.9205
gene852	pbpX		1059	17253	1666.38	16783	1543.5	15184	1501.78	14598	1479.95	18982	1742.47	13303	1256.03
gene100	-		858	7056	841.155	7583	860.771	6559	800.692	6096	762.793	6095	690.567	6267	730.331
gene853	-		543	119	22.4157	122	21.8824	158	30.477	120	23.7263	170	30.4347	164	30.1989
gene854	hsdM		1605	1351	86.0964	2110	128.039	1411	92.0804	1190	79.6015	1448	87.7027	1459	90.8924
gene855	hsdS		1812	4582	258.644	6540	351.523	3827	221.215	3988	236.29	4788	256.871	3419	188.664
gene856	-		1146	1467	130.933	2235	189.945	1181	107.94	1245	116.636	1733	147.005	1012	88.2965
gene857	-		273	7	2.62265	20	7.13512	11	4.22032	18	7.07879	20	7.12175	18	6.59261
gene858	-		279	1	0.366607	3	1.04725	1	0.375414	2	0.769618	4	1.39372	0	0
gene859	-		3048	9264	310.877	12415	396.703	6269	215.426	7363	259.352	9858	314.408	6062	198.86
gene860	-		375	94	25.639	104	27.0107	104	29.0481	98	28.0572	117	30.3301	131	34.9291
gene861	-		846	2689	325.106	2985	343.643	3048	377.363	2800	355.334	2933	337.024	2972	351.258
gene101	-		810	108	13.6378	136	16.3526	192	24.8274	169	22.4002	99	11.8815	255	31.4777
gene862	dapB		768	37021	4930.51	42828	5431.26	38535	5255.44	32979	4610.26	31737	4017.21	37836	4925.97
gene863	papS		1206	3454	292.941	3170	256.004	3773	327.684	3552	316.21	3397	273.822	3896	323.012
gene864	-		1869	26640	1457.91	27886	1453.15	25630	1436.33	23677	1360.09	24334	1265.68	25199	1348.1
gene865	-		1737	2938	173.004	2761	154.811	3389	204.356	3268	201.991	3539	198.062	4232	243.609
gene866	-		1773	7212	416.056	6690	367.495	8132	480.401	9263	560.909	9387	514.68	10405	586.787
gene867	-		921	241	26.7647	230	24.3222	384	43.6704	273	31.8238	318	33.565	392	42.5573
gene102	ropA		1284	2000	159.32	3083	233.853	2390	194.961	1977	165.307	2495	188.897	2801	218.12
gene868	gtfD		4389	44020	1025.86	59296	1315.81	53038	1265.72	40281	985.335	53785	1191.28	47212	1075.56
gene869	-		510	551	110.506	735	140.363	584	119.938	525	110.519	613	116.845	591	115.868
gene870	-		1350	3352	253.966	3483	251.278	3532	274.033	3180	252.896	3566	256.784	4413	326.849
gene871	-		384	152	40.4871	206	52.248	174	47.4606	148	41.379	189	47.8465	234	60.9301
gene872	-		489	160	33.4669	236	47.0042	136	29.1303	151	33.1526	153	30.416	86	17.5848
gene873	-		732	205	28.6449	212	28.2071	276	39.4924	198	29.0405	205	27.2247	249	34.0123
gene874	-		447	119	27.2298	197	42.9233	150	35.1479	84	20.1753	85	18.4855	99	22.145
gene875	-		654	74	11.5733	128	19.0619	115	18.4177	62	10.178	75	11.1482	148	22.6272
gene876	-		435	595	139.905	1003	224.567	1146	275.937	510	125.872	624	139.449	1401	322.03
gene877	-		1803	1326	75.2233	1486	80.2707	1782	103.521	1237	73.6586	1374	74.0816	2540	140.859
gene878	-		1755	1167	68.014	950	52.7206	1060	63.2622	1433	87.6634	1374	76.1078	1393	79.3636
gene879	tpx		486	768	161.633	878	175.951	1509	325.213	897	198.155	855	171.021	2779	571.742
gene880	-		471	3194	693.616	3018	624.069	3400	756.09	2519	574.191	2829	583.891	3057	648.966
gene881	-		624	5545	908.912	5083	793.359	6145	1031.46	4766	820.009	5084	792.028	5768	924.247
gene882	-		687	1681	250.274	1445	204.854	1423	216.952	1441	225.194	1514	214.234	1325	192.844
gene883	-		1239	6326	522.231	6956	546.792	5816	491.664	5408	468.613	6441	505.361	4972	401.243
gene884	-		351	60442	17613.1	79997	22197.3	57702	17218.6	65847	20140.9	64769	17938.2	61483	17514.4
gene103	-		138	9	6.67065	8	5.64605	11	8.34889	18	14.0037	15	10.5665	3	2.17365
gene885	-		912	2414	270.737	6021	642.995	2470	283.673	1850	217.784	2625	279.804	3584	392.935
gene886	-		1008	1762	178.793	2991	288.995	1498	155.656	1959	208.652	2172	209.469	2891	286.771
gene887	-		855	4039	483.184	7832	892.155	2849	349.013	4630	581.385	5039	572.925	5163	603.787
gene888	-		693	583	86.0479	663	93.1782	516	77.9887	1154	178.781	1284	180.116	890	128.412
gene889	-		675	283	42.8832	293	42.2764	253	39.2583	418	66.4847	369	53.1425	199	29.4779
gene890	-		765	337	45.0581	366	46.5965	392	53.671	472	66.2414	500	63.5372	313	40.9101
gene891	-		933	1093	119.824	1520	158.67	1489	167.158	1055	121.4	1089	113.466	1521	163.003
gene892	-		999	287	29.3847	302	29.4426	338	35.4378	294	31.5959	317	30.847	330	33.029
gene893	-		996	892	91.6031	1183	115.68	1025	107.79	964	103.912	851	83.0596	837	84.026
gene104	-		111	2	1.84294	1	0.877427	0	0	4	3.86889	1	0.875783	8	7.20634
gene894	-		657	746	116.139	851	126.153	1274	203.104	687	112.264	1014	150.035	1286	195.715
gene895	-		342	3098	926.531	2806	799.09	4363	1336.21	2909	913.202	4381	1245.28	4850	1417.96
gene896	mvaA		1284	965	76.8718	972	73.7285	1303	106.291	1191	99.5855	1148	86.9154	1447	112.681
gene897	-		1176	772	67.1452	880	72.8802	923	82.2072	882	80.5213	1037	85.7218	901	76.6064
gene898	thyA		840	554	67.4583	779	90.3217	743	92.6456	505	64.5448	670	77.5381	805	95.8217
gene899	-		780	949	124.445	1182	147.59	1096	147.174	849	116.859	854	106.435	953	122.165
gene900	dfrA		513	1631	325.193	2063	391.666	2212	451.63	1374	287.553	1451	274.96	2034	396.443
gene901	-		171	22	13.1593	27	15.3781	18	11.0253	31	19.4632	9	5.11642	15	8.77087
gene902	clpX		1233	6889	571.476	9012	711.856	8437	716.705	5913	514.866	6373	502.459	7197	583.628
gene105	-		171	6	3.58889	5	2.84779	6	3.67511	4	2.51138	14	7.95887	9	5.26252
gene903	-		594	557	95.9121	563	92.3115	793	139.831	535	96.6978	490	80.1917	563	94.7697
gene904	-		1377	957	71.0858	1153	81.551	1412	107.403	1281	99.8768	1175	82.9514	1693	122.934
gene905	-		951	2065	222.098	2018	206.669	2273	250.342	2361	266.541	2571	262.81	2326	244.555
gene906	-		1263	34390	2785.05	28681	2211.69	23088	1914.69	37088	3152.68	52975	4077.44	24322	1925.5
gene907	-		852	224	26.8914	320	36.5801	230	28.2751	318	40.0716	333	37.9948	313	36.7326
gene908	-		534	29	5.55471	27	4.92444	27	5.29588	33	6.63471	55	10.0125	23	4.3066
gene909	clp		2106	93921	4561.52	78287	3620.47	68371	3400.39	93289	4755.78	118400	5465.29	69058	3278.71
gene910	-		504	13	2.63826	20	3.86486	15	3.11728	16	3.40831	19	3.66474	11	2.18228
gene911	-		321	0	0	0	0	0	0	0	0	0	0	0	0
gene912	-		255	141	56.5567	143	54.6173	217	89.1322	209	87.9945	255	97.2119	297	116.456
gene106	rpoE		489	3705	774.969	4594	914.989	3648	781.378	3755	824.423	4959	985.836	3889	795.2
gene913	-		369	181	50.1715	232	61.2344	317	89.9804	245	71.2835	201	52.9528	499	135.214
gene914	-		552	1461	270.717	2120	374.051	2254	427.691	1221	237.479	1515	266.805	3218	582.9
gene915	-		1068	1365	130.727	1848	168.525	1716	168.291	1370	137.72	1688	153.646	2835	265.417
gene916	-		900	13718	1559.03	13619	1473.79	11046	1285.52	13698	1634.04	14713	1589.2	11700	1299.84
gene917	-		1287	5948	472.713	5697	431.123	5547	451.435	4833	403.169	5116	386.431	5750	446.721
gene918	-		867	2655	313.221	2245	252.192	2983	360.371	2550	315.77	2724	305.427	3743	431.666
gene919	folC		1278	1641	131.336	1306	99.5282	1730	141.785	1669	140.209	1870	142.243	2288	179.008
gene920	-		579	8299	1466.06	7833	1317.6	7127	1289.27	7483	1387.54	8331	1398.74	7303	1261.16
gene921	folP		801	2423	309.404	1550	188.466	2799	366.004	2956	396.206	2822	342.487	4316	538.761
gene107	pyrG		1611	8470	537.765	8777	530.621	8691	565.053	8216	547.538	8787	530.23	7709	478.465
gene922	folA		363	711	200.34	805	215.985	801	231.122	766	226.554	870	232.987	742	204.383
gene923	folK		480	435	92.6943	454	92.1189	423	92.3027	492	110.046	543	109.971	453	94.3636
gene924	murB		921	1079	119.83	1038	109.767	1003	114.066	1190	138.719	1279	134.999	1439	156.224
gene925	potA		1155	1924	170.384	2246	189.392	1603	145.367	2335	217.047	2521	212.183	1649	142.753
gene926	potB		795	280	36.0243	189	23.1541	334	44.0042	368	49.697	387	47.322	496	62.3824
gene927	potC		777	150	19.7458	221	27.7016	186	25.0731	189	26.115	206	25.7731	206	26.509
gene928	potD		1074	6007	572.082	6699	607.491	5620	548.084	6981	697.851	7912	716.146	6145	572.091
gene929	licT		675	1305	197.748	1272	183.534	1185	183.878	1536	244.307	1637	235.757	1311	194.199
gene930	bglP		1935	245	12.9506	311	15.6536	275	14.8856	442	24.524	373	18.739	320	16.5355
gene931	bglB1		888	119	13.7069	145	15.9034	100	11.7951	178	21.5207	155	16.9683	125	14.0749
gene932	bglB2		558	219	40.1435	217	37.8756	136	25.5282	211	40.5973	234	40.7663	145	25.9825
gene933	bglC		906	1747	197.228	1976	212.419	1485	171.678	1717	203.466	1931	207.192	1450	160.025
gene934	-		501	58	11.8412	65	12.636	43	8.98972	57	12.2148	87	16.8811	51	10.1784
gene935	bglA		1440	976	69.3254	932	63.0358	706	51.352	1023	76.2715	1133	76.4869	753	52.2853
gene936	-		516	157	31.1211	233	43.9785	172	34.9135	168	34.955	211	39.7514	220	42.6305
gene937	wapA		1362	17985	1350.64	20950	1498.1	14607	1123.31	21259	1675.77	25662	1831.61	16929	1242.8
gene938	-		1386	2871	211.873	2962	208.14	3182	240.465	3178	246.173	3278	229.914	3635	262.234
gene939	asd		1077	9501	902.316	8699	786.661	10648	1035.54	10263	1023.08	11048	997.212	11999	1113.98
gene109	fbaA		882	88301	10240	90728	10018.6	101943	12106.1	88919	10823.7	117781	12981.5	89190	10111
gene940	dapA		882	9631	1116.88	8874	979.907	10971	1302.85	10305	1254.38	9498	1046.85	12430	1409.13
gene941	-		369	2405	666.643	2431	641.642	1853	525.974	2139	622.349	2603	685.753	1887	511.32
gene942	-		966	3434	363.603	4874	491.408	4000	433.709	2814	312.749	3671	369.426	4106	425
gene943	-		852	20327	2440.27	25237	2884.91	16668	2049.08	15932	2007.61	19670	2244.32	14080	1652.38
gene944	rnh		783	1413	184.58	1397	173.768	1224	163.733	1343	184.147	1448	179.774	1109	141.618
gene945	-		963	726	77.1108	558	56.4341	986	107.242	631	70.3481	762	76.9216	1180	122.519
gene946	-		972	363	38.1984	478	47.8956	387	41.7023	299	33.0259	343	34.3042	314	32.3006
gene947	-		807	6558	831.195	7713	930.859	6915	897.499	4494	597.873	5963	718.308	4918	609.344
gene948	-		1023	9622	962.043	12436	1183.97	12084	1237.23	6426	674.395	8050	764.962	9278	906.831
gene949	-		282	96	34.8199	101	34.8824	83	30.8279	62	23.6043	40	13.7889	70	24.8197

## Sheet: Figure S1
Figure S1 Standard curve for the anthrone method, generated based on known concentrations of dextran.
